# Supplementary material
Source: PubMed Central journal article supplement (PMC10848874)
Supplement: NIHMS1928982-supplement-SI-1_draft_10_clean.pdf [file NIHMS1928982-supplement-SI-1_draft_10_clean.pdf]

# Structure Guided Design, Synthesis, and Biological Evaluation of Oxetane-Containing Indole Analogues

**Wen Ren<sup>1</sup>, Rebecca Vairin<sup>1,†</sup>, Jacob D. Ward<sup>1,†</sup>, Ricardo Francis<sup>1</sup>, Jenny VanNatta<sup>1</sup>, Ruoli Bai<sup>2</sup>, Pouguiniseli E. Tankoano<sup>1</sup>, Yuling Deng<sup>1</sup>, Ernest Hamel<sup>2</sup>, Mary Lynn Trawick<sup>1</sup>, Kevin G. Pinney<sup>1\*</sup>**

<sup>1</sup>Department of Chemistry and Biochemistry, Baylor University, One Bear Place, No. 97348, Waco, Texas 76798-7348, United States

<sup>2</sup>Molecular Pharmacology Branch, Developmental Therapeutics Program, Division of Cancer Treatment and Diagnosis, National Cancer Institute, Frederick National Laboratory for Cancer Research, National Institutes of Health, Frederick, Maryland 21702, United States

\*Corresponding author (Kevin\_Pinney@baylor.edu)

†Authors contributed equally

## **Supplemental Data Table of Contents**

|                                                                     |                 |
|---------------------------------------------------------------------|-----------------|
| <b>Molecular Docking SI</b>                                         | <b>S3</b>       |
| <b><sup>1</sup>H NMR, <sup>13</sup>C NMR, HRMS of compound 3</b>    | <b>S4–S6</b>    |
| <b><sup>1</sup>H NMR, <sup>13</sup>C NMR, HRMS, and HPLC for 5a</b> | <b>S7–S13</b>   |
| <b><sup>1</sup>H NMR, <sup>13</sup>C NMR, HRMS, and HPLC for 5b</b> | <b>S14–S21</b>  |
| <b><sup>1</sup>H NMR, <sup>13</sup>C NMR, HRMS, and HPLC for 5c</b> | <b>S22–S28</b>  |
| <b><sup>1</sup>H NMR, <sup>13</sup>C NMR, HRMS, and HPLC for 5d</b> | <b>S29–S34</b>  |
| <b><sup>1</sup>H NMR, <sup>13</sup>C NMR, HRMS, and HPLC for 5e</b> | <b>S35–S41</b>  |
| <b><sup>1</sup>H NMR, <sup>13</sup>C NMR, HRMS, and HPLC for 5f</b> | <b>S42–S48</b>  |
| <b><sup>1</sup>H NMR, <sup>13</sup>C NMR, HRMS, and HPLC for 5g</b> | <b>S49–S56</b>  |
| <b><sup>1</sup>H NMR, <sup>13</sup>C NMR, HRMS, and HPLC for 5h</b> | <b>S57–S63</b>  |
| <b><sup>1</sup>H NMR, <sup>13</sup>C NMR, HRMS, and HPLC for 5i</b> | <b>S64–S69</b>  |
| <b><sup>1</sup>H NMR, <sup>13</sup>C NMR, HRMS, and HPLC for 5j</b> | <b>S70–S75</b>  |
| <b><sup>1</sup>H NMR, <sup>13</sup>C NMR, HRMS, and HPLC for 5k</b> | <b>S76–S81</b>  |
| <b><sup>1</sup>H NMR, <sup>13</sup>C NMR, HRMS, and HPLC for 5l</b> | <b>S82–S88</b>  |
| <b><sup>1</sup>H NMR, <sup>13</sup>C NMR, HRMS, and HPLC for 5m</b> | <b>S89–S94</b>  |
| <b><sup>1</sup>H NMR, <sup>13</sup>C NMR, HRMS, and HPLC for 5n</b> | <b>S95–S100</b> |
| <b>Table of Compound Purity by HPLC (wavelength 254 nm)</b>         | <b>S101</b>     |

## 2D and 3D Representations of Compound 5m Binding Interaction

Discovery Studio Client 4.5 (Accelrys), and X-ray structure of N-deacetyl-N-(2-mercaptoacetyl)-colchicine (DAMA-colchicine) co-crystallized with tubulin (1SA0) was used in docking procedure for Compound **5m**. 2D structure of **5m** in colchicine site of tubulin. Carbon-hydrogen bonding indicated in green dashed line, acceptor-acceptor clash indicated in red dashed line. Residues THR179 and ASN101 located on  $\alpha$ -subunit, VAL238 located on  $\beta$ -subunit.

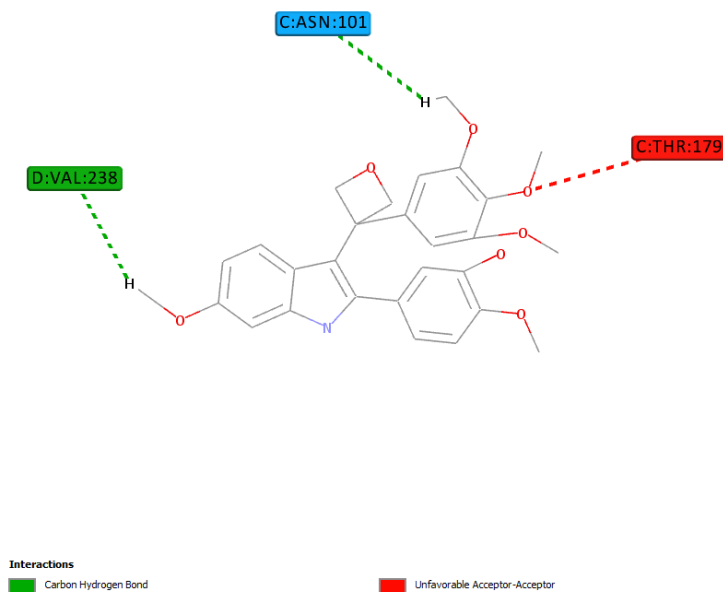

3D structure of compound **5m** within the colchicine site of tubulin indicated below. Residues on  $\beta$ -

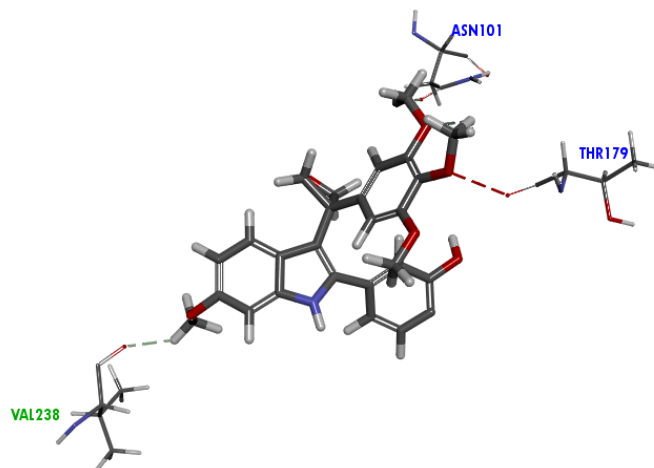

subunit indicated in green,  $\alpha$ -subunit in blue. Interactions same as indicated above.

### Compound 3

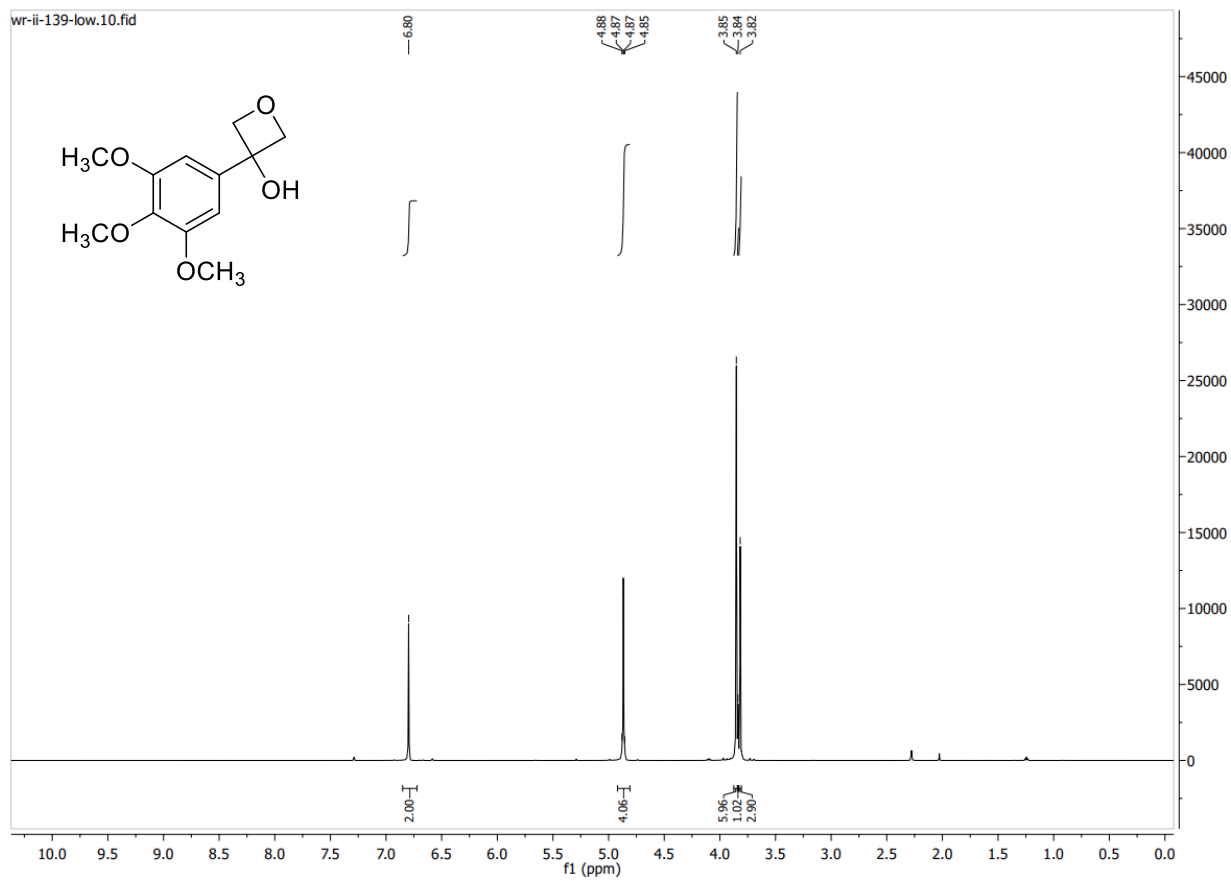



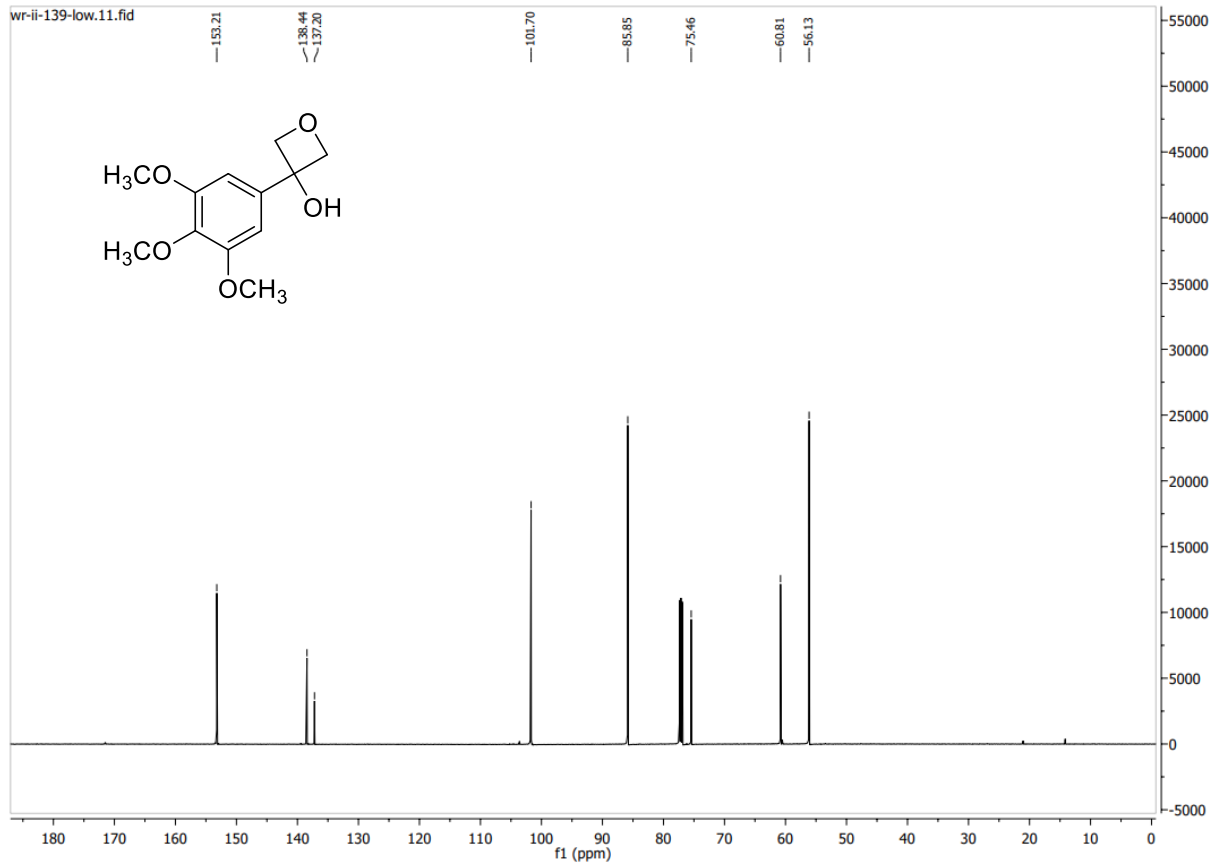

01282023-WENMETH+ #1-10 RT: 0.00-0.04 AV: 10 NL: 4.00E7  
T: FTMS + p ESI Full lock ms [50.0000-750.0000]

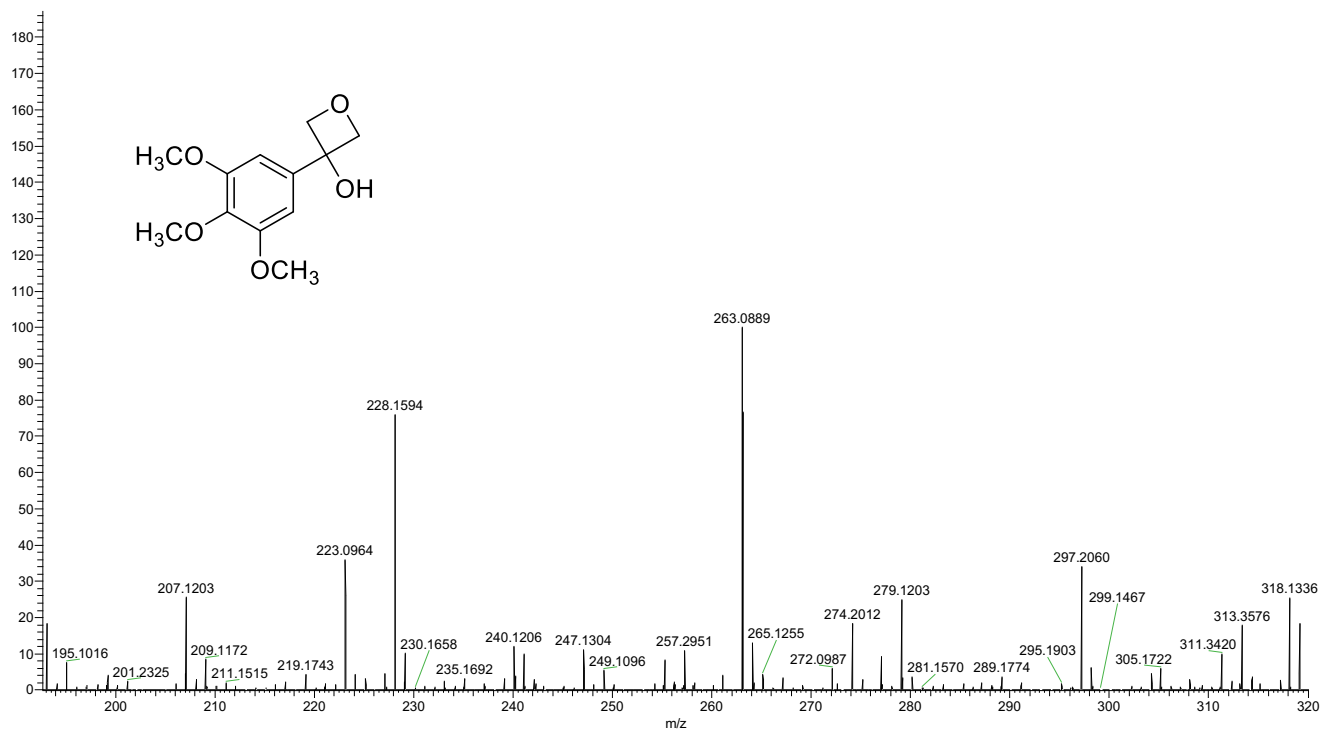

# Compound 5a

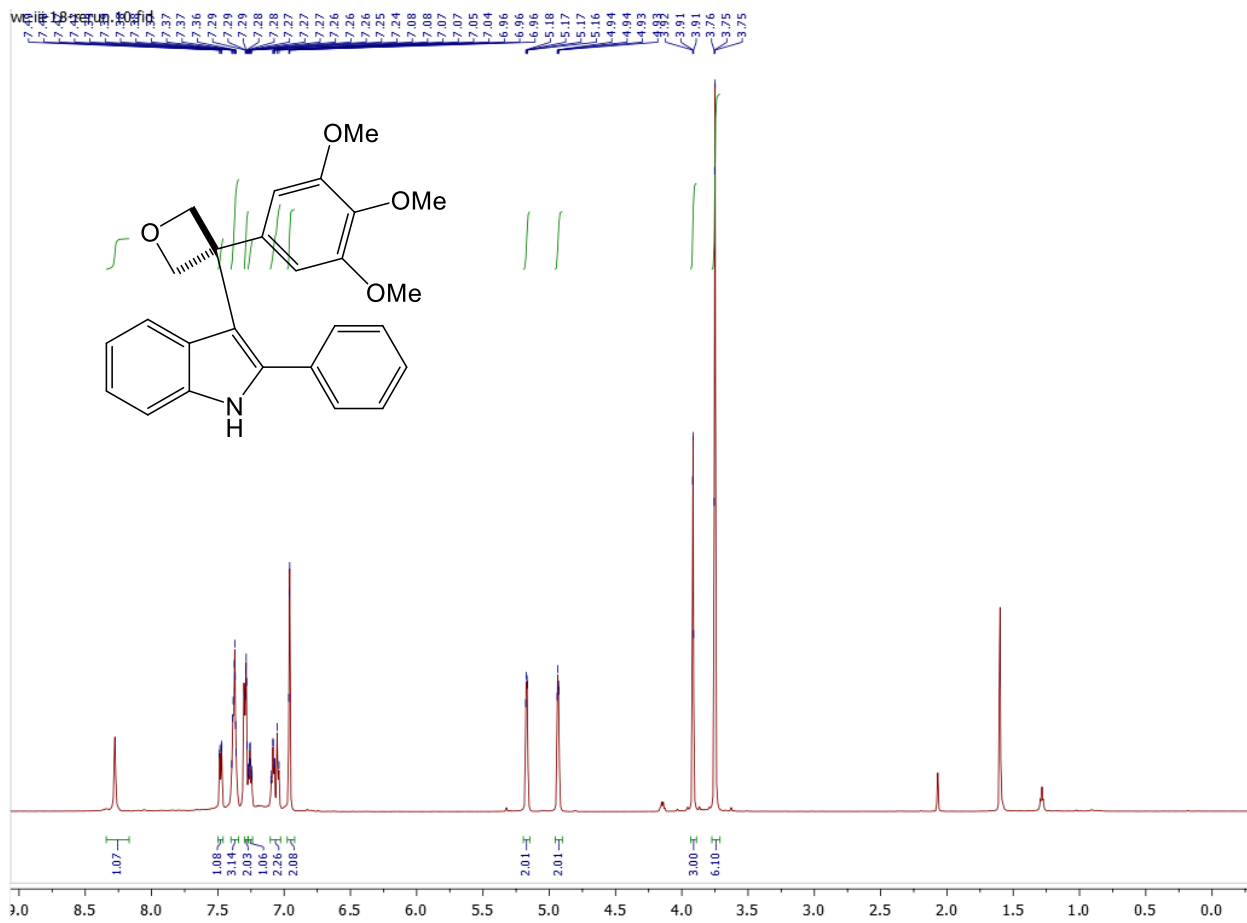

wr-iii-18-second purification.11.fid

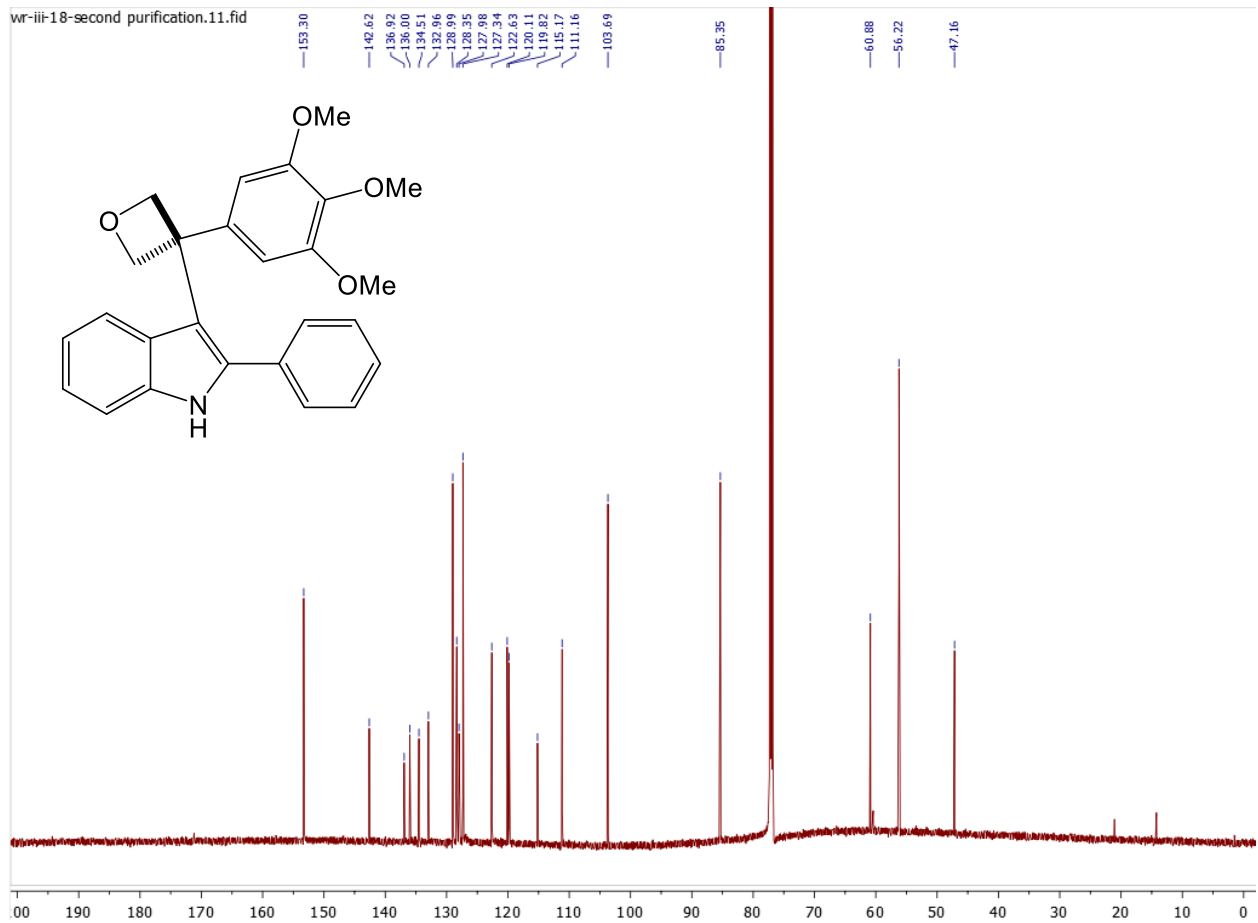

[105.00-1000.00]  
V Stable=15min TmpDiff Lock(1/1, 0ppm)

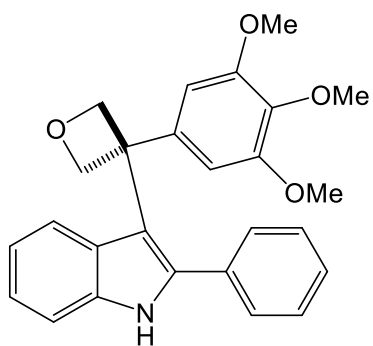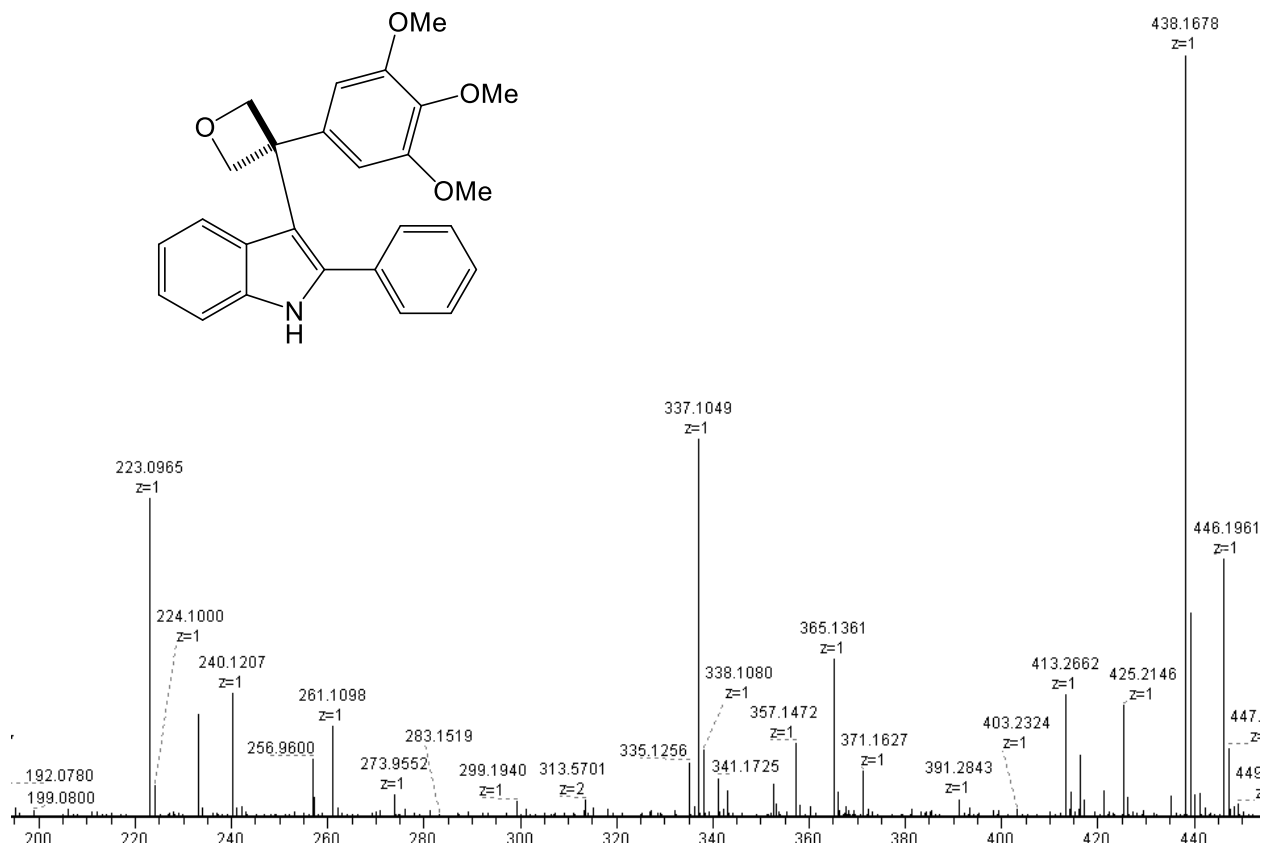

Data File C:\Chem32\1\Data\WEN\wr-iii-18-second 1.D  
Sample Name: wr-iii-18-second 1

=====  
Acq. Operator : SYSTEM  
Sample Operator : SYSTEM  
Acq. Instrument : 1200 HPLC Location : 1  
Injection Date : 7/18/2019 1:59:30 PM Inj Volume : No inj  
Acq. Method : C:\Chem32\1\Methods\GRAD 2 30-90 ACN.M  
Last changed : 4/2/2014 4:04:33 PM by ERICA P  
Analysis Method : C:\Chem32\1\Methods\GRAD 2 50-90 ACN.M  
Last changed : 4/30/2014 1:53:57 AM by ERICAP

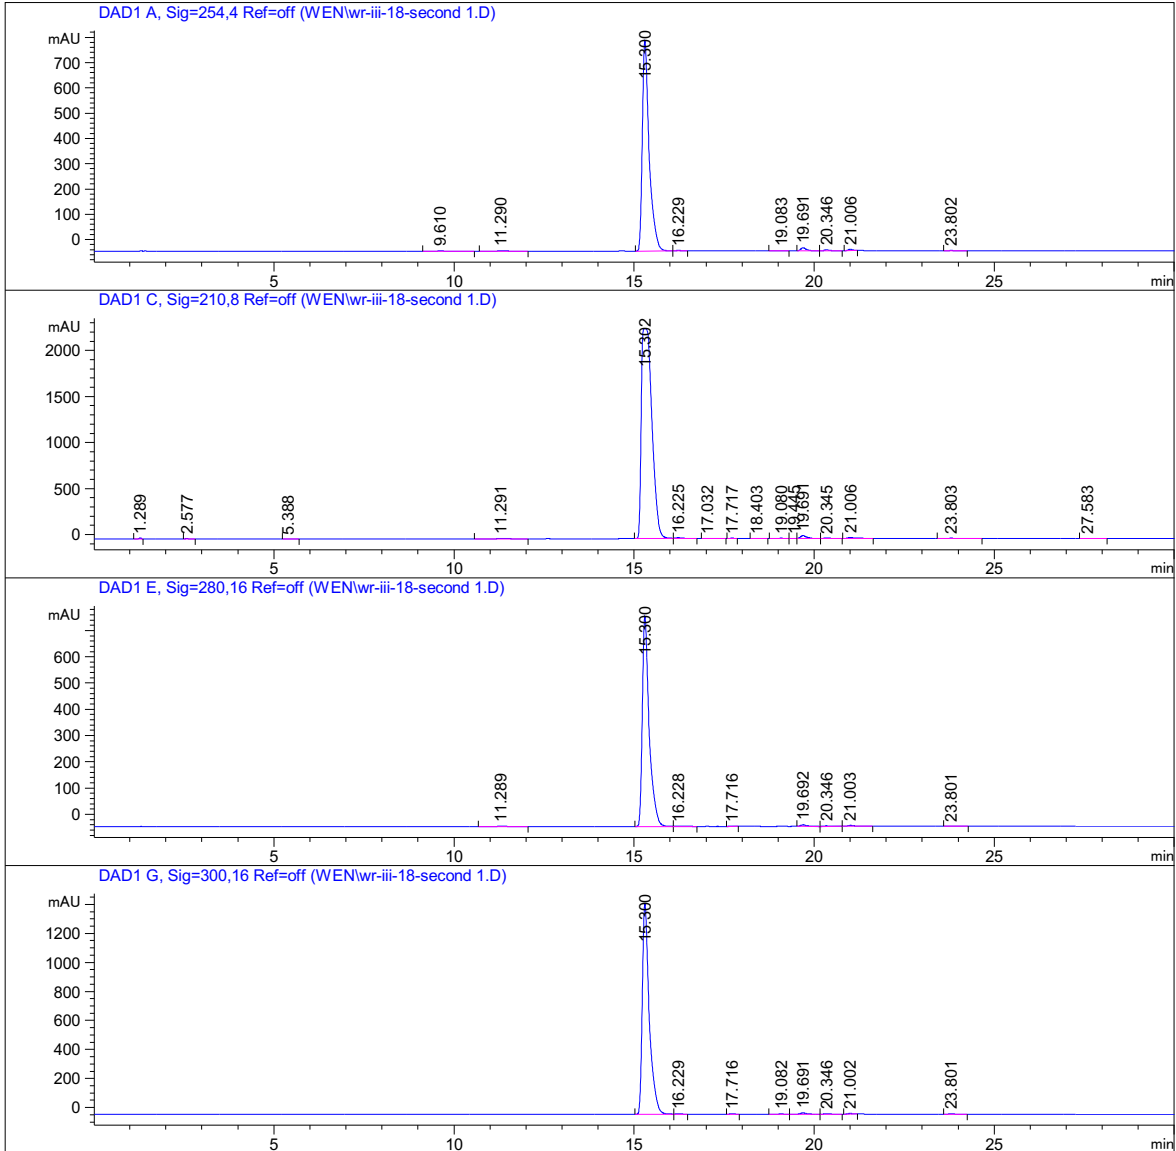

Data File C:\Chem32\1\Data\WEN\wr-iii-18-second 1.D  
 Sample Name: wr-iii-18-second 1

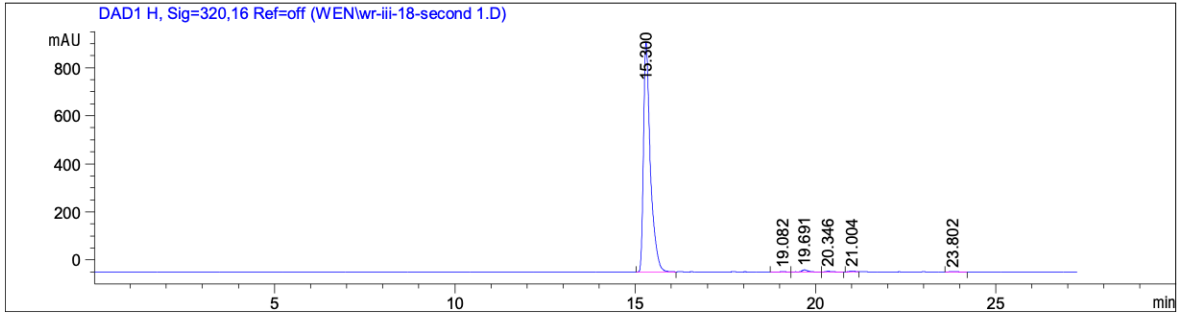

=====  
 Area Percent Report  
 =====

Sorted By : Signal  
 Multiplier : 1.0000  
 Dilution : 1.0000  
 Sample Amount : 1.00000 [ng/ul] (not used in calc.)  
 Use Multiplier & Dilution Factor with ISTDs

Signal 1: DAD1 A, Sig=254,4 Ref=off

| Peak # | RetTime [min] | Type | Width [min] | Area [mAU*s] | Height [mAU] | Area %  |
|--------|---------------|------|-------------|--------------|--------------|---------|
| 1      | 9.610         | BB   | 0.3935      | 50.88453     | 1.65124      | 0.4498  |
| 2      | 11.290        | BB   | 0.3030      | 43.81142     | 1.85861      | 0.3873  |
| 3      | 15.300        | BV   | 0.1931      | 1.09083e4    | 831.13947    | 96.4245 |
| 4      | 16.229        | VB   | 0.1572      | 21.32360     | 2.05218      | 0.1885  |
| 5      | 19.083        | BV   | 0.1971      | 15.88195     | 1.17960      | 0.1404  |
| 6      | 19.691        | VB   | 0.1775      | 148.94395    | 12.45326     | 1.3166  |
| 7      | 20.346        | BB   | 0.1776      | 51.86376     | 4.33408      | 0.4585  |
| 8      | 21.006        | BB   | 0.1526      | 48.75811     | 4.96491      | 0.4310  |
| 9      | 23.802        | BB   | 0.2009      | 23.02287     | 1.66884      | 0.2035  |

Totals : 1.13128e4 861.30219

Signal 2: DAD1 C, Sig=210,8 Ref=off

| Peak # | RetTime [min] | Type | Width [min] | Area [mAU*s] | Height [mAU] | Area %  |
|--------|---------------|------|-------------|--------------|--------------|---------|
| 1      | 1.289         | BV   | 0.0627      | 47.49611     | 10.93599     | 0.0999  |
| 2      | 2.577         | VB   | 0.0957      | 25.65813     | 3.95584      | 0.0540  |
| 3      | 5.388         | BB   | 0.1421      | 16.62289     | 1.69929      | 0.0350  |
| 4      | 11.291        | BB   | 0.2661      | 108.78239    | 5.37504      | 0.2289  |
| 5      | 15.302        | BV   | 0.3167      | 4.63041e4    | 2282.54517   | 97.4413 |
| 6      | 16.225        | VB   | 0.2117      | 149.55894    | 10.04549     | 0.3147  |
| 7      | 17.032        | BB   | 0.1960      | 39.63947     | 2.89018      | 0.0834  |
| 8      | 17.717        | BB   | 0.1274      | 26.63814     | 3.32658      | 0.0561  |
| 9      | 18.403        | BB   | 0.1812      | 22.03388     | 1.87311      | 0.0464  |

Data File C:\Chem32\11\Data\WEN\wr-iii-18-second 1.D  
 Sample Name: wr-iii-18-second 1

| Peak # | RetTime [min] | Type | Width [min] | Area [mAU*s] | Height [mAU] | Area % |
|--------|---------------|------|-------------|--------------|--------------|--------|
| 10     | 19.080        | BB   | 0.1652      | 40.12218     | 3.68057      | 0.0844 |
| 11     | 19.445        | BV   | 0.1084      | 11.72943     | 1.70139      | 0.0247 |
| 12     | 19.691        | VB   | 0.1790      | 376.99915    | 31.18987     | 0.7933 |
| 13     | 20.345        | BB   | 0.1738      | 75.69845     | 6.59981      | 0.1593 |
| 14     | 21.006        | BB   | 0.2431      | 188.33199    | 10.92349     | 0.3963 |
| 15     | 23.803        | BB   | 0.2811      | 66.29834     | 3.20865      | 0.1395 |
| 16     | 27.583        | BB   | 0.2334      | 20.30258     | 1.23755      | 0.0427 |

Totals : 4.75200e4 2381.18801

Signal 3: DAD1 E, Sig=280,16 Ref=off

| Peak # | RetTime [min] | Type | Width [min] | Area [mAU*s] | Height [mAU] | Area %  |
|--------|---------------|------|-------------|--------------|--------------|---------|
| 1      | 11.289        | BB   | 0.2404      | 42.65485     | 2.38809      | 0.3981  |
| 2      | 15.300        | BV   | 0.1924      | 1.04607e4    | 800.96173    | 97.6407 |
| 3      | 16.228        | VB   | 0.2064      | 28.73530     | 1.99055      | 0.2682  |
| 4      | 17.716        | BB   | 0.1327      | 10.29597     | 1.21641      | 0.0961  |
| 5      | 19.692        | BB   | 0.1735      | 66.74614     | 5.74819      | 0.6230  |
| 6      | 20.346        | BV   | 0.1761      | 23.10314     | 1.98006      | 0.2156  |
| 7      | 21.003        | VB   | 0.2364      | 63.97304     | 3.83996      | 0.5971  |
| 8      | 23.801        | BB   | 0.1955      | 17.25001     | 1.29383      | 0.1610  |

Totals : 1.07134e4 819.41881

Signal 4: DAD1 G, Sig=300,16 Ref=off

| Peak # | RetTime [min] | Type | Width [min] | Area [mAU*s] | Height [mAU] | Area %  |
|--------|---------------|------|-------------|--------------|--------------|---------|
| 1      | 15.300        | BV   | 0.1953      | 1.93009e4    | 1449.67871   | 98.6764 |
| 2      | 16.229        | VB   | 0.1685      | 21.21124     | 1.89572      | 0.1084  |
| 3      | 17.716        | BB   | 0.1372      | 17.33678     | 1.96051      | 0.0886  |
| 4      | 19.082        | BB   | 0.1685      | 16.28374     | 1.43374      | 0.0833  |
| 5      | 19.691        | BV   | 0.1768      | 106.77357    | 8.97469      | 0.5459  |
| 6      | 20.346        | VB   | 0.1738      | 34.34324     | 2.95115      | 0.1756  |
| 7      | 21.002        | BB   | 0.1570      | 39.90841     | 3.98044      | 0.2040  |
| 8      | 23.801        | BB   | 0.1920      | 23.03045     | 1.76766      | 0.1177  |

Totals : 1.95598e4 1472.64262

Signal 5: DAD1 H, Sig=320,16 Ref=off



Data File C:\Chem32\1\Data\WEN\wr-iii-18-second 1.D

Sample Name: wr-iii-18-second 1

| Peak # | RetTime [min] | Type | Width [min] | Area [mAU*s] | Height [mAU] | Area %  |
|--------|---------------|------|-------------|--------------|--------------|---------|
| 1      | 15.300        | BB   | 0.1934      | 1.25478e4    | 954.53064    | 98.3924 |
| 2      | 19.082        | BB   | 0.1754      | 12.47272     | 1.05871      | 0.0978  |
| 3      | 19.691        | BB   | 0.1782      | 106.48537    | 8.86263      | 0.8350  |
| 4      | 20.346        | BB   | 0.1740      | 33.53300     | 2.87756      | 0.2629  |
| 5      | 21.004        | BB   | 0.1547      | 32.84745     | 3.34219      | 0.2576  |
| 6      | 23.802        | BB   | 0.1934      | 19.67611     | 1.49605      | 0.1543  |

Totals :                    1.27528e4   972.16778

=====  
\*\*\* End of Report \*\*\*

# Compound 5b

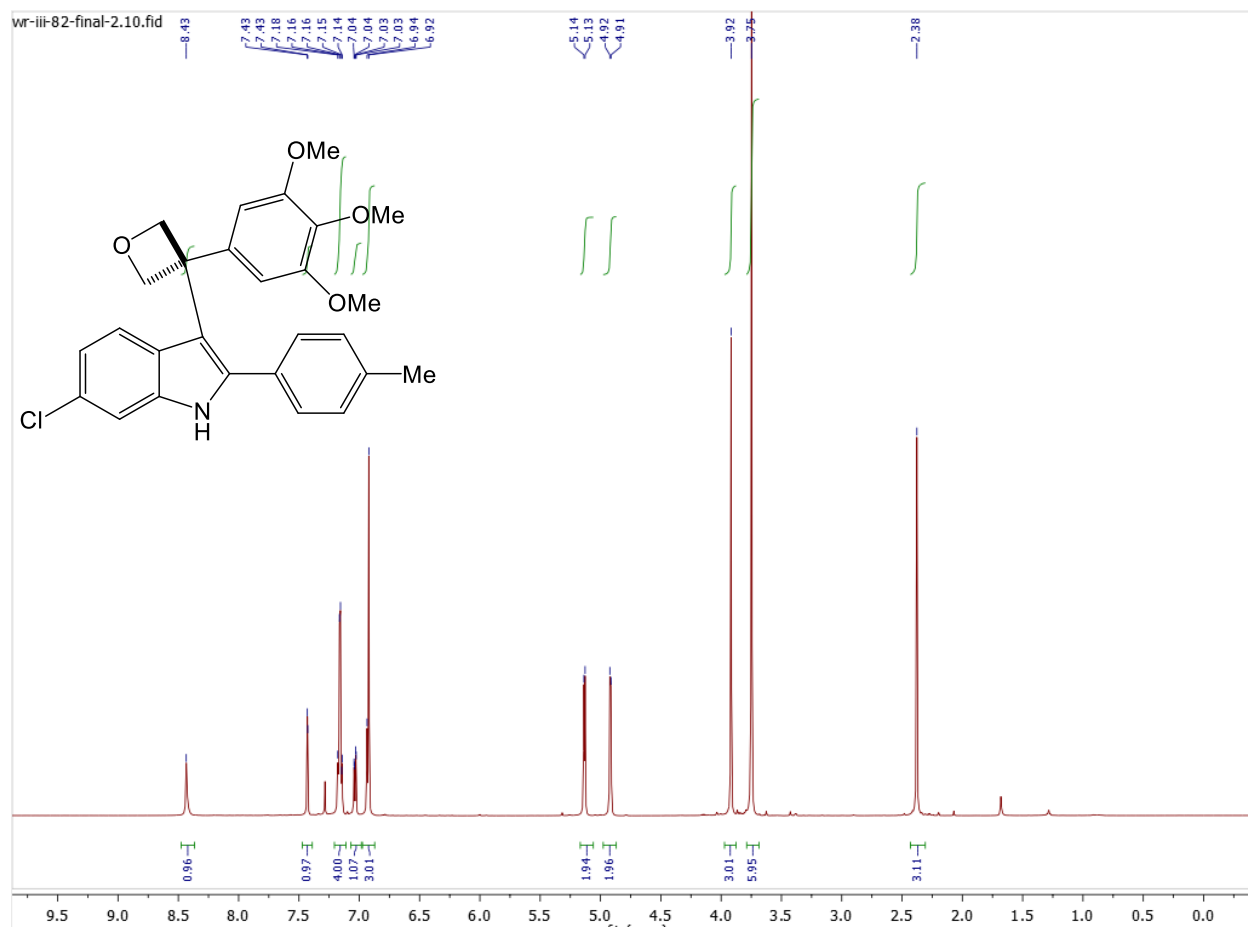

III-82 conc.10.fid

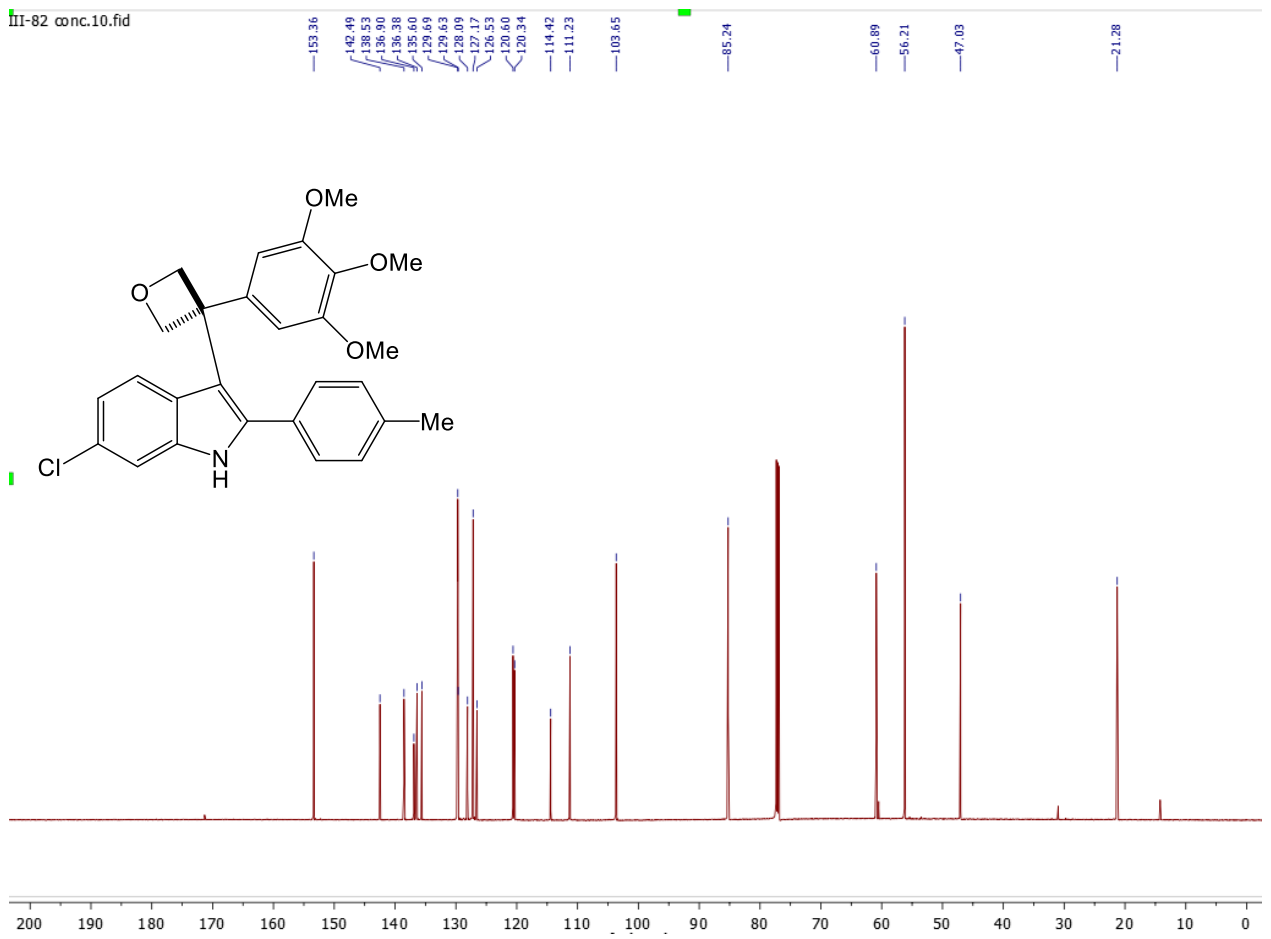

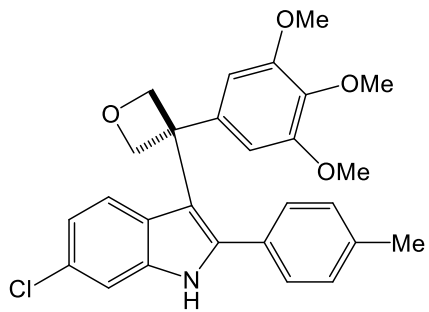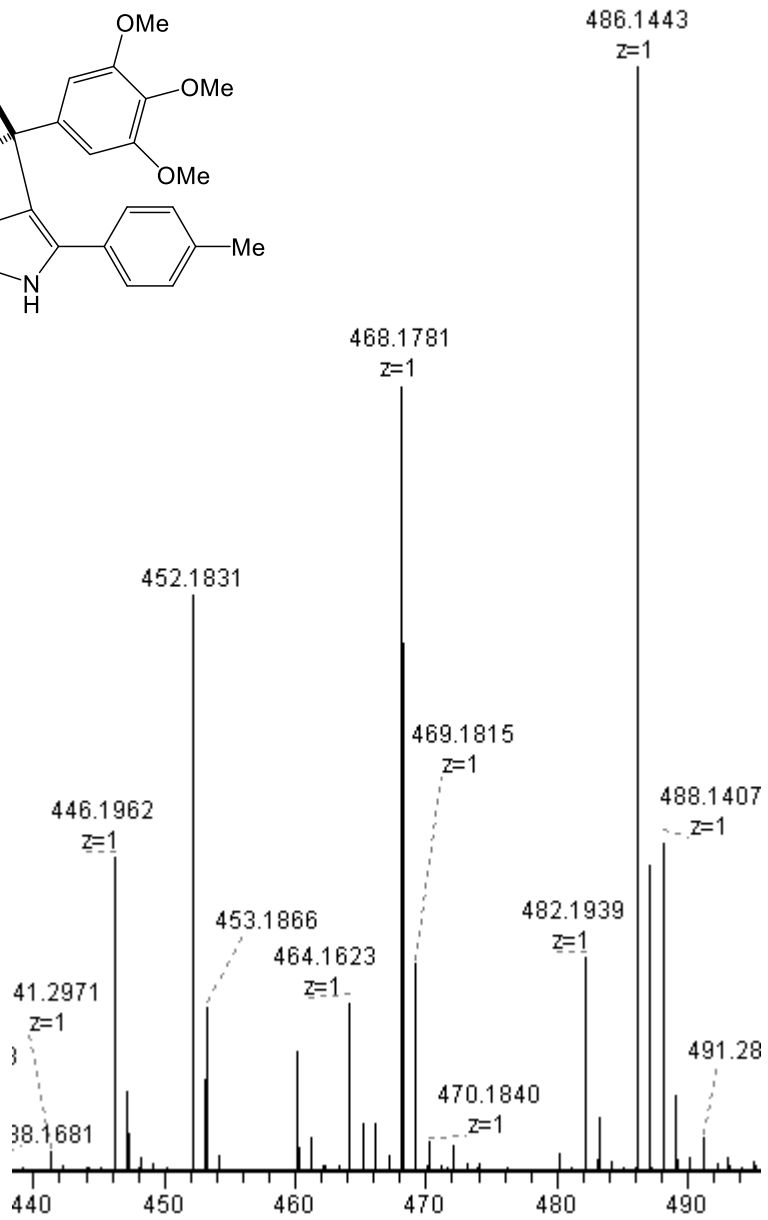

Data File C:\Chem32\1\Data\Jenny\wr-iii-82-2.D  
Sample Name: wr-iii-82-2

=====  
Acq. Operator : SYSTEM  
Sample Operator : SYSTEM  
Acq. Instrument : 1200 HPLC                      Location : 1  
Injection Date : 3/6/2023 10:43:59 AM                      Inj Volume : No inj  
Acq. Method : C:\Chem32\1\Methods\MASTERMETHOD2.M  
Last changed : 12/2/2015 12:37:42 PM by Eric Lin  
Analysis Method : C:\Chem32\1\Methods\RT-ACNWASH 2.M  
Last changed : 7/9/2015 2:27:22 PM by Blake  
Method Info : General Column Wash Method

Additional Info : Peak(s) manually integrated

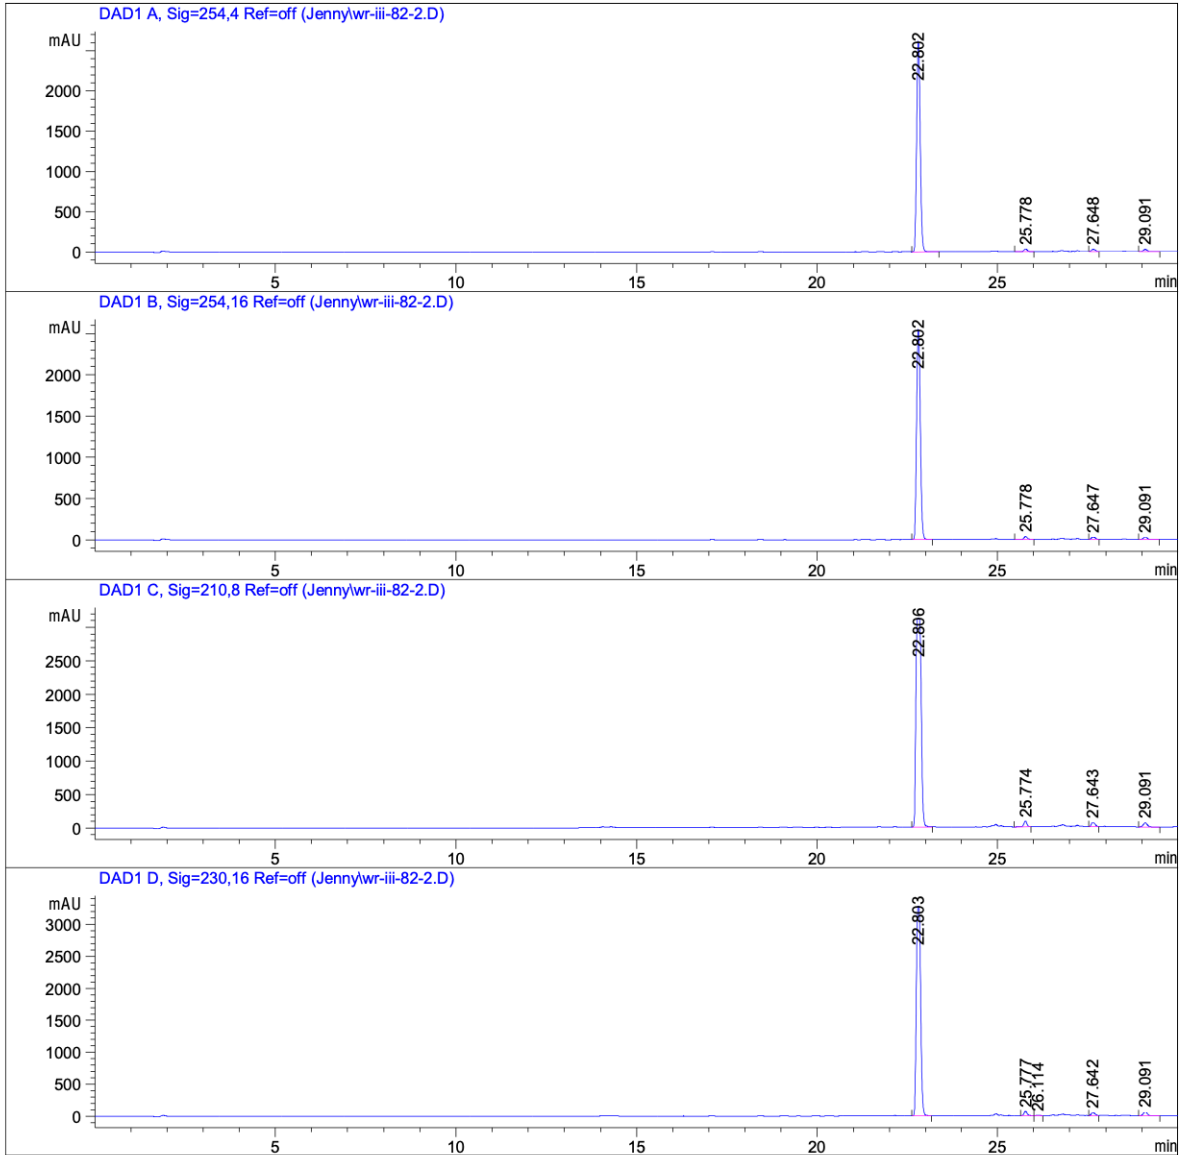

Data File C:\Chem32\1\Data\Jenny\wr-iii-82-2.D  
Sample Name: wr-iii-82-2

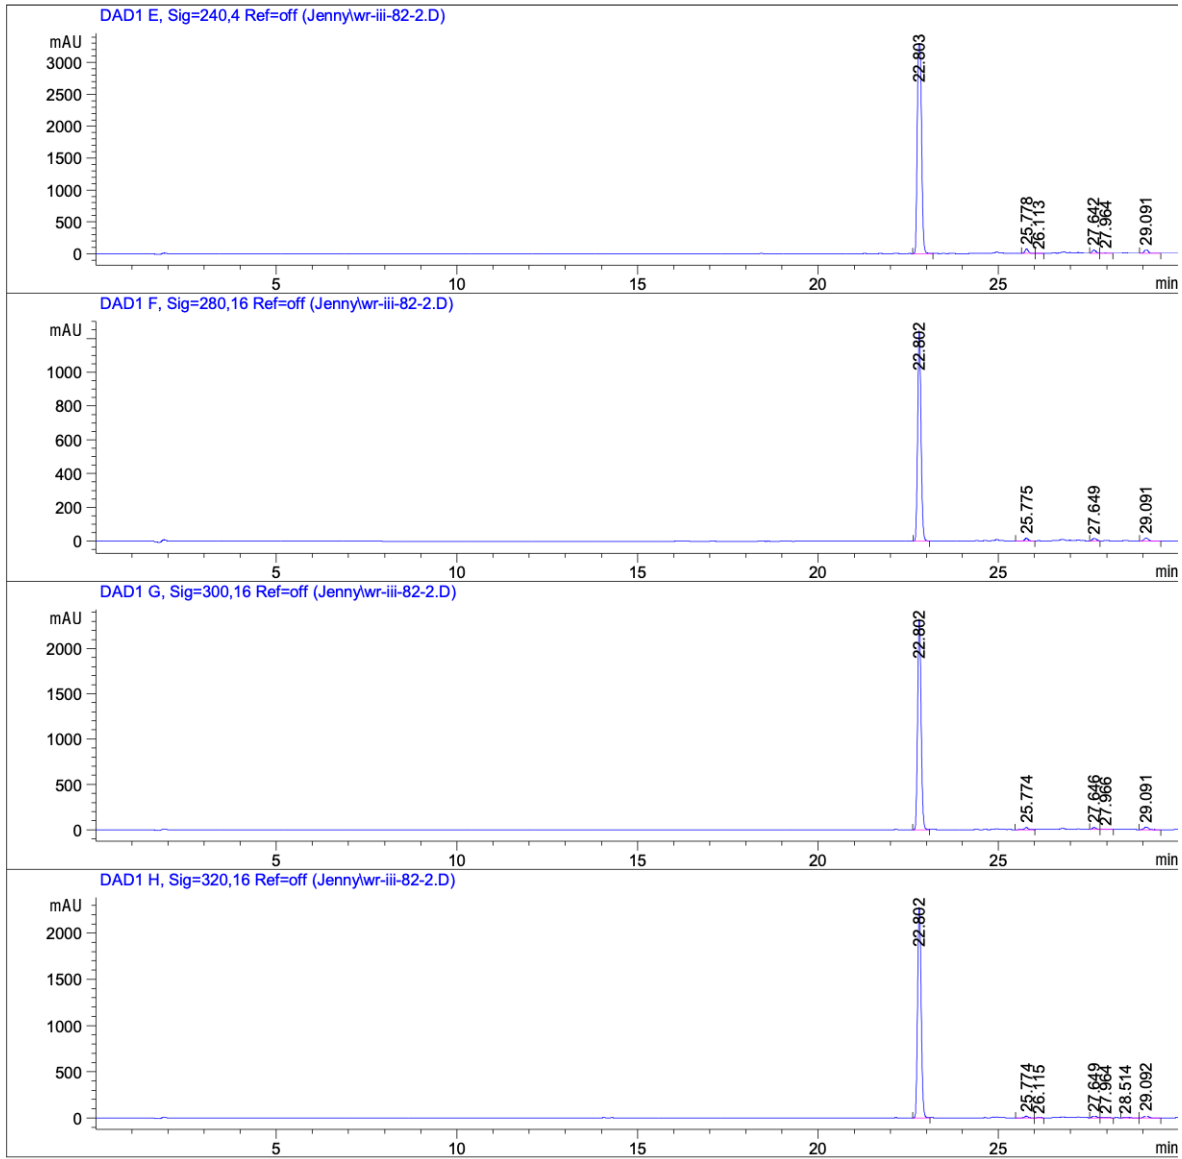

=====  
Area Percent Report  
=====

Sorted By : Signal  
Multiplier : 1.0000  
Dilution : 1.0000  
Sample Amount: : 1.00000 [ng/ul] (not used in calc.)  
Use Multiplier & Dilution Factor with ISTDs

Data File C:\Chem32\1\Data\Jenny\wr-iii-82-2.D  
Sample Name: wr-iii-82-2

Signal 1: DAD1 A, Sig=254,4 Ref=off

| Peak # | RetTime [min] | Type | Width [min] | Area [mAU*s] | Height [mAU] | Area %  |
|--------|---------------|------|-------------|--------------|--------------|---------|
| 1      | 22.802        | BB   | 0.1059      | 1.74398e4    | 2611.20264   | 96.3533 |
| 2      | 25.778        | BV   | 0.1006      | 222.11363    | 33.83608     | 1.2272  |
| 3      | 27.648        | BV   | 0.1239      | 217.25757    | 28.84854     | 1.2003  |
| 4      | 29.091        | BB   | 0.1156      | 220.68309    | 29.40542     | 1.2193  |

Totals : 1.80999e4 2703.29268

Signal 2: DAD1 B, Sig=254,16 Ref=off

| Peak # | RetTime [min] | Type | Width [min] | Area [mAU*s] | Height [mAU] | Area %  |
|--------|---------------|------|-------------|--------------|--------------|---------|
| 1      | 22.802        | BV   | 0.1116      | 1.78087e4    | 2546.18042   | 96.1686 |
| 2      | 25.778        | BV   | 0.1002      | 241.12387    | 36.91934     | 1.3021  |
| 3      | 27.647        | BV   | 0.1228      | 229.19749    | 30.81300     | 1.2377  |
| 4      | 29.091        | BB   | 0.1154      | 239.18097    | 31.91086     | 1.2916  |

Totals : 1.85182e4 2645.82362

Signal 3: DAD1 C, Sig=210,8 Ref=off

| Peak # | RetTime [min] | Type | Width [min] | Area [mAU*s] | Height [mAU] | Area %  |
|--------|---------------|------|-------------|--------------|--------------|---------|
| 1      | 22.806        | BV   | 0.1606      | 3.07292e4    | 3128.47729   | 95.5157 |
| 2      | 25.774        | BV   | 0.0916      | 523.00793    | 87.62906     | 1.6257  |
| 3      | 27.643        | BB   | 0.1166      | 455.57166    | 65.96323     | 1.4161  |
| 4      | 29.091        | BB   | 0.1155      | 464.11362    | 61.87204     | 1.4426  |

Totals : 3.21719e4 3343.94163

Signal 4: DAD1 D, Sig=230,16 Ref=off

| Peak # | RetTime [min] | Type | Width [min] | Area [mAU*s] | Height [mAU] | Area %  |
|--------|---------------|------|-------------|--------------|--------------|---------|
| 1      | 22.803        | BV   | 0.1291      | 2.62145e4    | 3283.87793   | 95.3522 |
| 2      | 25.777        | VV   | 0.0941      | 426.34061    | 68.97872     | 1.5508  |
| 3      | 26.114        | VB   | 0.1089      | 33.17459     | 4.45482      | 0.1207  |
| 4      | 27.642        | BB   | 0.1132      | 336.02618    | 49.52521     | 1.2223  |
| 5      | 29.091        | BB   | 0.1150      | 482.23447    | 64.63055     | 1.7541  |

Totals : 2.74923e4 3471.46724

Signal 5: DAD1 E, Sig=240,4 Ref=off

| Peak # | RetTime [min] | Type | Width [min] | Area [mAU*s] | Height [mAU] | Area %  |
|--------|---------------|------|-------------|--------------|--------------|---------|
| 1      | 22.803        | BV   | 0.1295      | 2.64089e4    | 3295.79419   | 95.0437 |
| 2      | 25.778        | VV   | 0.0959      | 460.40836    | 72.64408     | 1.6570  |
| 3      | 26.113        | VB   | 0.1052      | 32.45143     | 4.44567      | 0.1168  |
| 4      | 27.642        | BV   | 0.1123      | 361.85648    | 52.56580     | 1.3023  |
| 5      | 27.964        | VB   | 0.1360      | 47.60092     | 4.86992      | 0.1713  |
| 6      | 29.091        | VB   | 0.1150      | 474.85211    | 63.64465     | 1.7090  |

Totals : 2.77860e4 3493.96431

Signal 6: DAD1 F, Sig=280,16 Ref=off

| Peak # | RetTime [min] | Type | Width [min] | Area [mAU*s] | Height [mAU] | Area %  |
|--------|---------------|------|-------------|--------------|--------------|---------|
| 1      | 22.802        | BV   | 0.0973      | 7791.44824   | 1239.91174   | 95.6818 |
| 2      | 25.775        | BV   | 0.0950      | 102.90936    | 16.45016     | 1.2638  |
| 3      | 27.649        | BV   | 0.1250      | 109.79018    | 14.38403     | 1.3483  |
| 4      | 29.091        | BB   | 0.1160      | 138.93817    | 18.41994     | 1.7062  |

Totals : 8143.08596 1289.16588

Signal 7: DAD1 G, Sig=300,16 Ref=off

| Peak # | RetTime [min] | Type | Width [min] | Area [mAU*s] | Height [mAU] | Area %  |
|--------|---------------|------|-------------|--------------|--------------|---------|
| 1      | 22.802        | BV   | 0.1022      | 1.51269e4    | 2316.49438   | 96.4544 |
| 2      | 25.774        | BV   | 0.0930      | 145.56303    | 23.90901     | 0.9282  |
| 3      | 27.646        | BV   | 0.1224      | 168.88388    | 22.81687     | 1.0769  |
| 4      | 27.966        | VV   | 0.1415      | 21.33482     | 2.04874      | 0.1360  |
| 5      | 29.091        | BB   | 0.1155      | 220.27505    | 29.36234     | 1.4046  |

Totals : 1.56830e4 2394.63135

Signal 8: DAD1 H, Sig=320,16 Ref=off

| Peak # | RetTime [min] | Type | Width [min] | Area [mAU*s] | Height [mAU] | Area %  |
|--------|---------------|------|-------------|--------------|--------------|---------|
| 1      | 22.802        | BV   | 0.1066      | 1.53179e4    | 2274.95142   | 96.7437 |
| 2      | 25.774        | BB   | 0.0952      | 111.76621    | 17.80715     | 0.7059  |
| 3      | 26.115        | BB   | 0.0960      | 14.98379     | 2.29961      | 0.0946  |
| 4      | 27.649        | BV   | 0.1243      | 158.13374    | 20.88873     | 0.9987  |
| 5      | 27.964        | VV   | 0.1515      | 20.69553     | 1.83599      | 0.1307  |
| 6      | 28.514        | BB   | 0.1464      | 23.99650     | 2.32529      | 0.1516  |



Data File C:\Chem32\1\Data\Jenny\wr-iii-82-2.D  
Sample Name: wr-iii-82-2

| Peak # | RetTime [min] | Type | Width [min] | Area [mAU*s] | Height [mAU] | Area % |
|--------|---------------|------|-------------|--------------|--------------|--------|
| 7      | 29.092        | BB   | 0.1155      | 186.01294    | 24.80102     | 1.1748 |

Totals :                    1.58335e4 2344.90920

=====  
\*\*\* End of Report \*\*\*

# Compound 5c

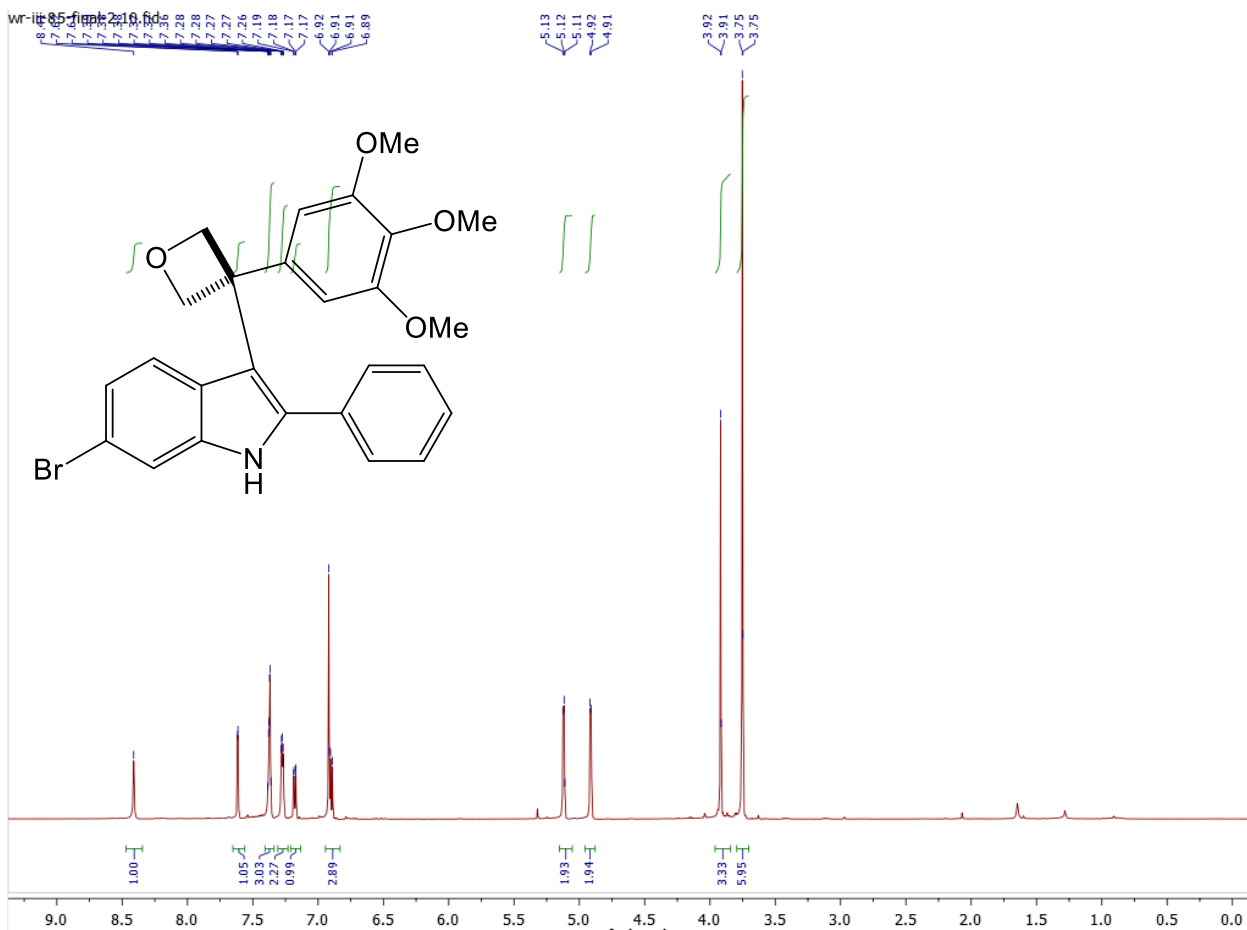

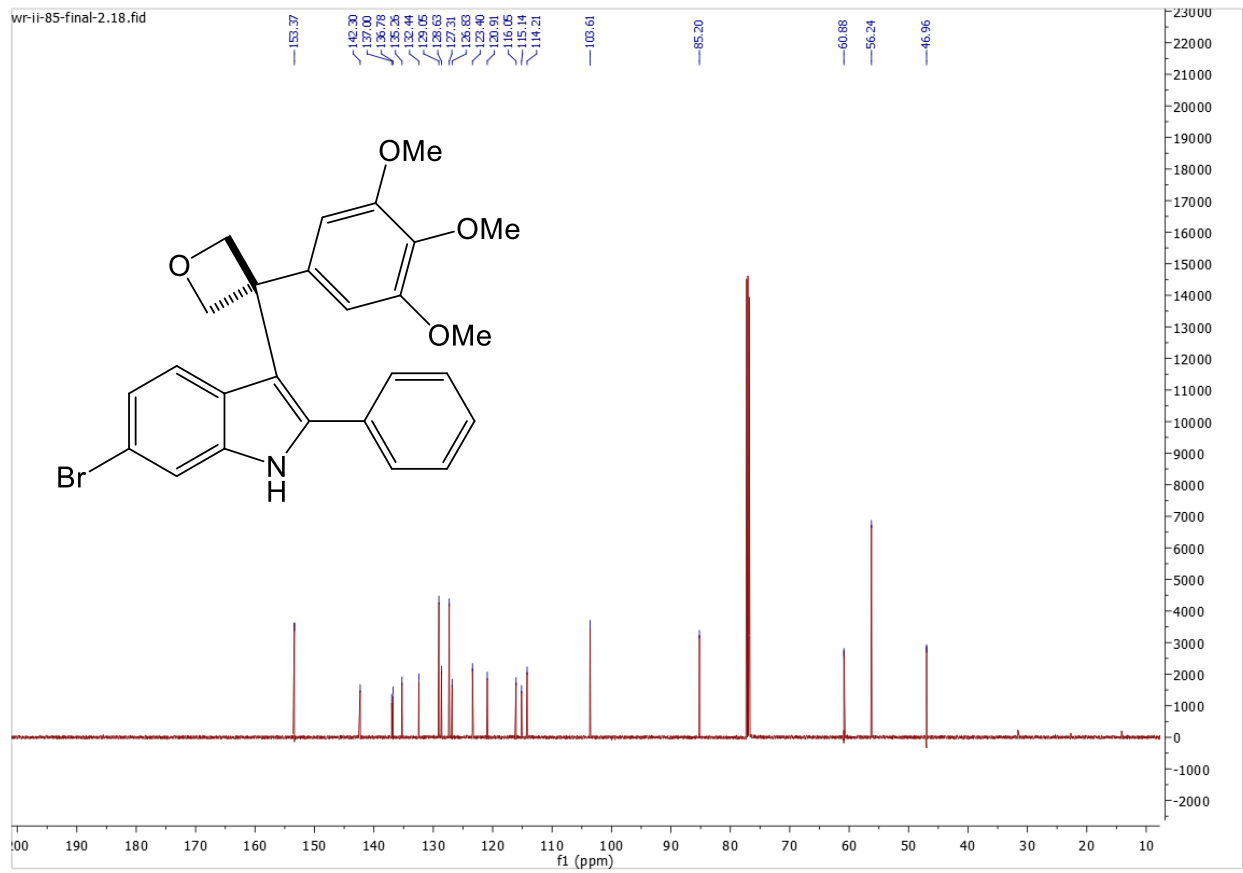

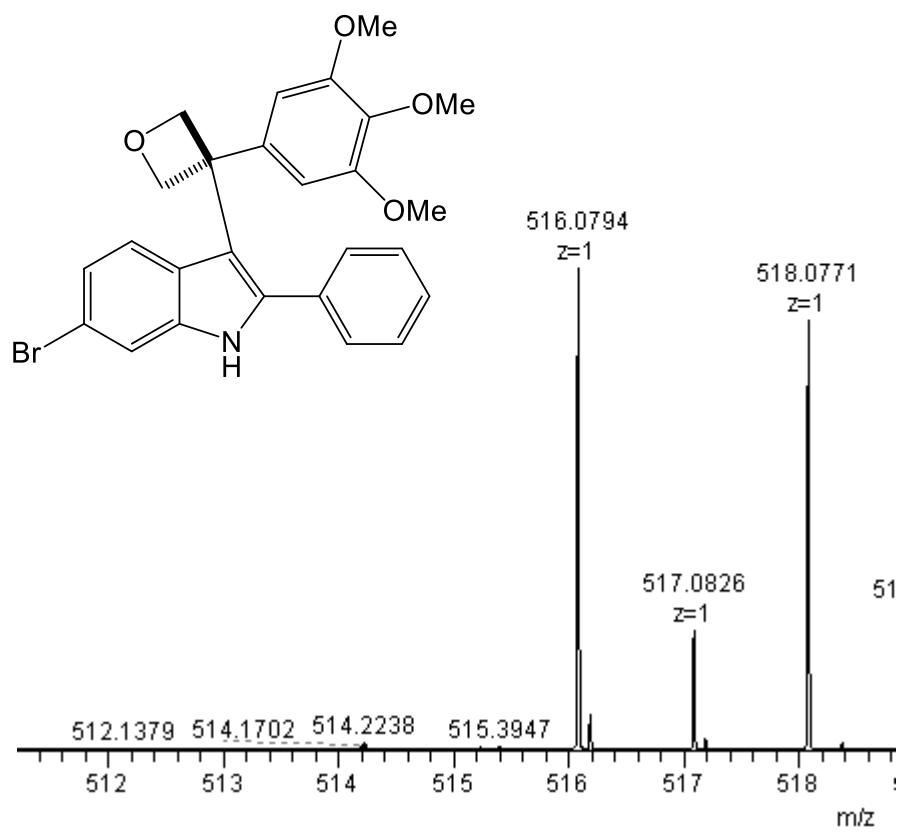

Sample Name: wr-iii-85-2

=====  
Acq. Operator : SYSTEM  
Sample Operator : SYSTEM  
Acq. Instrument : 1200 HPLC                      Location : 1  
Injection Date : 3/6/2023 1:44:33 PM                      Inj Volume : No inj  
  
Acq. Method : C:\Chem32\1\Methods\MASTERMETHOD2.M  
Last changed : 12/2/2015 12:37:42 PM by Eric Lin  
Analysis Method : C:\Chem32\1\Methods\RT-ACNWASH 2.M  
Last changed : 7/9/2015 2:27:22 PM by Blake  
Method Info : General Column Wash Method

Additional Info : Peak(s) manually integrated

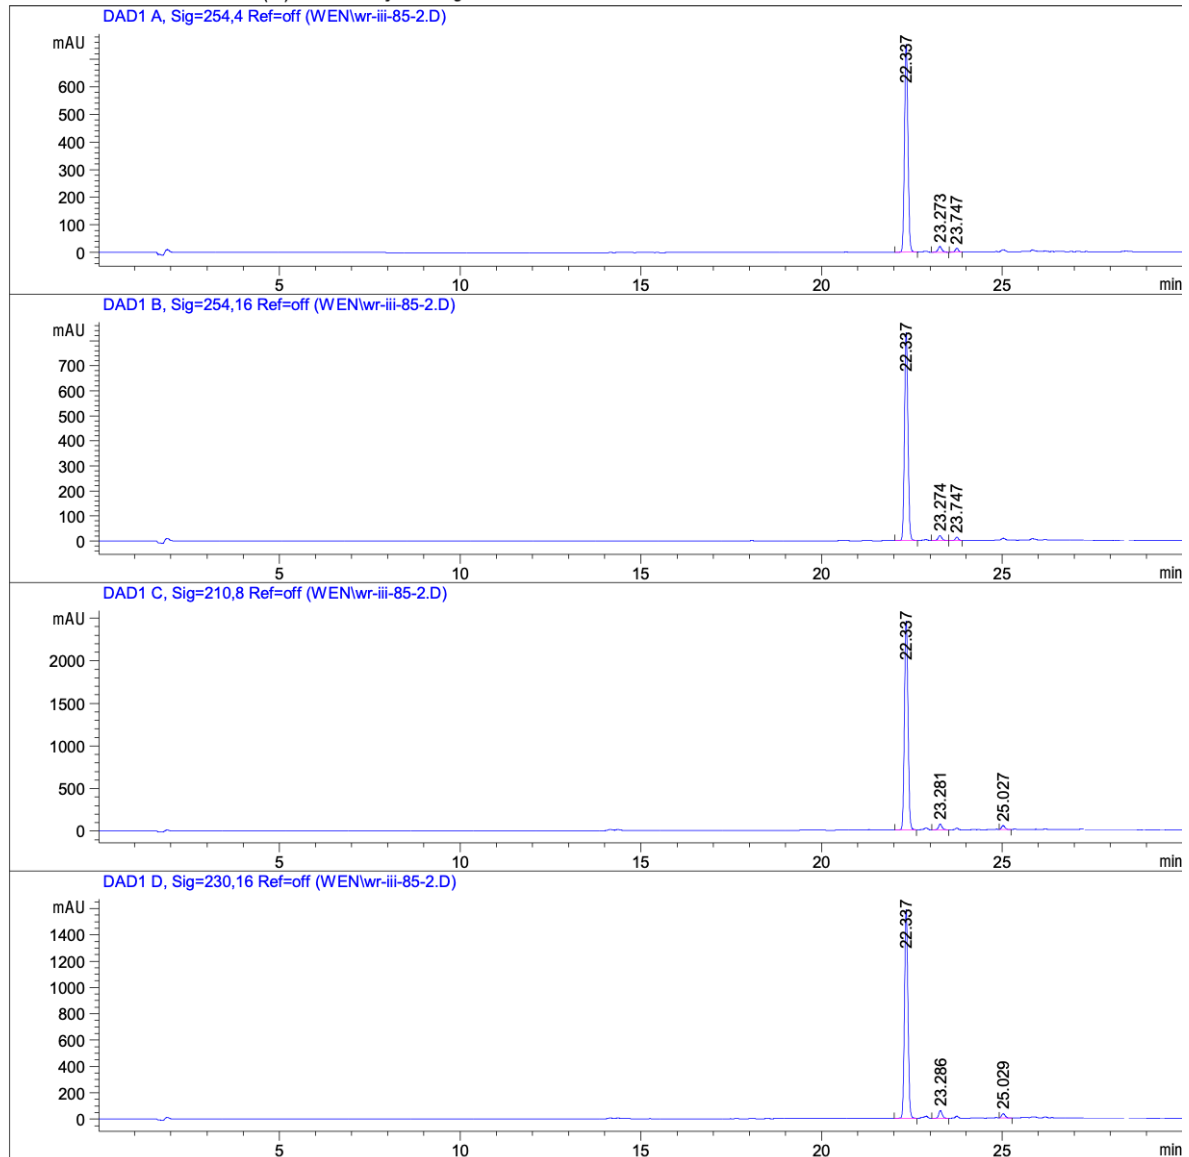

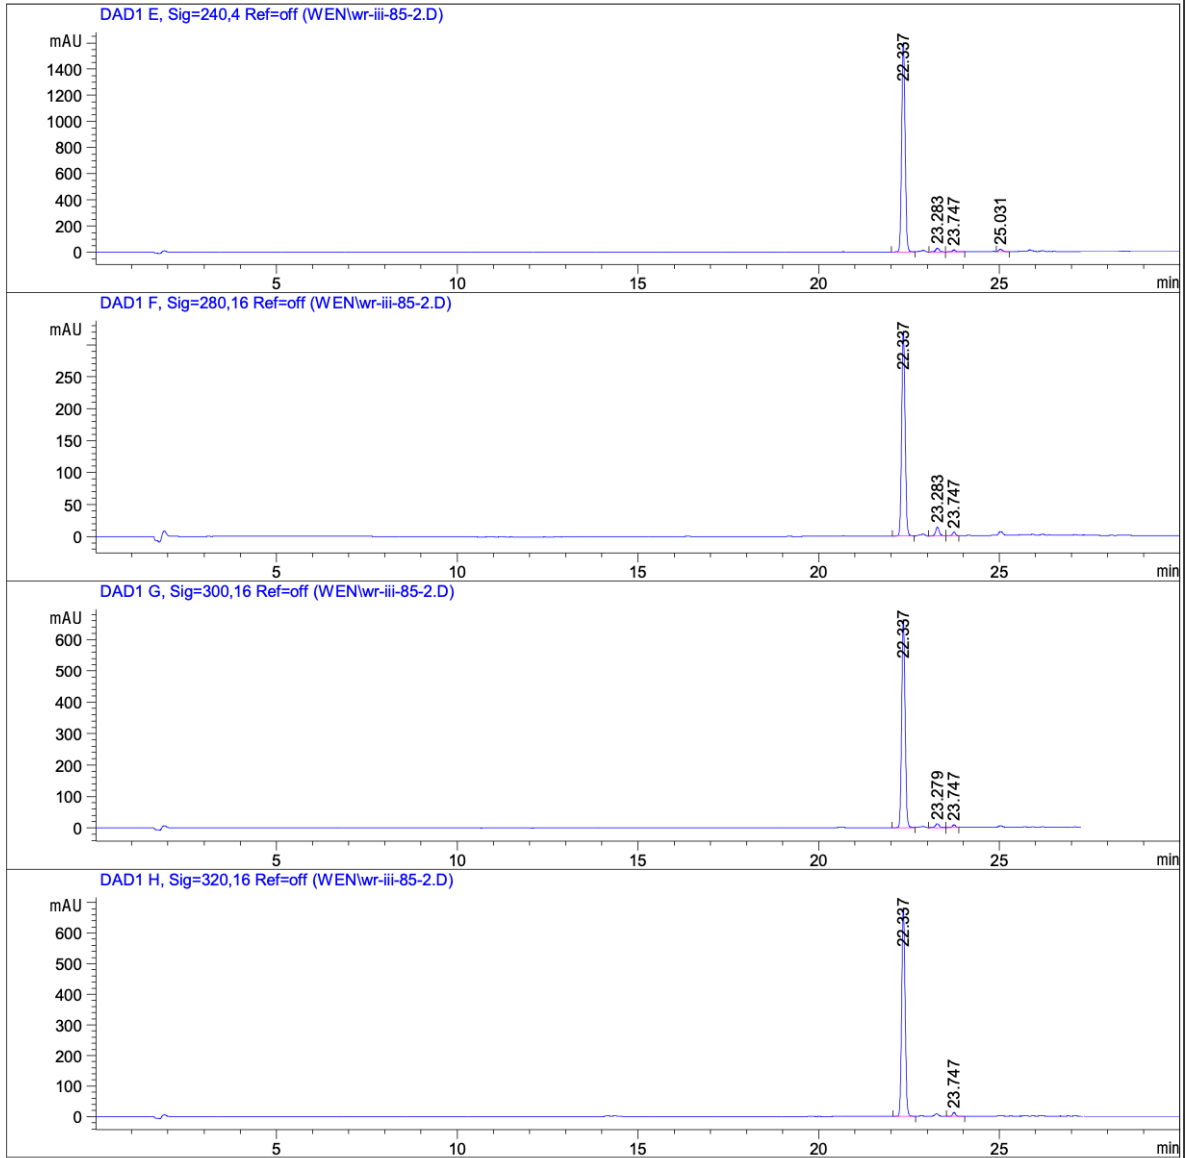

=====  
Area Percent Report  
=====

Sorted By : Signal  
Multiplier : 1.0000  
Dilution : 1.0000  
Sample Amount : 1.00000 [ng/ul] (not used in calc.)  
Use Multiplier & Dilution Factor with ISTDs

Signal 1: DAD1 A, Sig=254,4 Ref=off

| Peak # | RetTime [min] | Type | Width [min] | Area [mAU*s] | Height [mAU] | Area %  |
|--------|---------------|------|-------------|--------------|--------------|---------|
| 1      | 22.337        | BB   | 0.0996      | 4875.91992   | 752.84637    | 95.3813 |
| 2      | 23.273        | BB   | 0.1130      | 152.40520    | 20.43799     | 2.9813  |
| 3      | 23.747        | BB   | 0.0909      | 83.70277     | 14.16718     | 1.6374  |

Totals : 5112.02789 787.45155

Signal 2: DAD1 B, Sig=254,16 Ref=off

| Peak # | RetTime [min] | Type | Width [min] | Area [mAU*s] | Height [mAU] | Area %  |
|--------|---------------|------|-------------|--------------|--------------|---------|
| 1      | 22.337        | BV   | 0.0997      | 5400.87549   | 832.27887    | 95.8953 |
| 2      | 23.274        | BB   | 0.1129      | 150.52261    | 20.21642     | 2.6726  |
| 3      | 23.747        | BB   | 0.0912      | 80.65516     | 13.59647     | 1.4321  |

Totals : 5632.05326 866.09176

Signal 3: DAD1 C, Sig=210,8 Ref=off

| Peak # | RetTime [min] | Type | Width [min] | Area [mAU*s] | Height [mAU] | Area %  |
|--------|---------------|------|-------------|--------------|--------------|---------|
| 1      | 22.337        | BV   | 0.1045      | 1.65231e4    | 2454.30737   | 95.3167 |
| 2      | 23.281        | BB   | 0.1080      | 492.30078    | 68.34073     | 2.8399  |
| 3      | 25.027        | VB   | 0.1078      | 319.54886    | 46.69796     | 1.8434  |

Totals : 1.73350e4 2569.34606

Signal 4: DAD1 D, Sig=230,16 Ref=off

| Peak # | RetTime [min] | Type | Width [min] | Area [mAU*s] | Height [mAU] | Area %  |
|--------|---------------|------|-------------|--------------|--------------|---------|
| 1      | 22.337        | BV   | 0.1016      | 1.02993e4    | 1588.89661   | 94.1846 |
| 2      | 23.286        | BB   | 0.1020      | 399.33817    | 59.73422     | 3.6519  |
| 3      | 25.029        | VV   | 0.1116      | 236.58698    | 33.01656     | 2.1635  |

Totals : 1.09352e4 1681.64739

Signal 5: DAD1 E, Sig=240,4 Ref=off

| Peak # | RetTime [min] | Type | Width [min] | Area [mAU*s] | Height [mAU] | Area %  |
|--------|---------------|------|-------------|--------------|--------------|---------|
| 1      | 22.337        | BV   | 0.1017      | 1.03912e4    | 1600.69543   | 95.9015 |
| 2      | 23.283        | BB   | 0.1060      | 206.19827    | 29.32318     | 1.9030  |
| 3      | 23.747        | BB   | 0.0960      | 98.42836     | 15.51506     | 0.9084  |
| 4      | 25.031        | VV   | 0.1187      | 139.45804    | 18.33497     | 1.2871  |

Totals : 1.08353e4 1663.86864

Signal 6: DAD1 F, Sig=280,16 Ref=off

| Peak # | RetTime [min] | Type | Width [min] | Area [mAU*s] | Height [mAU] | Area %  |
|--------|---------------|------|-------------|--------------|--------------|---------|
| 1      | 22.337        | BB   | 0.0993      | 2072.29517   | 320.92938    | 93.9197 |
| 2      | 23.283        | BB   | 0.1070      | 97.21315     | 13.65925     | 4.4059  |
| 3      | 23.747        | BV   | 0.0933      | 36.94506     | 6.04259      | 1.6744  |

Totals : 2206.45338 340.63122

Signal 7: DAD1 G, Sig=300,16 Ref=off

| Peak # | RetTime [min] | Type | Width [min] | Area [mAU*s] | Height [mAU] | Area %  |
|--------|---------------|------|-------------|--------------|--------------|---------|
| 1      | 22.337        | BV   | 0.0994      | 4285.17529   | 663.46387    | 96.6767 |
| 2      | 23.279        | VB   | 0.1123      | 92.88168     | 12.56342     | 2.0955  |
| 3      | 23.747        | BV   | 0.0926      | 54.42215     | 8.99362      | 1.2278  |

Totals : 4432.47912 685.02091

Signal 8: DAD1 H, Sig=320,16 Ref=off

| Peak # | RetTime [min] | Type | Width [min] | Area [mAU*s] | Height [mAU] | Area %  |
|--------|---------------|------|-------------|--------------|--------------|---------|
| 1      | 22.337        | BB   | 0.0992      | 4397.05615   | 681.85901    | 98.3067 |
| 2      | 23.747        | BB   | 0.0954      | 75.73710     | 12.37473     | 1.6933  |

Totals : 4472.79325 694.23374

=====  
\*\*\* End of Report \*\*\*





III-87 conc.10.fid

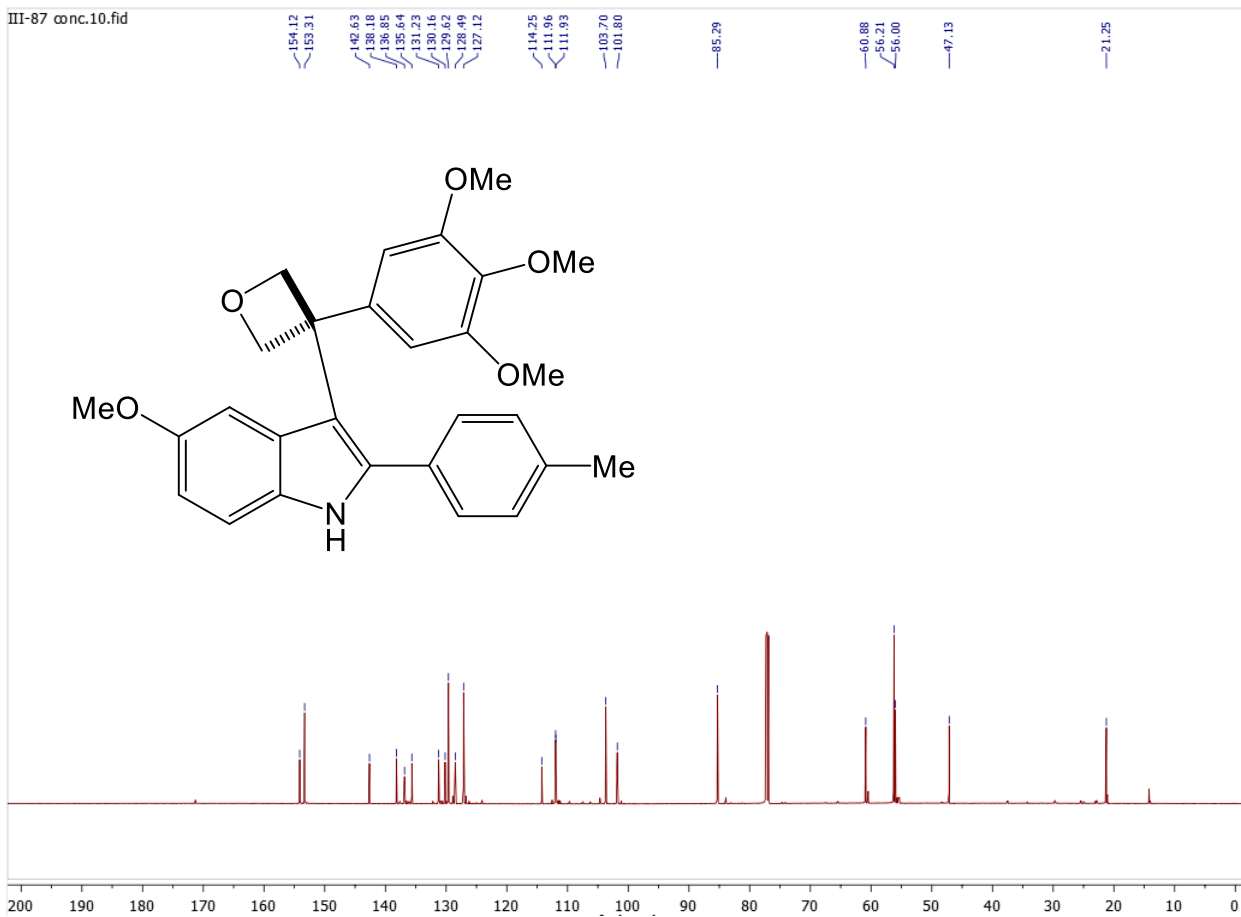

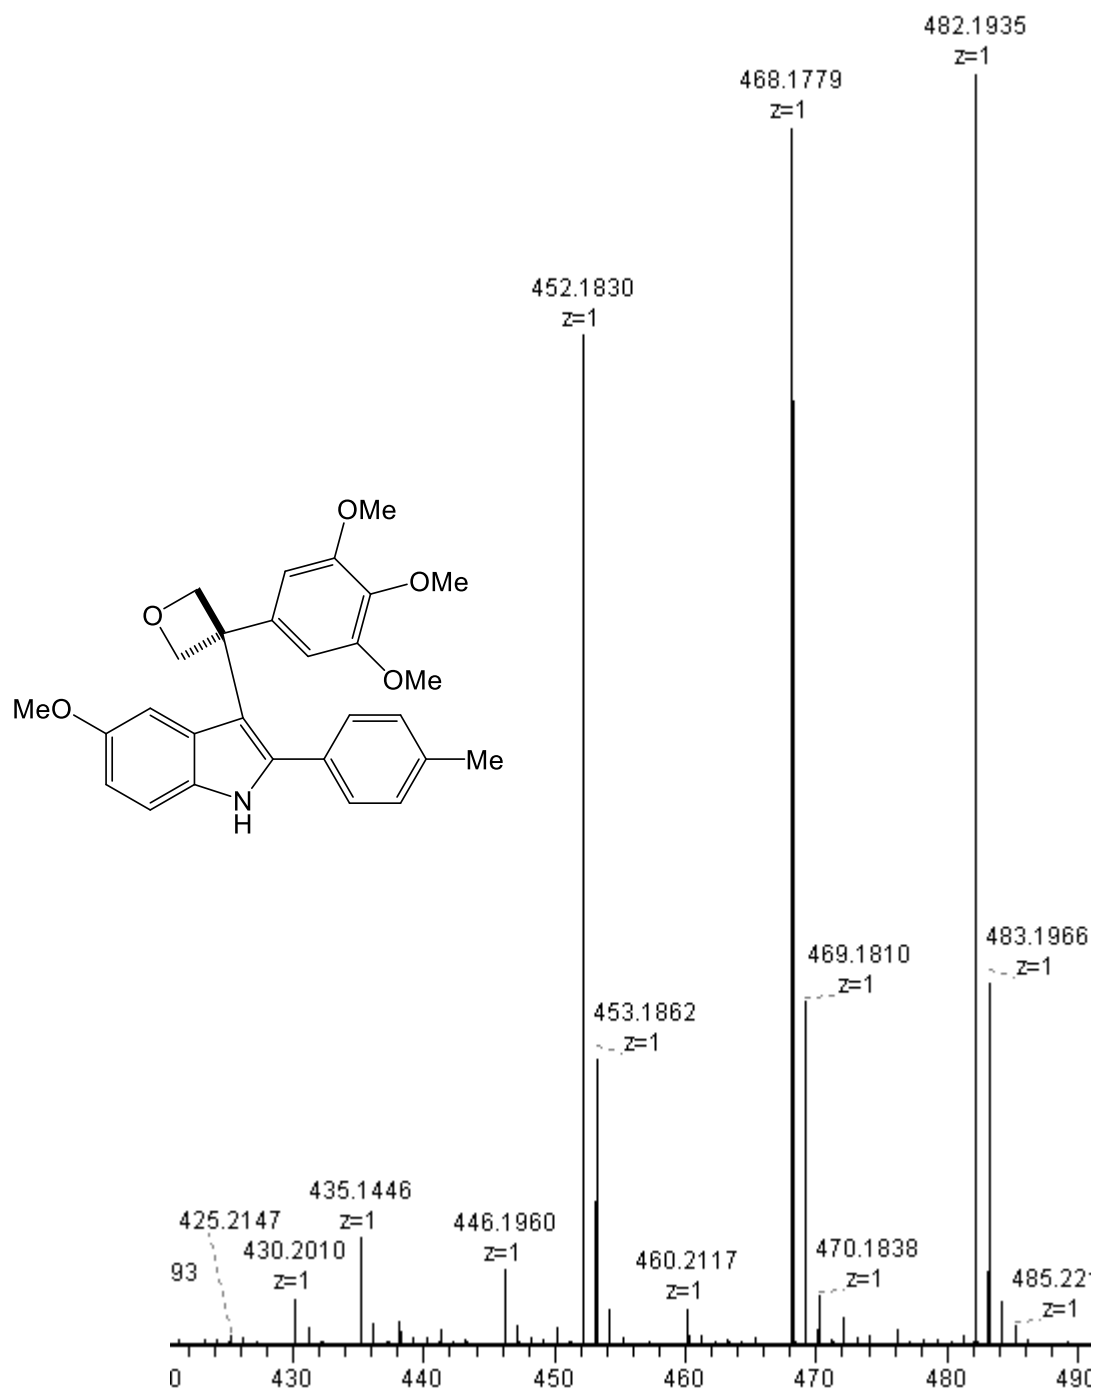

Data File C:\Chem32\1\Data\Ricardo\WR-III-87.D  
Sample Name: WR-III-87

=====  
Acq. Operator : SYSTEM  
Sample Operator : SYSTEM  
Acq. Instrument : 1200 HPLC                      Location : 1  
Injection Date : 7/31/2020 2:13:12 PM                      Inj Volume : No inj  
Method : C:\Chem32\1\Methods\GRAD 2 50-90 ACN.M  
Last changed : 4/30/2014 1:53:57 AM by ERICAP  
Sample Info : 50-90 ACN:WATER

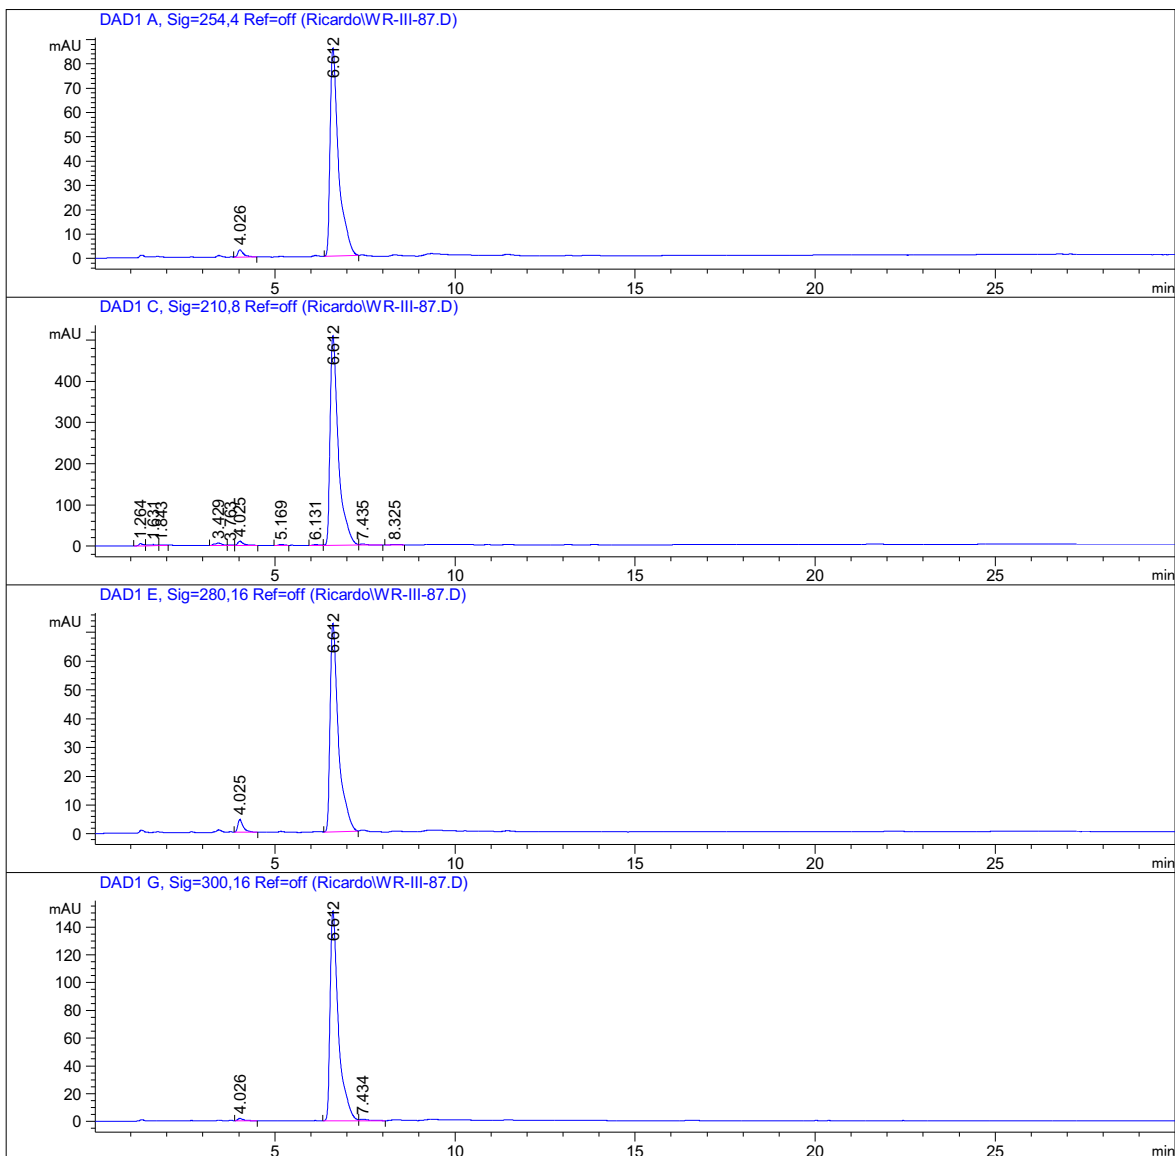

Data File C:\Chem32\1\Data\Ricardo\WR-III-87.D  
 Sample Name: WR-III-87

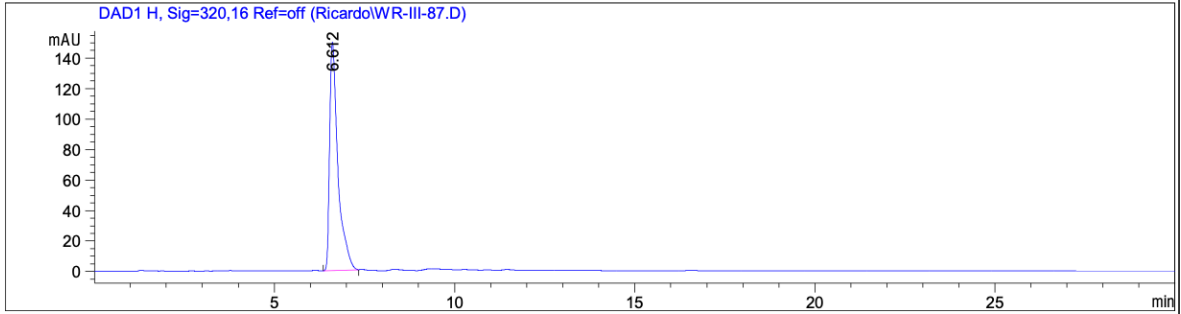

=====  
 Area Percent Report  
 =====

Sorted By : Signal  
 Multiplier : 1.0000  
 Dilution : 1.0000  
 Sample Amount : 1.00000 [ng/ul] (not used in calc.)  
 Use Multiplier & Dilution Factor with ISTDs

Signal 1: DAD1 A, Sig=254,4 Ref=off

| Peak # | RetTime [min] | Type | Width [min] | Area [mAU*s] | Height [mAU] | Area %  |
|--------|---------------|------|-------------|--------------|--------------|---------|
| 1      | 4.026         | BB   | 0.1617      | 32.49809     | 2.96934      | 2.2947  |
| 2      | 6.612         | BB   | 0.2367      | 1383.73792   | 85.57095     | 97.7053 |

Totals : 1416.23600 88.54029

Signal 2: DAD1 C, Sig=210,8 Ref=off

| Peak # | RetTime [min] | Type | Width [min] | Area [mAU*s] | Height [mAU] | Area %  |
|--------|---------------|------|-------------|--------------|--------------|---------|
| 1      | 1.264         | BV   | 0.1150      | 46.49942     | 5.83297      | 0.5480  |
| 2      | 1.631         | VV   | 0.2115      | 38.71789     | 2.28751      | 0.4563  |
| 3      | 1.843         | VV   | 0.1425      | 18.79692     | 1.78976      | 0.2215  |
| 4      | 3.429         | BV   | 0.2192      | 90.58074     | 6.03350      | 1.0675  |
| 5      | 3.763         | VV   | 0.1266      | 12.87899     | 1.49301      | 0.1518  |
| 6      | 4.025         | VB   | 0.1706      | 119.14664    | 10.17709     | 1.4041  |
| 7      | 5.169         | BB   | 0.1560      | 23.23737     | 2.33717      | 0.2738  |
| 8      | 6.131         | BV   | 0.1952      | 23.11951     | 1.78397      | 0.2725  |
| 9      | 6.612         | VV   | 0.2324      | 8053.87842   | 509.51855    | 94.9124 |
| 10     | 7.435         | VB   | 0.2111      | 39.75042     | 2.70999      | 0.4684  |
| 11     | 8.325         | BB   | 0.2260      | 18.98729     | 1.35048      | 0.2238  |

Totals : 8485.59361 545.31401

Data File C:\Chem32\1\Data\Ricardo\WR-III-87.D  
Sample Name: WR-III-87

Signal 3: DAD1 E, Sig=280,16 Ref=off

| Peak # | RetTime [min] | Type | Width [min] | Area [mAU*s] | Height [mAU] | Area %  |
|--------|---------------|------|-------------|--------------|--------------|---------|
| 1      | 4.025         | BB   | 0.1574      | 46.51346     | 4.39775      | 3.8769  |
| 2      | 6.612         | BB   | 0.2319      | 1153.25342   | 72.37313     | 96.1231 |

Totals : 1199.76688 76.77088

Signal 4: DAD1 G, Sig=300,16 Ref=off

| Peak # | RetTime [min] | Type | Width [min] | Area [mAU*s] | Height [mAU] | Area %  |
|--------|---------------|------|-------------|--------------|--------------|---------|
| 1      | 4.026         | BB   | 0.1592      | 17.16919     | 1.60029      | 0.7054  |
| 2      | 6.612         | BV   | 0.2314      | 2400.26563   | 151.02991    | 98.6166 |
| 3      | 7.434         | VB   | 0.2196      | 16.50172     | 1.07221      | 0.6780  |

Totals : 2433.93654 153.70241

Signal 5: DAD1 H, Sig=320,16 Ref=off

| Peak # | RetTime [min] | Type | Width [min] | Area [mAU*s] | Height [mAU] | Area %   |
|--------|---------------|------|-------------|--------------|--------------|----------|
| 1      | 6.612         | BB   | 0.2317      | 2382.69189   | 149.70708    | 100.0000 |

Totals : 2382.69189 149.70708

=====  
\*\*\* End of Report \*\*\*

# Compound 5e

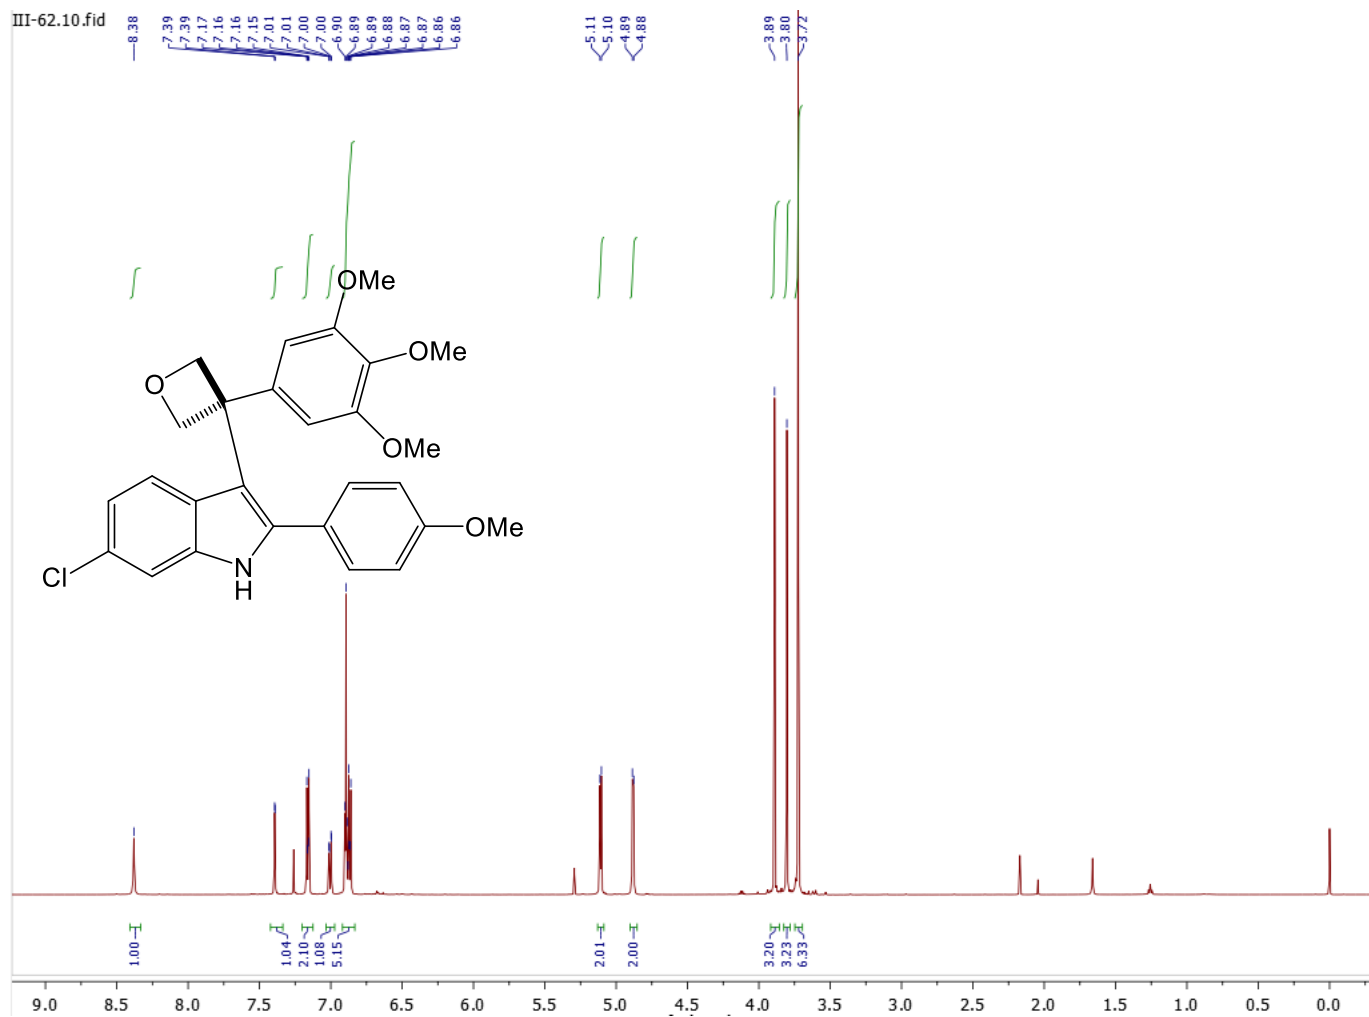

III-62.20.fid

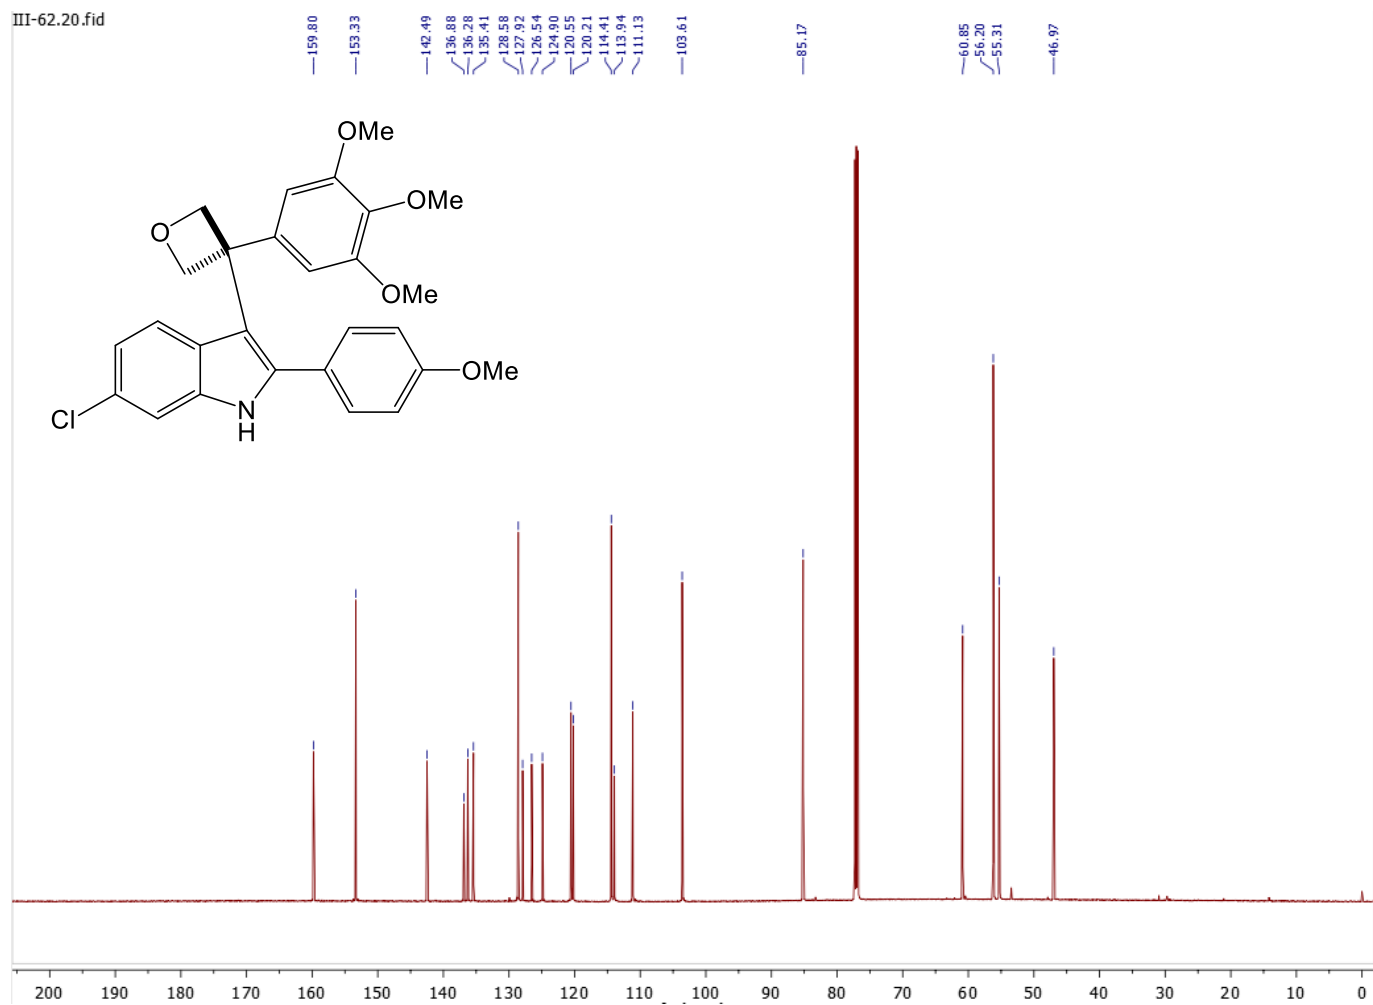



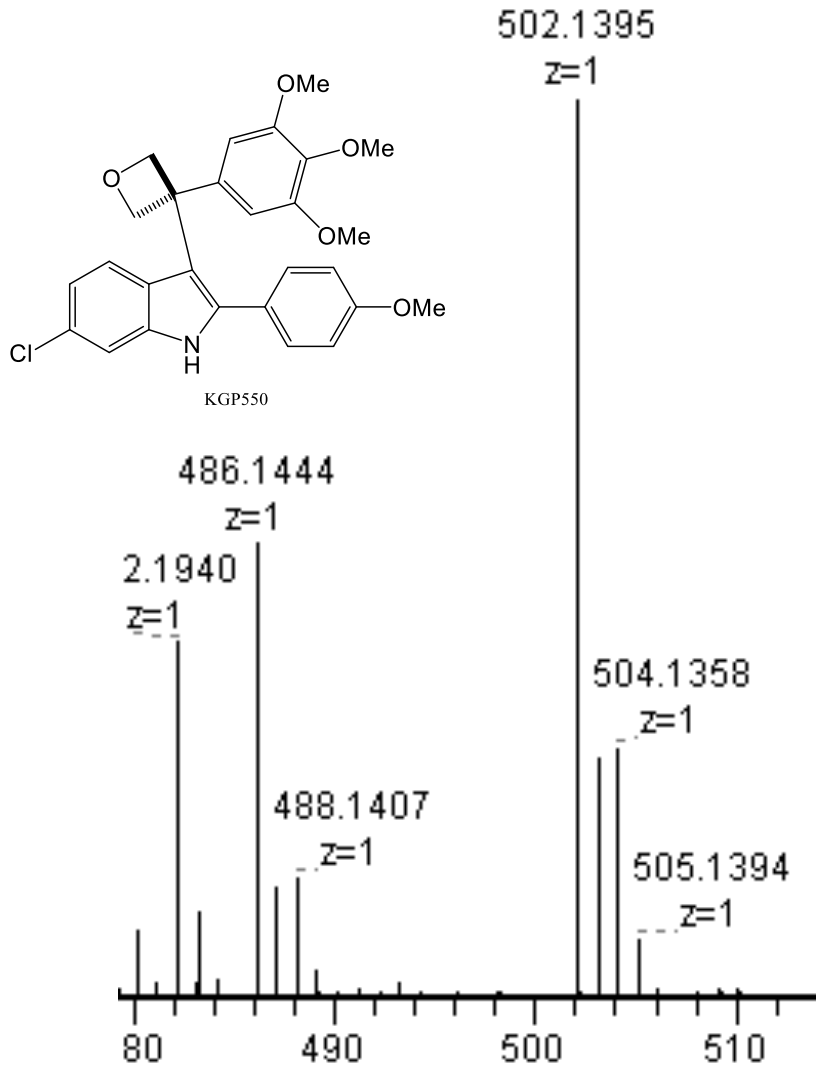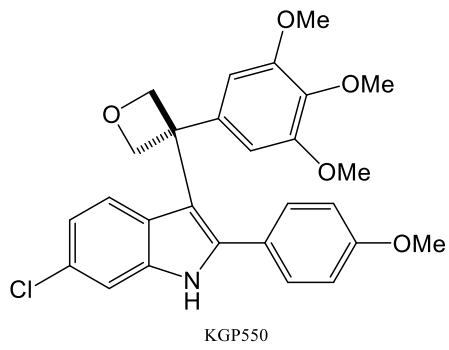



Data File C:\Chem32\1\Data\WEN\wr-iii-62-2.D  
Sample Name: wr-iii-62-2

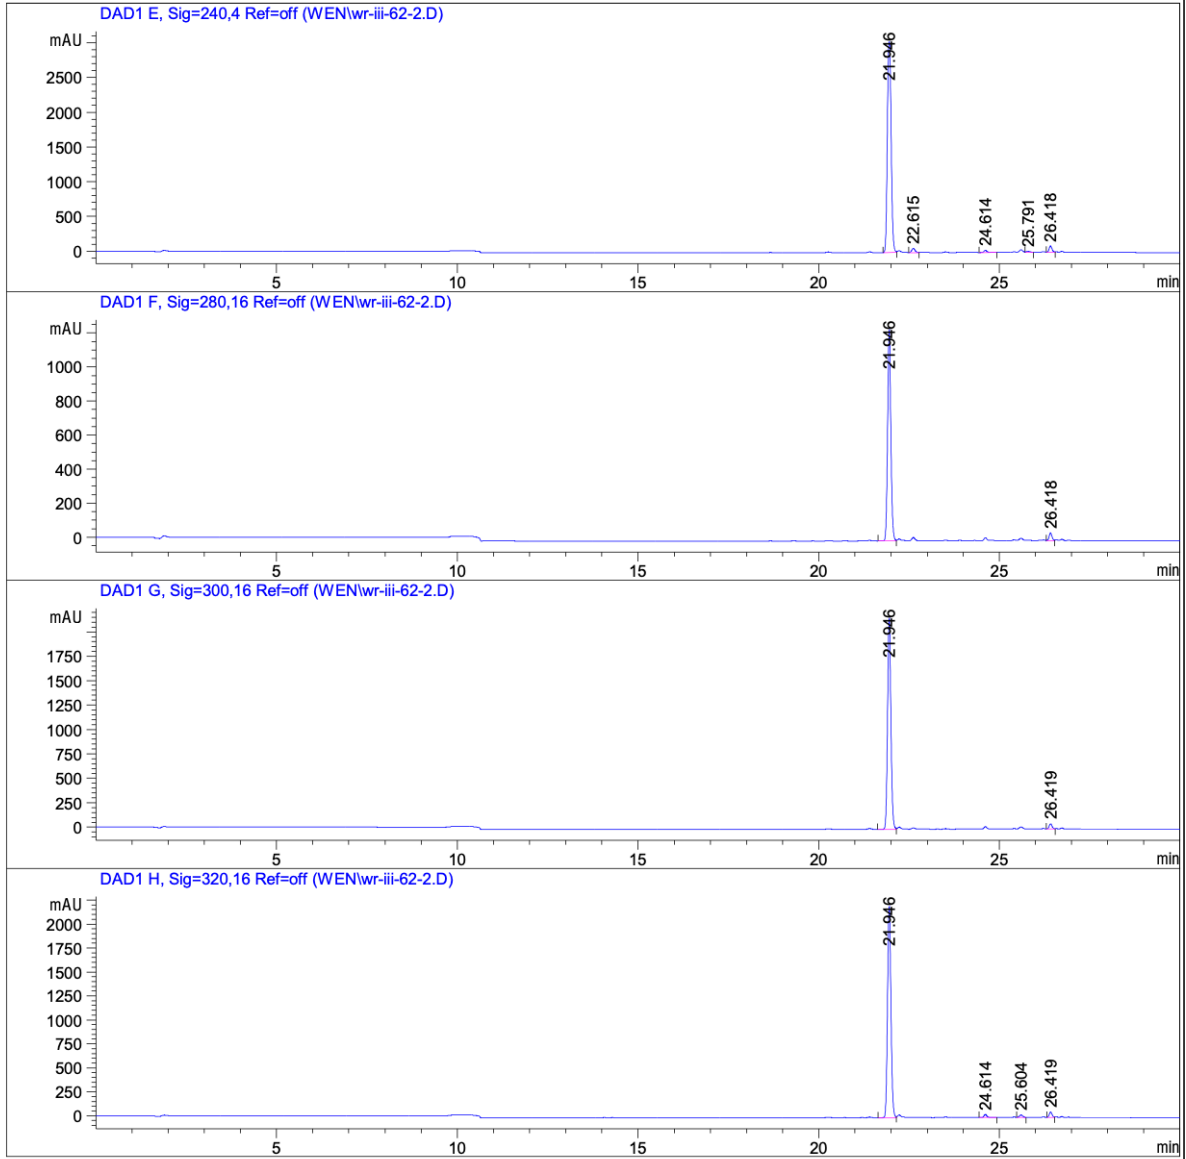

=====  
Area Percent Report  
=====

Sorted By : Signal  
Multiplier : 1.0000  
Dilution : 1.0000  
Sample Amount : 1.00000 [ng/ul] (not used in calc.)  
Use Multiplier & Dilution Factor with ISTDs

Sample Name: wr-iii-62-2

Signal 1: DAD1 A, Sig=254,4 Ref=off

| Peak # | RetTime [min] | Type | Width [min] | Area [mAU*s] | Height [mAU] | Area %  |
|--------|---------------|------|-------------|--------------|--------------|---------|
| 1      | 21.946        | BV   | 0.1138      | 1.95699e4    | 2723.57715   | 95.3497 |
| 2      | 24.614        | BV   | 0.0929      | 240.41814    | 39.56171     | 1.1714  |
| 3      | 25.604        | VV   | 0.1003      | 235.66830    | 36.03448     | 1.1482  |
| 4      | 26.418        | BV   | 0.0840      | 478.34830    | 87.21782     | 2.3306  |

Totals : 2.05244e4 2886.39116

Signal 2: DAD1 B, Sig=254,16 Ref=off

| Peak # | RetTime [min] | Type | Width [min] | Area [mAU*s] | Height [mAU] | Area %  |
|--------|---------------|------|-------------|--------------|--------------|---------|
| 1      | 21.946        | BV   | 0.1136      | 1.90123e4    | 2653.70630   | 97.5943 |
| 2      | 26.418        | BV   | 0.0841      | 468.65009    | 85.34182     | 2.4057  |

Totals : 1.94810e4 2739.04812

Signal 3: DAD1 C, Sig=210,8 Ref=off

| Peak # | RetTime [min] | Type | Width [min] | Area [mAU*s] | Height [mAU] | Area %  |
|--------|---------------|------|-------------|--------------|--------------|---------|
| 1      | 21.945        | BV   | 0.1619      | 2.79597e4    | 2813.27002   | 92.3256 |
| 2      | 22.222        | VB   | 0.1130      | 439.50073    | 56.33816     | 1.4513  |
| 3      | 22.615        | BV   | 0.0976      | 568.56976    | 90.11728     | 1.8775  |
| 4      | 22.836        | VV   | 0.0994      | 48.75050     | 7.35133      | 0.1610  |
| 5      | 24.614        | BB   | 0.1006      | 342.69827    | 50.85356     | 1.1316  |
| 6      | 26.416        | BV   | 0.0832      | 879.20251    | 162.38976    | 2.9032  |
| 7      | 26.581        | VV   | 0.0817      | 45.38559     | 8.31196      | 0.1499  |

Totals : 3.02838e4 3188.63206

Signal 4: DAD1 D, Sig=230,16 Ref=off

| Peak # | RetTime [min] | Type | Width [min] | Area [mAU*s] | Height [mAU] | Area %  |
|--------|---------------|------|-------------|--------------|--------------|---------|
| 1      | 21.946        | BV   | 0.1229      | 2.28210e4    | 2994.35864   | 94.9970 |
| 2      | 22.615        | BV   | 0.0977      | 389.15082    | 61.61694     | 1.6199  |
| 3      | 24.614        | BB   | 0.0997      | 219.72202    | 32.97391     | 0.9146  |
| 4      | 25.410        | BV   | 0.0837      | 45.79996     | 8.65896      | 0.1907  |
| 5      | 26.417        | BV   | 0.0841      | 519.87256    | 94.68971     | 2.1641  |
| 6      | 26.581        | VV   | 0.0789      | 27.31297     | 5.23220      | 0.1137  |

Totals : 2.40229e4 3197.53037

Signal 5: DAD1 E, Sig=240,4 Ref=off

| Peak # | RetTime [min] | Type | Width [min] | Area [mAU*s] | Height [mAU] | Area %  |
|--------|---------------|------|-------------|--------------|--------------|---------|
| 1      | 21.946        | BV   | 0.1212      | 2.26830e4    | 3033.90234   | 95.0158 |
| 2      | 22.615        | BV   | 0.0975      | 383.66473    | 60.86258     | 1.6071  |
| 3      | 24.614        | BB   | 0.0996      | 216.13211    | 32.48325     | 0.9053  |
| 4      | 25.791        | VB   | 0.0922      | 92.76106     | 14.99069     | 0.3886  |
| 5      | 26.418        | BV   | 0.0849      | 497.31873    | 89.36918     | 2.0832  |

Totals : 2.38729e4 3231.60804

Signal 6: DAD1 F, Sig=280,16 Ref=off

| Peak # | RetTime [min] | Type | Width [min] | Area [mAU*s] | Height [mAU] | Area %  |
|--------|---------------|------|-------------|--------------|--------------|---------|
| 1      | 21.946        | BV   | 0.0986      | 7922.77832   | 1238.73938   | 97.0708 |
| 2      | 26.418        | BV   | 0.0832      | 239.07545    | 44.10551     | 2.9292  |

Totals : 8161.85378 1282.84489

Signal 7: DAD1 G, Sig=300,16 Ref=off

| Peak # | RetTime [min] | Type | Width [min] | Area [mAU*s] | Height [mAU] | Area %  |
|--------|---------------|------|-------------|--------------|--------------|---------|
| 1      | 21.946        | BV   | 0.1030      | 1.42424e4    | 2156.98999   | 97.9902 |
| 2      | 26.419        | BV   | 0.0838      | 292.11990    | 53.43065     | 2.0098  |

Totals : 1.45345e4 2210.42064

Signal 8: DAD1 H, Sig=320,16 Ref=off

| Peak # | RetTime [min] | Type | Width [min] | Area [mAU*s] | Height [mAU] | Area %  |
|--------|---------------|------|-------------|--------------|--------------|---------|
| 1      | 21.946        | BV   | 0.1074      | 1.49590e4    | 2199.20264   | 95.5721 |
| 2      | 24.614        | BV   | 0.0967      | 208.00969    | 32.48122     | 1.3290  |
| 3      | 25.604        | VV   | 0.1024      | 176.03522    | 26.19173     | 1.1247  |
| 4      | 26.419        | BV   | 0.0856      | 309.01193    | 56.70751     | 1.9743  |

Totals : 1.56520e4 2314.58310

=====  
\*\*\* End of Report \*\*\*

# Compound 5f

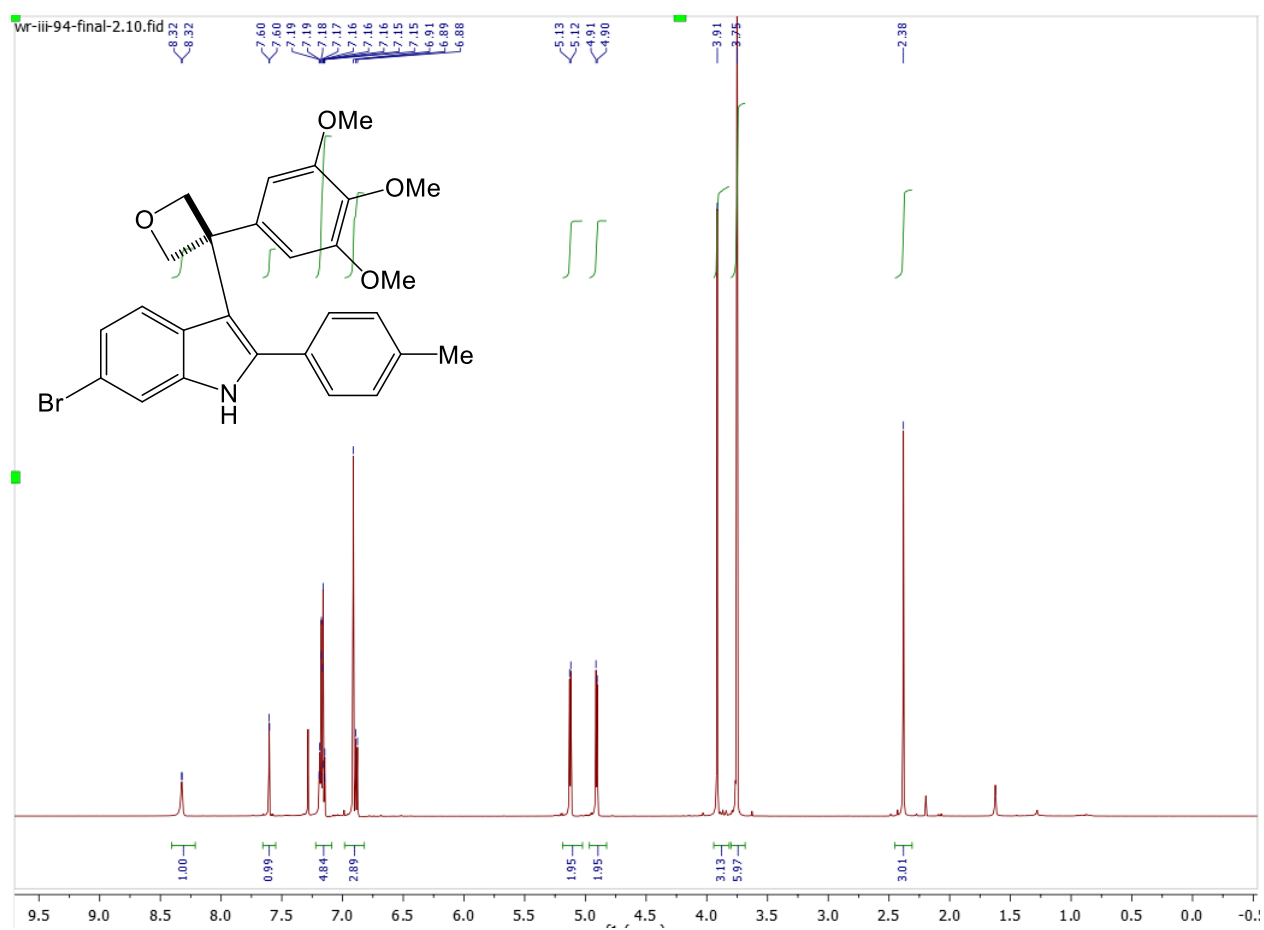

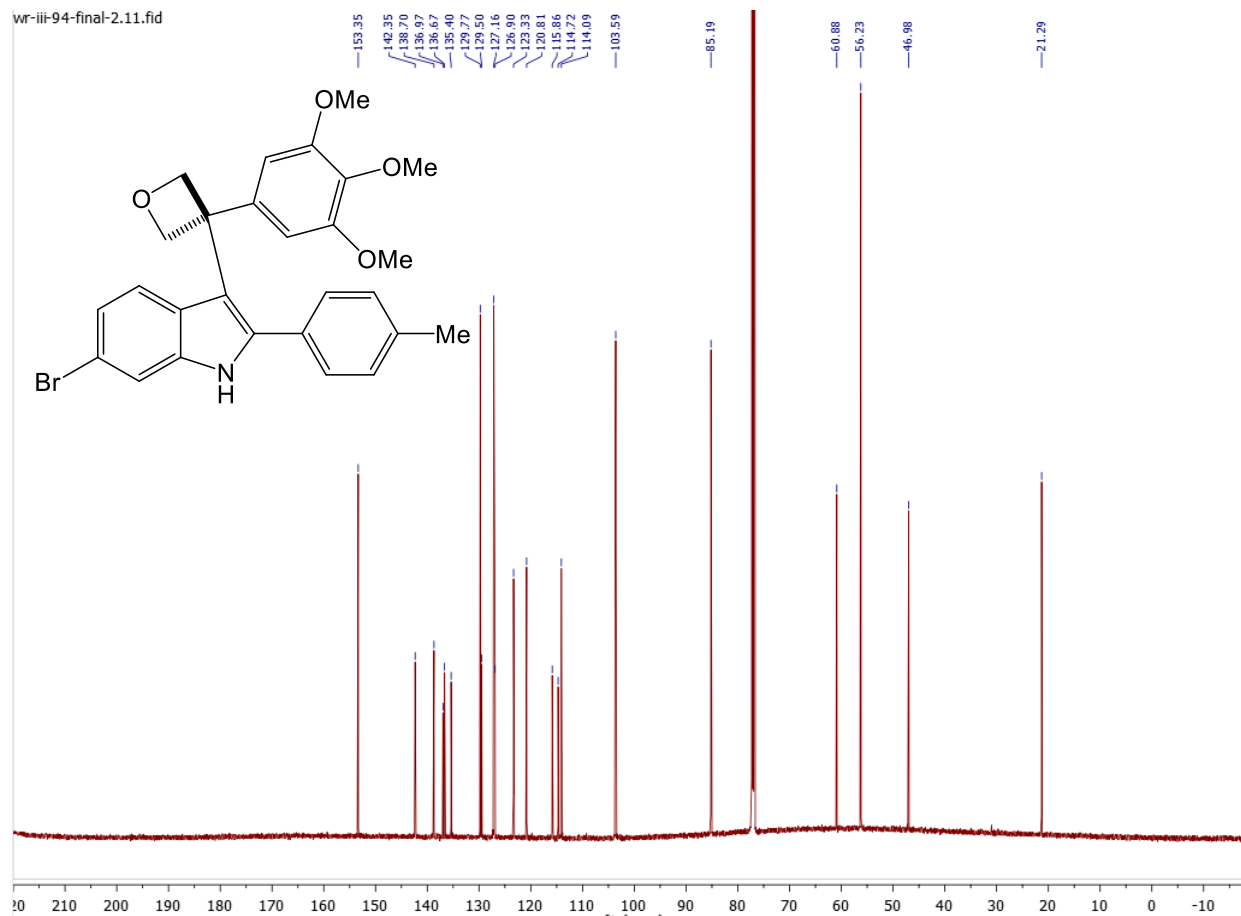

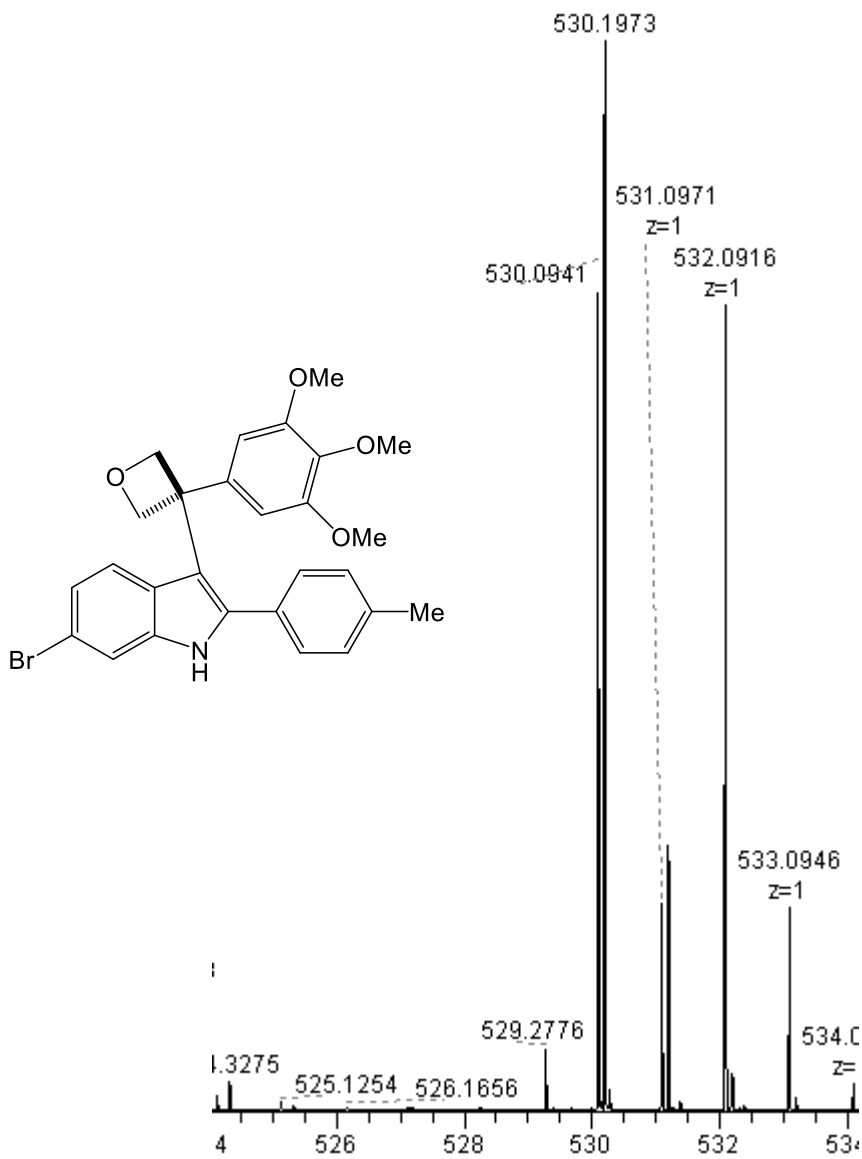



Data File C:\Chem32\1\Data\Jenny\wr-iii-94.D  
Sample Name: wr-iii-94

=====

Acq. Operator : SYSTEM  
Sample Operator : SYSTEM  
Acq. Instrument : 1200 HPLC                      Location : 1  
Injection Date : 3/6/2023 10:03:25 AM                      Inj Volume : No inj

Acq. Method : C:\Chem32\1\Methods\MASTERMETHOD2.M  
Last changed : 12/2/2015 12:37:42 PM by Eric Lin  
Analysis Method : C:\Chem32\1\Methods\RT-ACNWASH 2.M  
Last changed : 7/9/2015 2:27:22 PM by Blake  
Method Info : General Column Wash Method

Additional Info : Peak(s) manually integrated

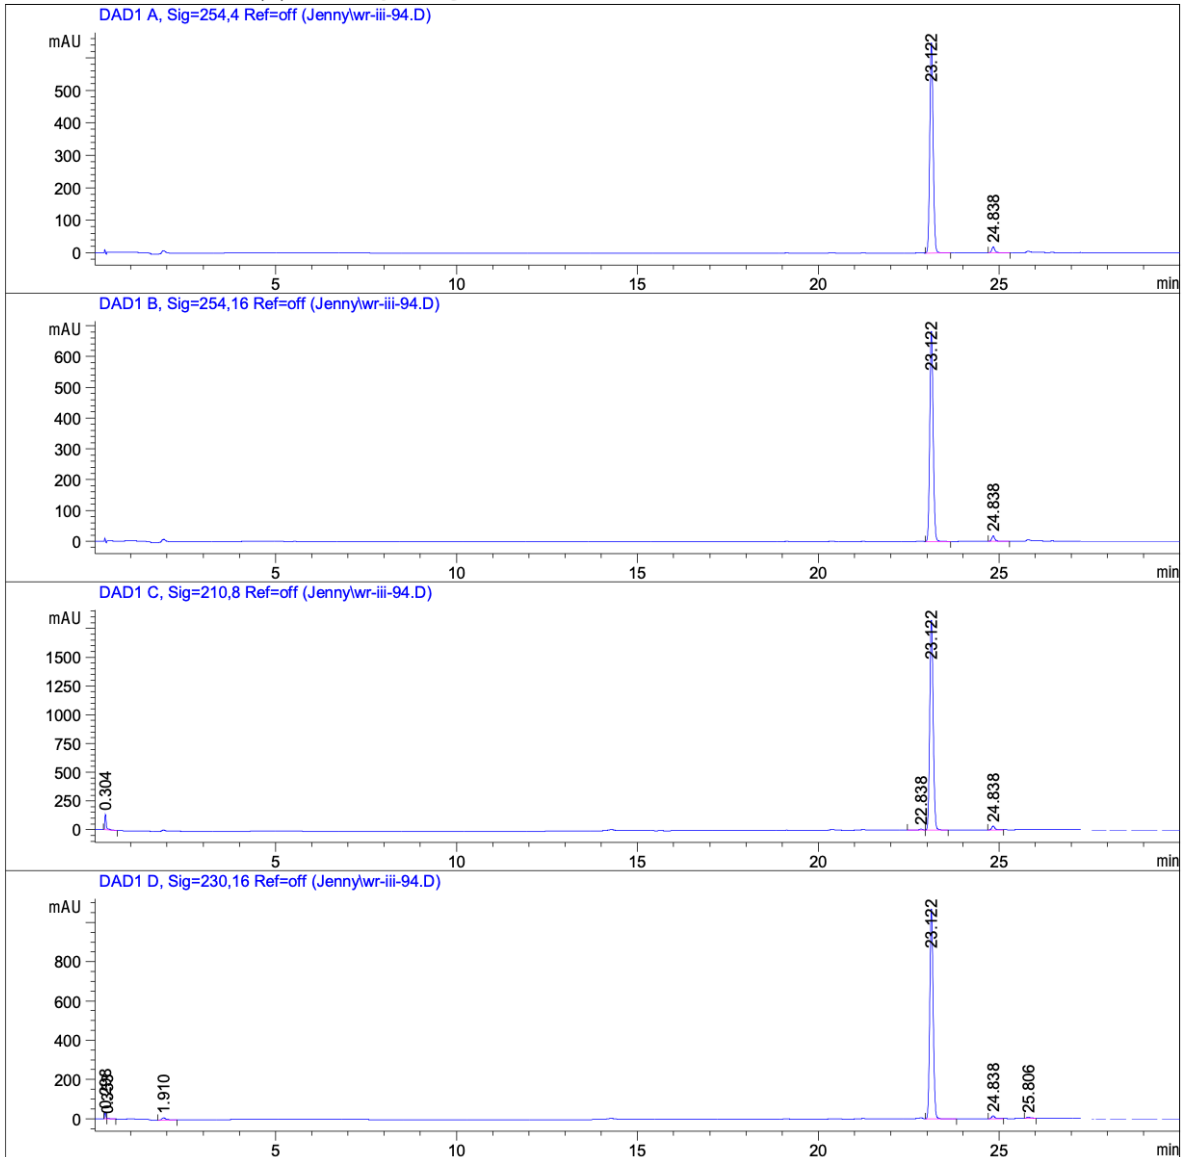

Data File C:\Chem32\1\Data\Jenny\wr-iii-94.D  
Sample Name: wr-iii-94

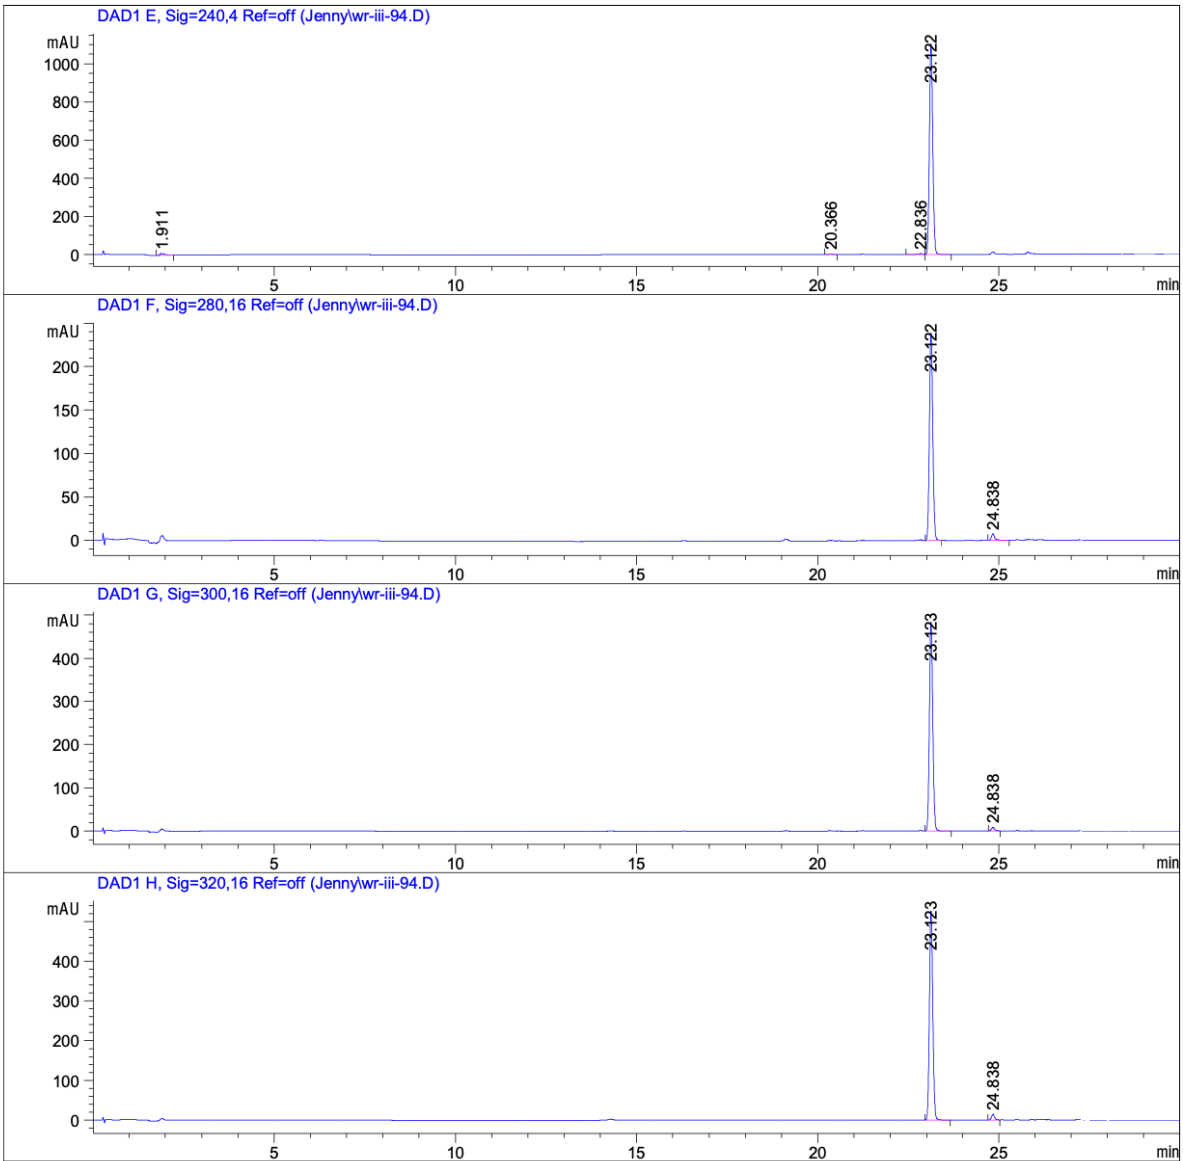

=====  
Area Percent Report  
=====

Sorted By : Signal  
Multiplier : 1.0000  
Dilution : 1.0000  
Sample Amount: : 1.00000 [ng/ul] (not used in calc.)  
Use Multiplier & Dilution Factor with ISTDs

Data File C:\Chem32\1\Data\Jenny\wr-iii-94.D  
Sample Name: wr-iii-94

Signal 1: DAD1 A, Sig=254,4 Ref=off

| Peak # | RetTime [min] | Type | Width [min] | Area [mAU*s] | Height [mAU] | Area %  |
|--------|---------------|------|-------------|--------------|--------------|---------|
| 1      | 23.122        | VB   | 0.0982      | 4125.98682   | 648.82428    | 97.2443 |
| 2      | 24.838        | BB   | 0.0970      | 116.92339    | 18.19571     | 2.7557  |

Totals : 4242.91021 667.01999

Signal 2: DAD1 B, Sig=254,16 Ref=off

| Peak # | RetTime [min] | Type | Width [min] | Area [mAU*s] | Height [mAU] | Area %  |
|--------|---------------|------|-------------|--------------|--------------|---------|
| 1      | 23.122        | VB   | 0.0982      | 4349.37842   | 684.22589    | 97.4473 |
| 2      | 24.838        | BB   | 0.0973      | 113.93318    | 17.65711     | 2.5527  |

Totals : 4463.31160 701.88300

Signal 3: DAD1 C, Sig=210,8 Ref=off

| Peak # | RetTime [min] | Type | Width [min] | Area [mAU*s] | Height [mAU] | Area %  |
|--------|---------------|------|-------------|--------------|--------------|---------|
| 1      | 0.304         | BB   | 0.0475      | 402.72342    | 132.38976    | 3.2112  |
| 2      | 22.838        | BV   | 0.1092      | 68.90028     | 9.21509      | 0.5494  |
| 3      | 23.122        | VB   | 0.0995      | 1.18459e4    | 1829.84180   | 94.4569 |
| 4      | 24.838        | BV   | 0.0977      | 223.53879    | 34.43666     | 1.7825  |

Totals : 1.25411e4 2005.88331

Signal 4: DAD1 D, Sig=230,16 Ref=off

| Peak # | RetTime [min] | Type | Width [min] | Area [mAU*s] | Height [mAU] | Area %  |
|--------|---------------|------|-------------|--------------|--------------|---------|
| 1      | 0.298         | BV   | 0.0410      | 75.36086     | 30.35119     | 1.0520  |
| 2      | 0.353         | VB   | 0.0904      | 13.37091     | 2.28021      | 0.1866  |
| 3      | 1.910         | BB   | 0.1407      | 103.51208    | 11.11344     | 1.4449  |
| 4      | 23.122        | VB   | 0.0981      | 6814.51074   | 1072.81458   | 95.1230 |
| 5      | 24.838        | BV   | 0.1033      | 107.00661    | 15.36334     | 1.4937  |
| 6      | 25.806        | BB   | 0.1063      | 50.12897     | 6.77747      | 0.6997  |

Totals : 7163.89017 1138.70023

Signal 5: DAD1 E, Sig=240,4 Ref=off

| Peak # | RetTime [min] | Type | Width [min] | Area [mAU*s] | Height [mAU] | Area %  |
|--------|---------------|------|-------------|--------------|--------------|---------|
| 1      | 1.911         | BB   | 0.1368      | 92.79232     | 10.33375     | 1.2916  |
| 2      | 20.366        | BB   | 0.1573      | 22.33437     | 2.34197      | 0.3109  |
| 3      | 22.836        | BV   | 0.1278      | 41.62230     | 4.59004      | 0.5793  |
| 4      | 23.122        | VB   | 0.0980      | 7027.65430   | 1107.47095   | 97.8182 |

Totals : 7184.40328 1124.73671

Signal 6: DAD1 F, Sig=280,16 Ref=off

| Peak # | RetTime [min] | Type | Width [min] | Area [mAU*s] | Height [mAU] | Area %  |
|--------|---------------|------|-------------|--------------|--------------|---------|
| 1      | 23.122        | BB   | 0.0978      | 1515.68567   | 239.59666    | 96.7121 |
| 2      | 24.838        | BB   | 0.1013      | 51.52903     | 7.57881      | 3.2879  |

Totals : 1567.21469 247.17548

Signal 7: DAD1 G, Sig=300,16 Ref=off

| Peak # | RetTime [min] | Type | Width [min] | Area [mAU*s] | Height [mAU] | Area %  |
|--------|---------------|------|-------------|--------------|--------------|---------|
| 1      | 23.123        | VB   | 0.0980      | 3073.97559   | 484.62503    | 98.3636 |
| 2      | 24.838        | BB   | 0.0920      | 51.13946     | 8.52290      | 1.6364  |

Totals : 3125.11505 493.14793

Signal 8: DAD1 H, Sig=320,16 Ref=off

| Peak # | RetTime [min] | Type | Width [min] | Area [mAU*s] | Height [mAU] | Area %  |
|--------|---------------|------|-------------|--------------|--------------|---------|
| 1      | 23.123        | BB   | 0.0980      | 3347.94092   | 527.78351    | 97.5633 |
| 2      | 24.838        | BB   | 0.0909      | 83.61826     | 14.15893     | 2.4367  |

Totals : 3431.55917 541.94244

=====  
\*\*\* End of Report \*\*\*

# Compound 5g

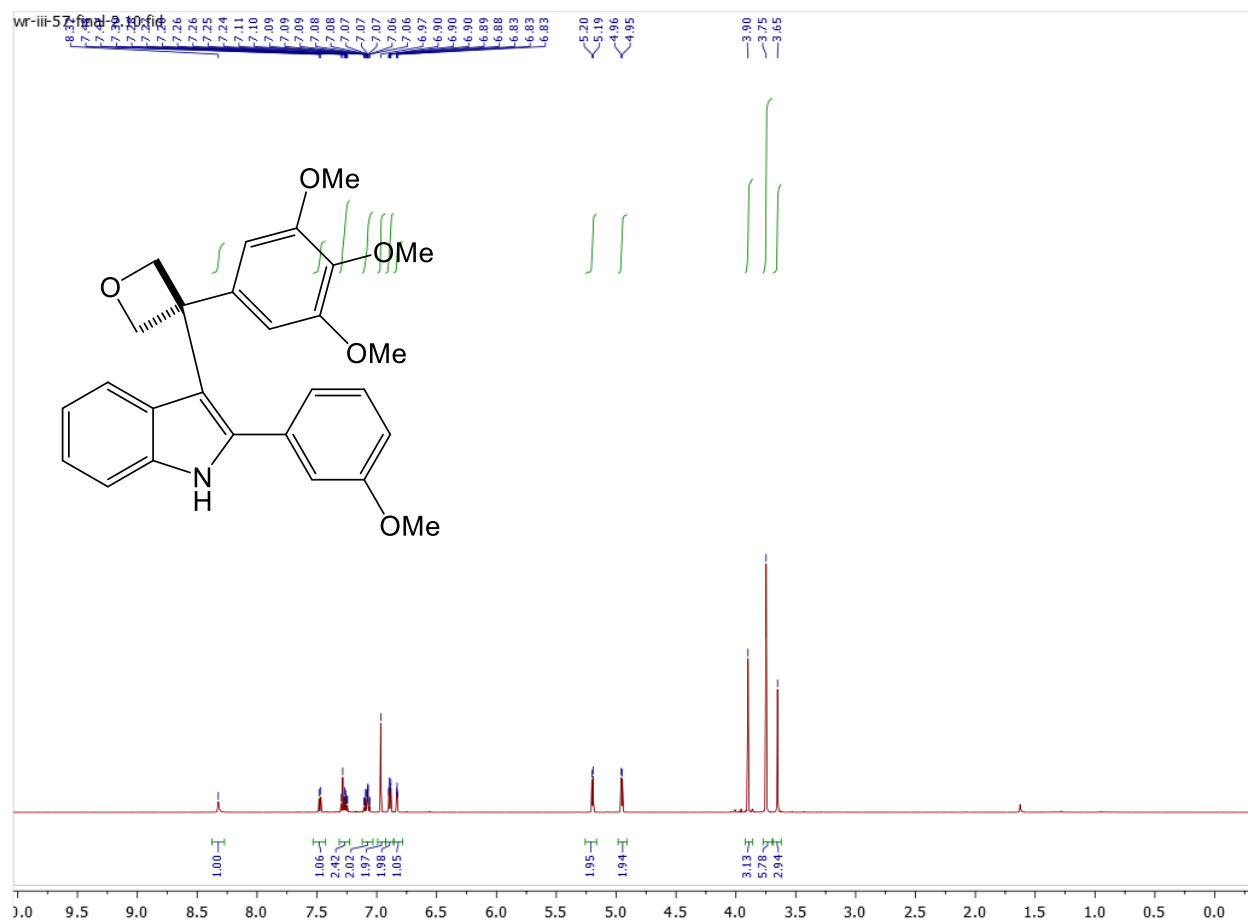

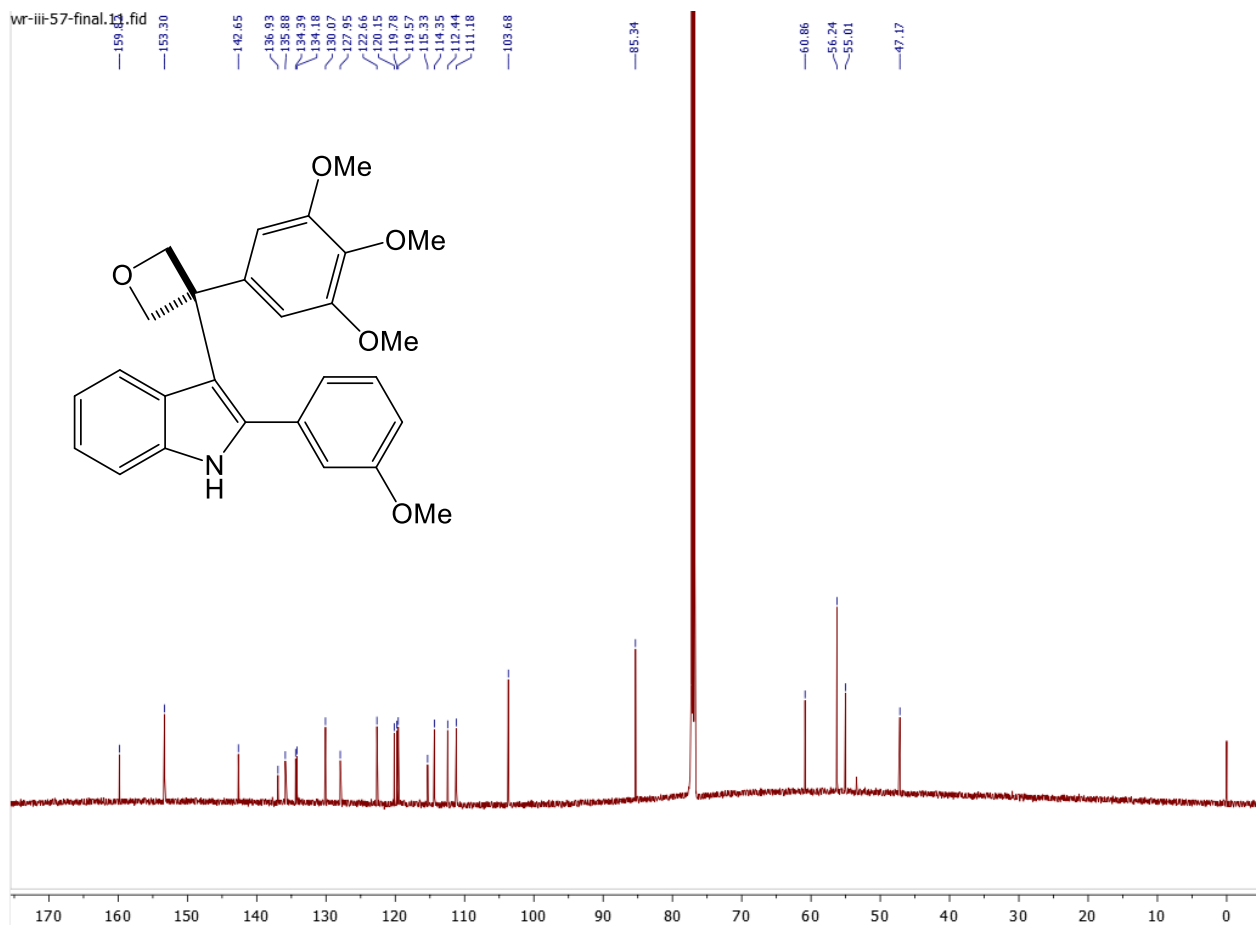

T: 59.084 ST: 0.79 uS: 1 CS: 1 AMW: 467.17 NL: 1.39E7  
+ p ESI Full ms [200.00-600.00]  
I=3d RF=2300V TmpDiff Lock(In)391.3, 1f1, +2ppm)

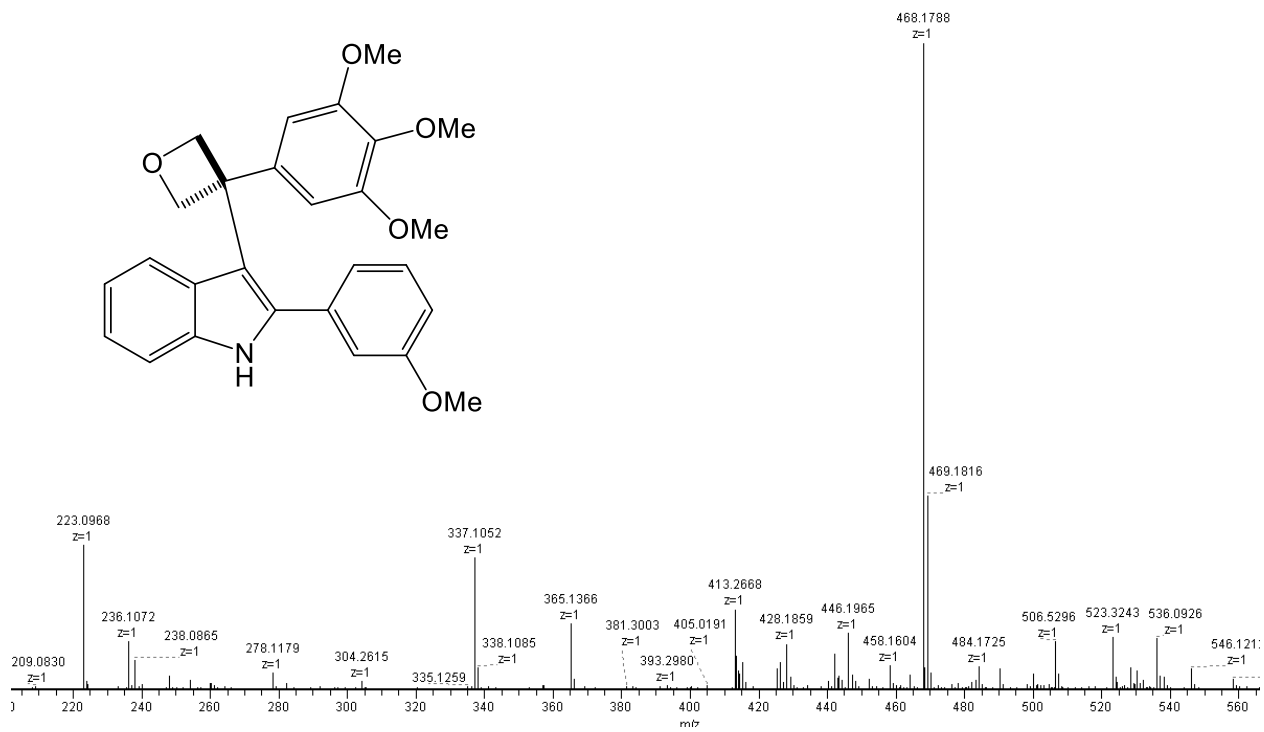





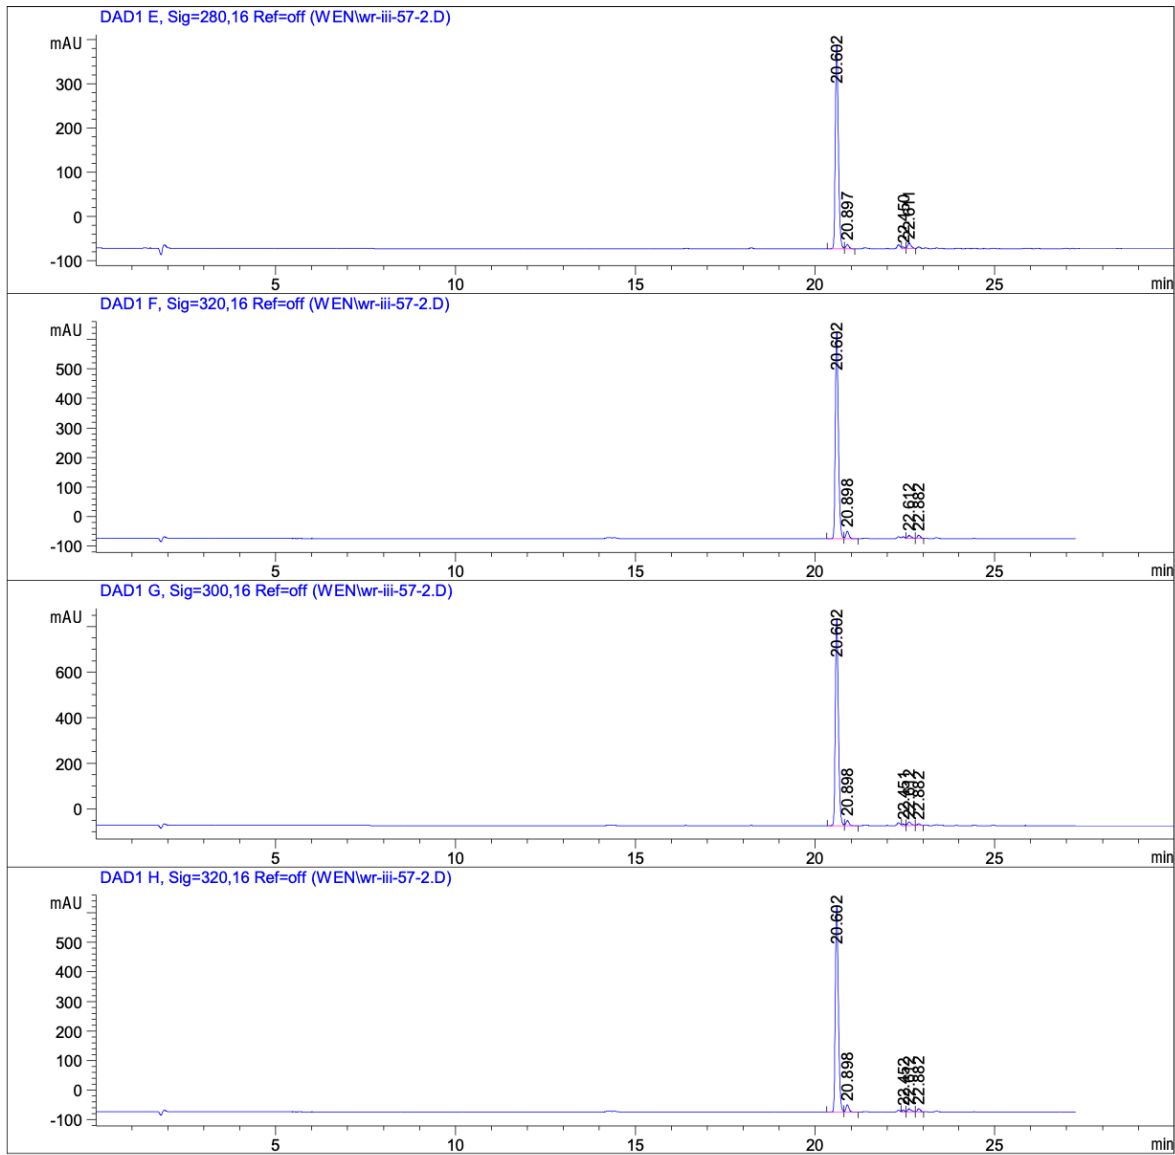

=====  
Area Percent Report  
=====

Sorted By : Signal  
Multiplier : 1.0000  
Dilution : 1.0000  
Sample Amount: : 1.00000 [ng/ul] (not used in calc.)  
Use Multiplier & Dilution Factor with ISTDs

Data File C:\Chem32\1\Data\WEN\wr-iii-57-2.D  
Sample Name: wr-iii-57-2

Signal 1: DAD1 A, Sig=254,4 Ref=off

| Peak # | RetTime [min] | Type | Width [min] | Area [mAU*s] | Height [mAU] | Area %  |
|--------|---------------|------|-------------|--------------|--------------|---------|
| 1      | 20.602        | BV   | 0.0908      | 3384.96973   | 574.10345    | 95.7475 |
| 2      | 20.898        | VB   | 0.0893      | 74.94018     | 12.60932     | 2.1198  |
| 3      | 22.451        | VV   | 0.0787      | 29.80915     | 5.72974      | 0.8432  |
| 4      | 22.882        | BV   | 0.0861      | 45.58938     | 8.30036      | 1.2895  |

Totals : 3535.30844 600.74287

Signal 2: DAD1 B, Sig=254,16 Ref=off

| Peak # | RetTime [min] | Type | Width [min] | Area [mAU*s] | Height [mAU] | Area %  |
|--------|---------------|------|-------------|--------------|--------------|---------|
| 1      | 20.602        | BV   | 0.0908      | 3713.72681   | 629.62360    | 92.3811 |
| 2      | 20.897        | VB   | 0.0903      | 76.63709     | 12.71002     | 1.9064  |
| 3      | 21.391        | BB   | 0.1113      | 20.75458     | 2.77405      | 0.5163  |
| 4      | 22.320        | BV   | 0.0836      | 58.92662     | 10.80842     | 1.4658  |
| 5      | 22.611        | VB   | 0.1014      | 103.29552    | 15.16912     | 2.5695  |
| 6      | 22.882        | BV   | 0.0861      | 46.66776     | 8.48902      | 1.1609  |

Totals : 4020.00837 679.57422

Signal 3: DAD1 C, Sig=210,8 Ref=off

| Peak # | RetTime [min] | Type | Width [min] | Area [mAU*s] | Height [mAU] | Area %  |
|--------|---------------|------|-------------|--------------|--------------|---------|
| 1      | 20.602        | BV   | 0.1109      | 1.59760e4    | 2302.89453   | 95.6203 |
| 2      | 20.897        | VV   | 0.0936      | 216.18344    | 34.27876     | 1.2939  |
| 3      | 22.321        | BV   | 0.0826      | 105.30437    | 19.61131     | 0.6303  |
| 4      | 22.614        | VB   | 0.1019      | 220.87402    | 31.48221     | 1.3220  |
| 5      | 22.882        | BV   | 0.0864      | 189.39507    | 34.33472     | 1.1336  |

Totals : 1.67077e4 2422.60153

Signal 4: DAD1 D, Sig=230,16 Ref=off

| Peak # | RetTime [min] | Type | Width [min] | Area [mAU*s] | Height [mAU] | Area %  |
|--------|---------------|------|-------------|--------------|--------------|---------|
| 1      | 20.602        | BV   | 0.0932      | 1.15400e4    | 1890.37732   | 94.9799 |
| 2      | 20.897        | VB   | 0.0915      | 182.24625    | 29.75588     | 1.5000  |
| 3      | 22.321        | BV   | 0.0822      | 74.02666     | 13.88464     | 0.6093  |
| 4      | 22.452        | VV   | 0.0800      | 63.90585     | 12.03197     | 0.5260  |
| 5      | 22.613        | VB   | 0.1006      | 162.21931    | 23.48679     | 1.3351  |
| 6      | 22.882        | BV   | 0.0863      | 109.05629    | 19.78951     | 0.8976  |

Sample Name: wr-iii-57-2

| Peak # | RetTime [min] | Type | Width [min] | Area [mAU*s] | Height [mAU] | Area % |
|--------|---------------|------|-------------|--------------|--------------|--------|
| 7      | 23.076        | VB   | 0.0831      | 18.47762     | 3.41738      | 0.1521 |

Totals : 1.21499e4 1992.74349

Signal 5: DAD1 E, Sig=280,16 Ref=off

| Peak # | RetTime [min] | Type | Width [min] | Area [mAU*s] | Height [mAU] | Area %  |
|--------|---------------|------|-------------|--------------|--------------|---------|
| 1      | 20.602        | BV   | 0.0905      | 2707.83374   | 461.14719    | 94.4635 |
| 2      | 20.897        | VB   | 0.0894      | 56.78530     | 9.55181      | 1.9810  |
| 3      | 22.450        | VV   | 0.0781      | 19.28189     | 3.74140      | 0.6727  |
| 4      | 22.611        | VB   | 0.1000      | 82.63763     | 12.36380     | 2.8828  |

Totals : 2866.53856 486.80420

Signal 6: DAD1 F, Sig=320,16 Ref=off

| Peak # | RetTime [min] | Type | Width [min] | Area [mAU*s] | Height [mAU] | Area %  |
|--------|---------------|------|-------------|--------------|--------------|---------|
| 1      | 20.602        | BV   | 0.0906      | 4121.34521   | 700.93152    | 93.5993 |
| 2      | 20.898        | VB   | 0.0881      | 147.19968    | 25.22091     | 3.3430  |
| 3      | 22.612        | VB   | 0.1011      | 71.32451     | 10.26158     | 1.6198  |
| 4      | 22.882        | BV   | 0.0867      | 63.31134     | 11.41986     | 1.4379  |

Totals : 4403.18074 747.83387

Signal 7: DAD1 G, Sig=300,16 Ref=off

| Peak # | RetTime [min] | Type | Width [min] | Area [mAU*s] | Height [mAU] | Area %  |
|--------|---------------|------|-------------|--------------|--------------|---------|
| 1      | 20.602        | BV   | 0.0907      | 5344.69971   | 907.99390    | 94.2988 |
| 2      | 20.898        | VB   | 0.0892      | 133.21346    | 22.46591     | 2.3503  |
| 3      | 22.451        | VV   | 0.0796      | 34.93911     | 6.61825      | 0.6164  |
| 4      | 22.612        | VB   | 0.0994      | 109.13794    | 16.45338     | 1.9256  |
| 5      | 22.882        | BV   | 0.0863      | 45.84373     | 8.31994      | 0.8088  |

Totals : 5667.83394 961.85137

Data File C:\Chem32\1\Data\WEN\wr-iii-57-2.D  
Sample Name: wr-iii-57-2

Signal 8: DAD1 H, Sig=320,16 Ref=off

| Peak # | RetTime [min] | Type | Width [min] | Area [mAU*s] | Height [mAU] | Area %  |
|--------|---------------|------|-------------|--------------|--------------|---------|
| 1      | 20.602        | BV   | 0.0906      | 4121.34521   | 700.93152    | 92.8695 |
| 2      | 20.898        | VB   | 0.0881      | 147.19968    | 25.22091     | 3.3170  |
| 3      | 22.452        | VV   | 0.0826      | 34.60011     | 6.45276      | 0.7797  |
| 4      | 22.612        | VB   | 0.1011      | 71.32451     | 10.26158     | 1.6072  |
| 5      | 22.882        | BV   | 0.0867      | 63.31134     | 11.41986     | 1.4266  |

Totals :                   4437.78086 754.28663

=====  
\*\*\* End of Report \*\*\*

# Compound 5h

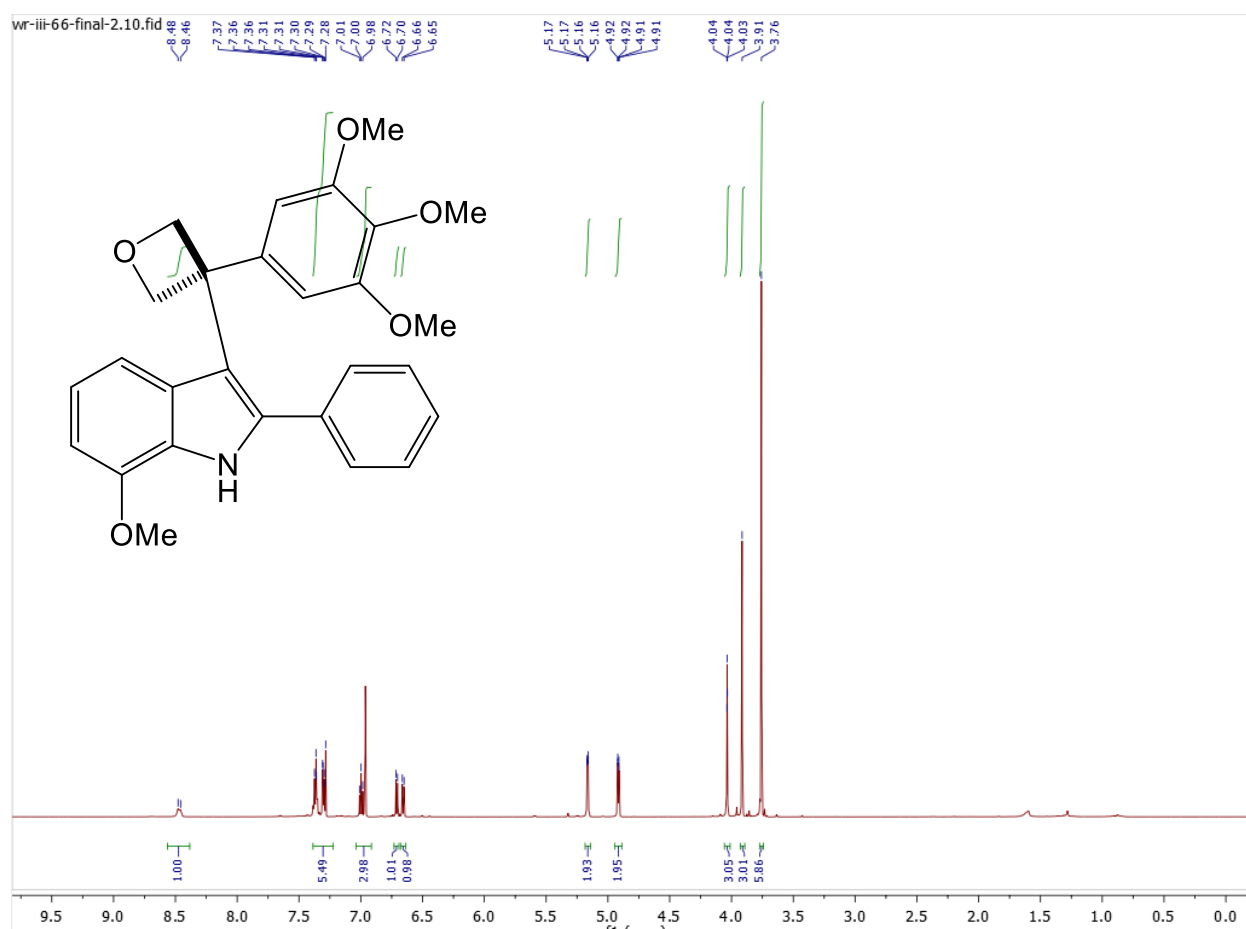

wr-iii-66-final-2.11.fid

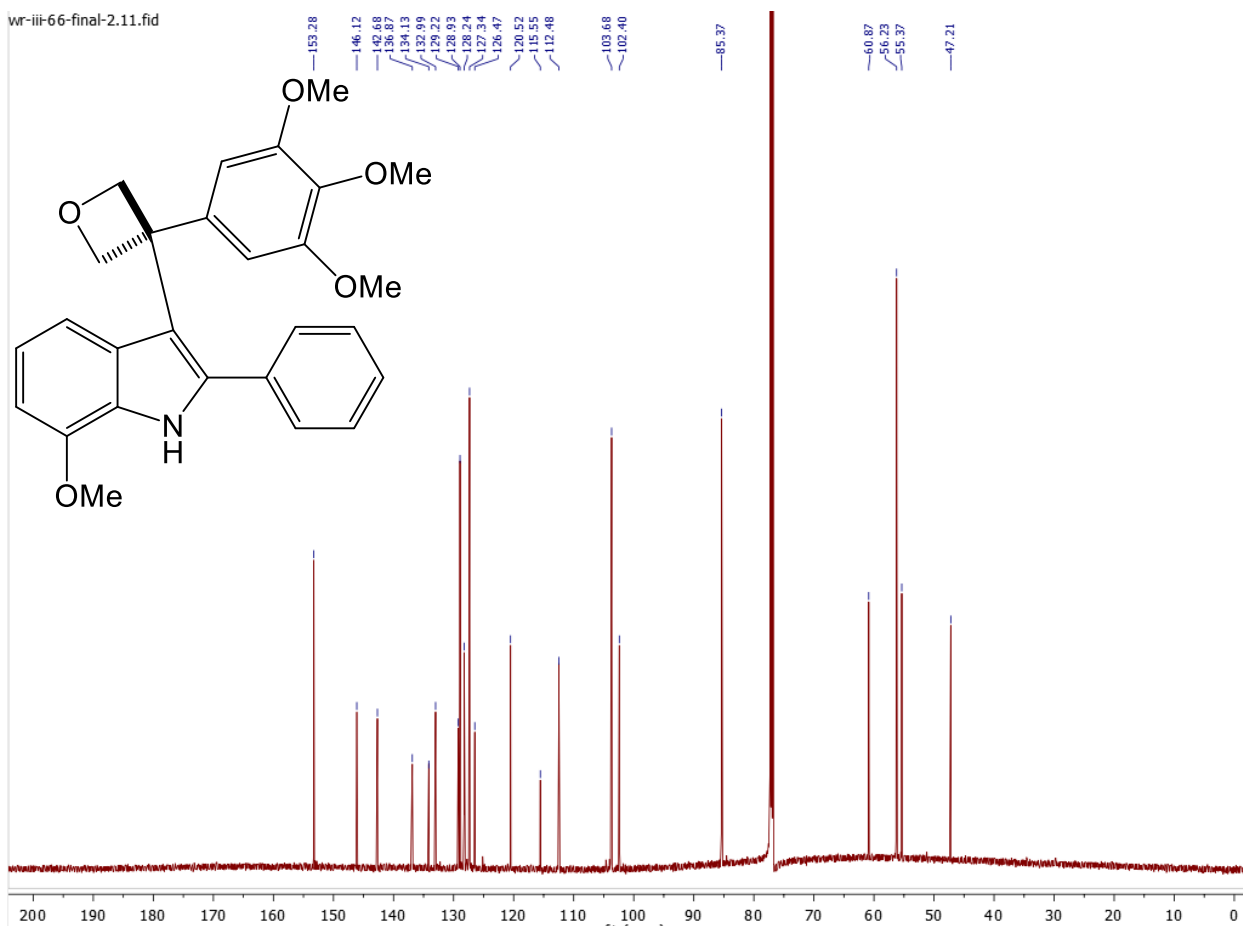

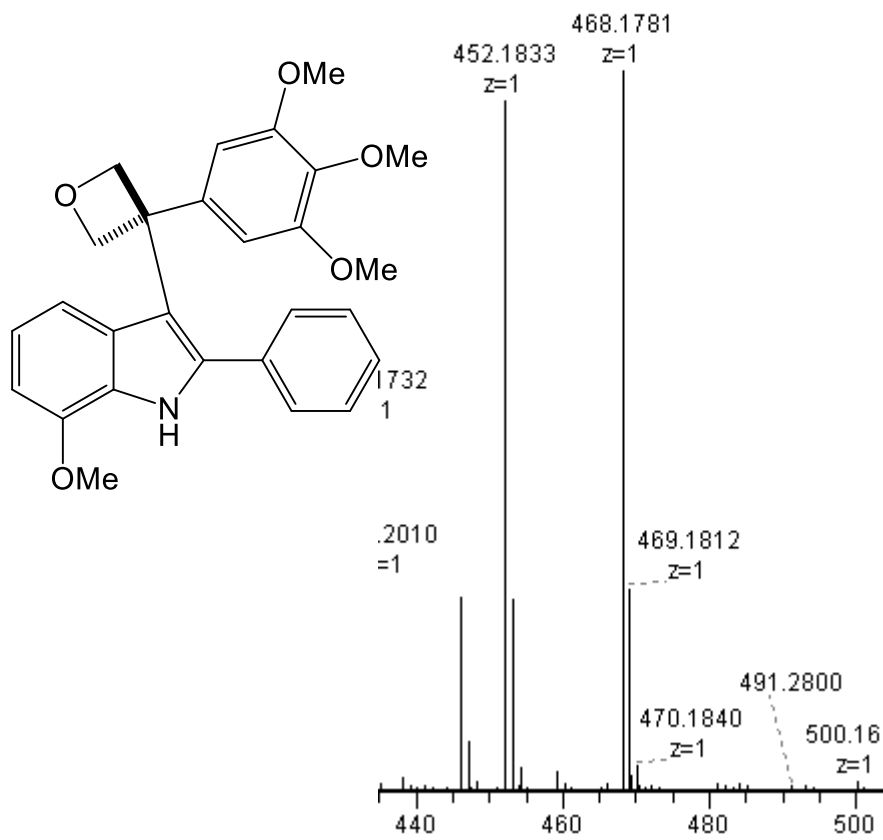

Data File C:\Chem32\1\Data\WEN\wr-iii-66-2.D  
Sample Name: wr-iii-66-2

=====

|                 |                                       |            |          |
|-----------------|---------------------------------------|------------|----------|
| Acq. Operator   | : SYSTEM                              |            |          |
| Sample Operator | : SYSTEM                              |            |          |
| Acq. Instrument | : 1200 HPLC                           | Location   | : 1      |
| Injection Date  | : 3/6/2023 1:03:39 PM                 |            |          |
|                 |                                       | Inj Volume | : No inj |
| Acq. Method     | : C:\Chem32\1\Methods\MASTERMETHOD2.M |            |          |
| Last changed    | : 12/2/2015 12:37:42 PM by Eric Lin   |            |          |
| Analysis Method | : C:\Chem32\1\Methods\RT-ACNWASH 2.M  |            |          |
| Last changed    | : 7/9/2015 2:27:22 PM by Blake        |            |          |
| Method Info     | : General Column Wash Method          |            |          |

Additional Info : Peak(s) manually integrated

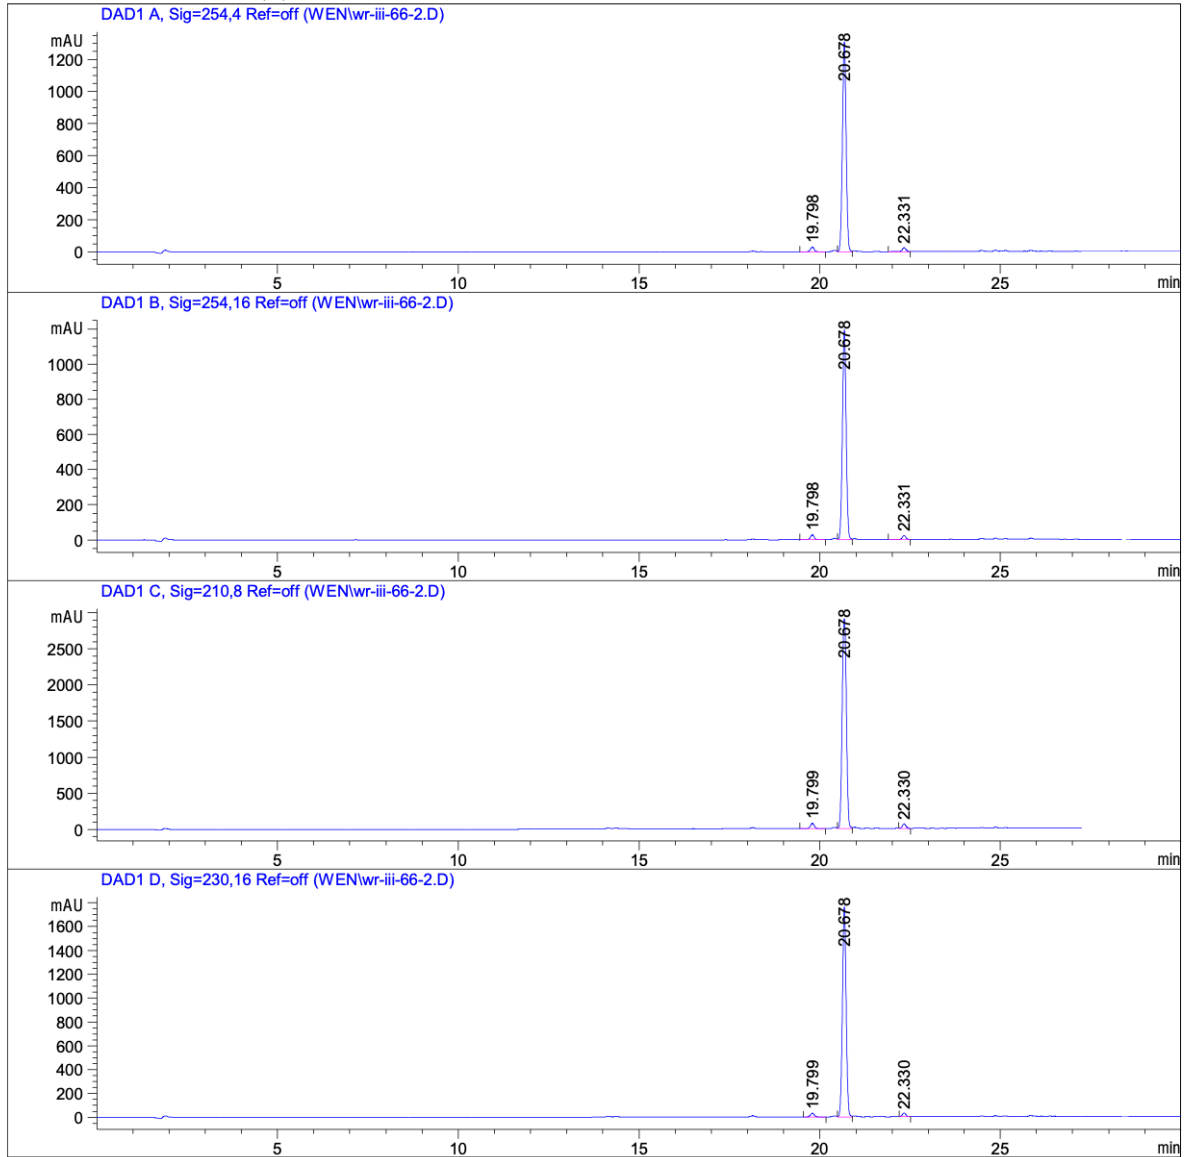



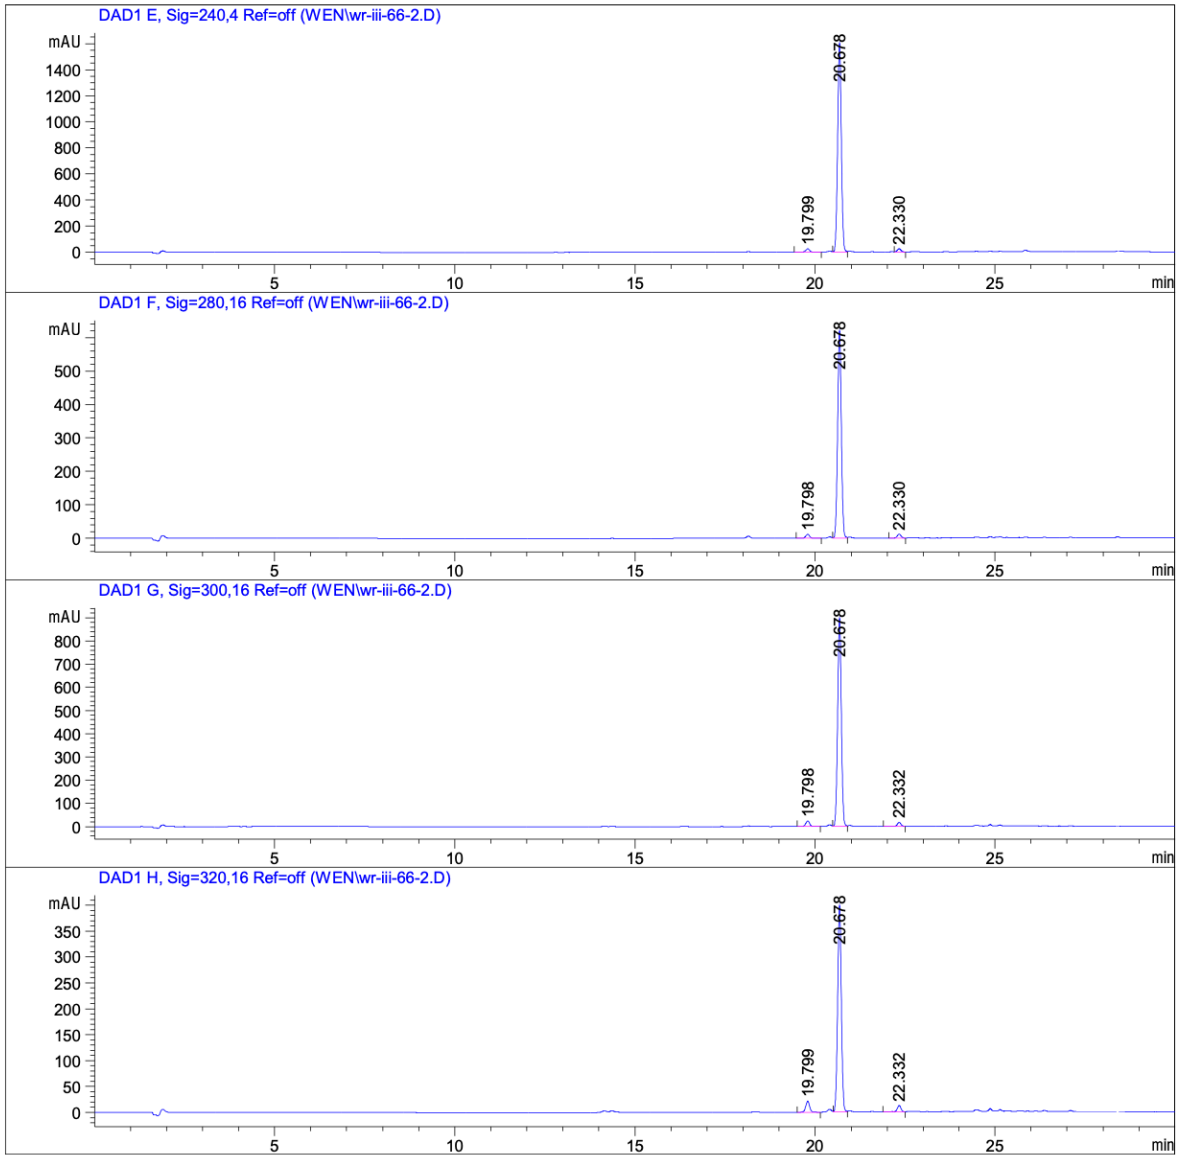

=====  
Area Percent Report  
=====

Sorted By : Signal  
Multiplier : 1.0000  
Dilution : 1.0000  
Sample Amount : 1.00000 [ng/ul] (not used in calc.)  
Use Multiplier & Dilution Factor with ISTDs

Sample Name: wr-iii-66-2

Signal 1: DAD1 A, Sig=254,4 Ref=off

| Peak # | RetTime [min] | Type | Width [min] | Area [mAU*s] | Height [mAU] | Area %  |
|--------|---------------|------|-------------|--------------|--------------|---------|
| 1      | 19.798        | BB   | 0.1097      | 215.90776    | 29.38068     | 2.2578  |
| 2      | 20.678        | VV   | 0.1076      | 9165.81250   | 1309.95911   | 95.8476 |
| 3      | 22.331        | BV   | 0.1104      | 181.17979    | 25.04303     | 1.8946  |

Totals : 9562.90005 1364.38282

Signal 2: DAD1 B, Sig=254,16 Ref=off

| Peak # | RetTime [min] | Type | Width [min] | Area [mAU*s] | Height [mAU] | Area %  |
|--------|---------------|------|-------------|--------------|--------------|---------|
| 1      | 19.798        | BB   | 0.1099      | 207.12729    | 28.14017     | 2.3687  |
| 2      | 20.678        | VV   | 0.1077      | 8361.29102   | 1194.12231   | 95.6214 |
| 3      | 22.331        | BV   | 0.1109      | 175.74190    | 24.14511     | 2.0098  |

Totals : 8744.16020 1246.40760

Signal 3: DAD1 C, Sig=210,8 Ref=off

| Peak # | RetTime [min] | Type | Width [min] | Area [mAU*s] | Height [mAU] | Area %  |
|--------|---------------|------|-------------|--------------|--------------|---------|
| 1      | 19.799        | VB   | 0.1124      | 558.50012    | 73.69063     | 2.3253  |
| 2      | 20.678        | VV   | 0.1266      | 2.30417e4    | 2904.21143   | 95.9336 |
| 3      | 22.330        | VB   | 0.1033      | 418.17468    | 63.08693     | 1.7411  |

Totals : 2.40183e4 3040.98898

Signal 4: DAD1 D, Sig=230,16 Ref=off

| Peak # | RetTime [min] | Type | Width [min] | Area [mAU*s] | Height [mAU] | Area %  |
|--------|---------------|------|-------------|--------------|--------------|---------|
| 1      | 19.799        | BB   | 0.1100      | 227.12460    | 30.81322     | 1.7822  |
| 2      | 20.678        | VV   | 0.1075      | 1.23009e4    | 1760.76233   | 96.5234 |
| 3      | 22.330        | VB   | 0.1050      | 215.92987    | 31.88265     | 1.6944  |

Totals : 1.27440e4 1823.45820

Data File C:\Chem32\1\Data\WEN\wr-iii-66-2.D  
Sample Name: wr-iii-66-2

Signal 5: DAD1 E, Sig=240,4 Ref=off

| Peak # | RetTime [min] | Type | Width [min] | Area [mAU*s] | Height [mAU] | Area %  |
|--------|---------------|------|-------------|--------------|--------------|---------|
| 1      | 19.799        | BB   | 0.1114      | 192.46979    | 25.69604     | 1.6666  |
| 2      | 20.678        | VV   | 0.1073      | 1.11849e4    | 1605.06494   | 96.8526 |
| 3      | 22.330        | VB   | 0.1054      | 171.00220    | 25.12363     | 1.4807  |

Totals : 1.15484e4 1655.88461

Signal 6: DAD1 F, Sig=280,16 Ref=off

| Peak # | RetTime [min] | Type | Width [min] | Area [mAU*s] | Height [mAU] | Area %  |
|--------|---------------|------|-------------|--------------|--------------|---------|
| 1      | 19.798        | BB   | 0.1113      | 89.84528     | 12.00837     | 1.9956  |
| 2      | 20.678        | VV   | 0.1072      | 4326.65234   | 621.65009    | 96.1036 |
| 3      | 22.330        | BV   | 0.1080      | 85.57549     | 12.17355     | 1.9008  |

Totals : 4502.07310 645.83201

Signal 7: DAD1 G, Sig=300,16 Ref=off

| Peak # | RetTime [min] | Type | Width [min] | Area [mAU*s] | Height [mAU] | Area %  |
|--------|---------------|------|-------------|--------------|--------------|---------|
| 1      | 19.798        | BB   | 0.1099      | 181.20651    | 24.60402     | 2.7572  |
| 2      | 20.678        | VV   | 0.1072      | 6264.99658   | 899.87030    | 95.3267 |
| 3      | 22.332        | BV   | 0.1077      | 125.92751    | 17.54367     | 1.9161  |

Totals : 6572.13060 942.01800

Signal 8: DAD1 H, Sig=320,16 Ref=off

| Peak # | RetTime [min] | Type | Width [min] | Area [mAU*s] | Height [mAU] | Area %  |
|--------|---------------|------|-------------|--------------|--------------|---------|
| 1      | 19.799        | BB   | 0.1097      | 157.65778    | 21.45697     | 5.1899  |
| 2      | 20.678        | VV   | 0.1073      | 2786.78467   | 399.75082    | 91.7375 |
| 3      | 22.332        | BV   | 0.1102      | 93.34043     | 12.63743     | 3.0726  |

Totals : 3037.78288 433.84522

=====  
\*\*\* End of Report \*\*\*

# Compound 5i

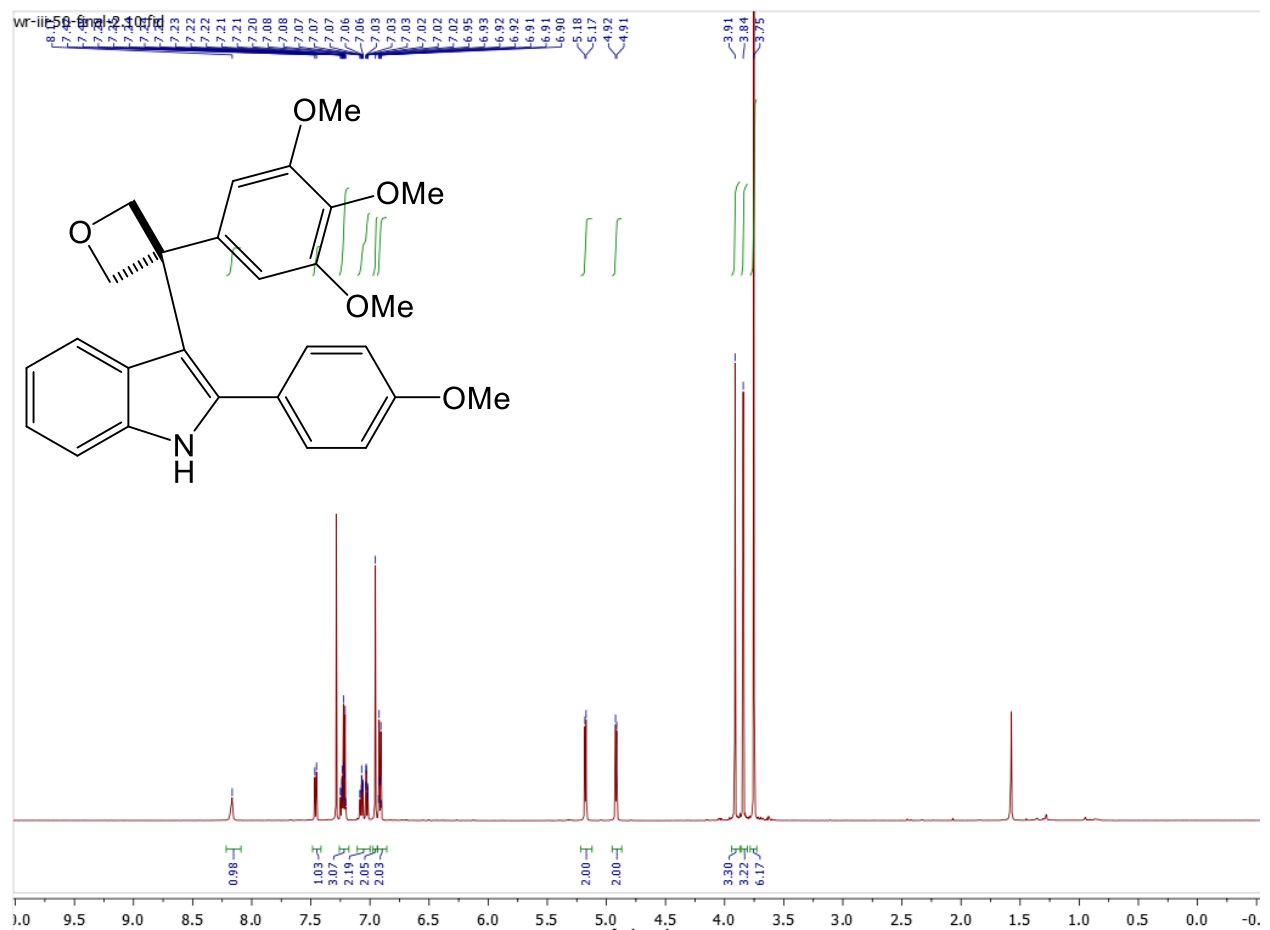

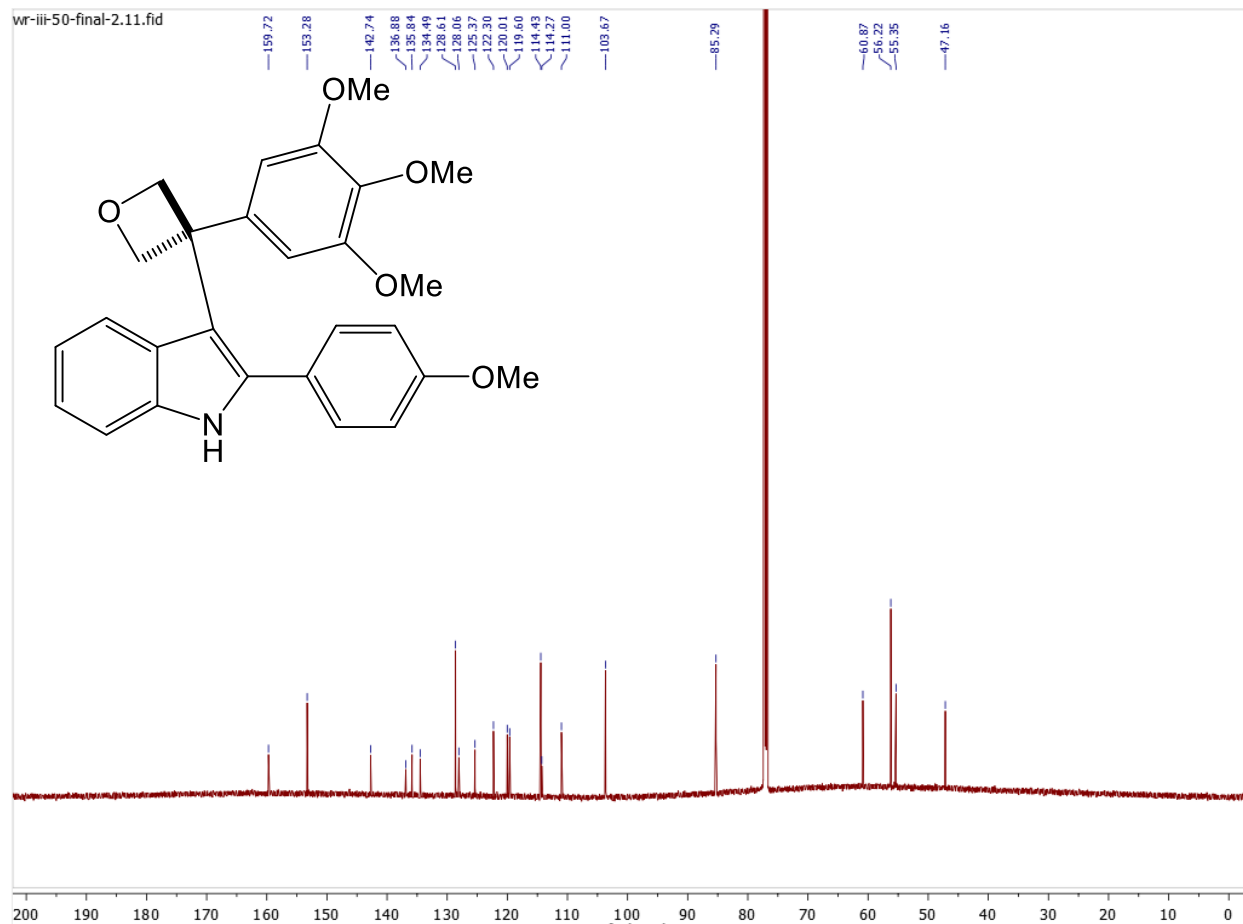

d RF=1240V Stable=4min TmpDiff Lock(1/1, +1ppm)

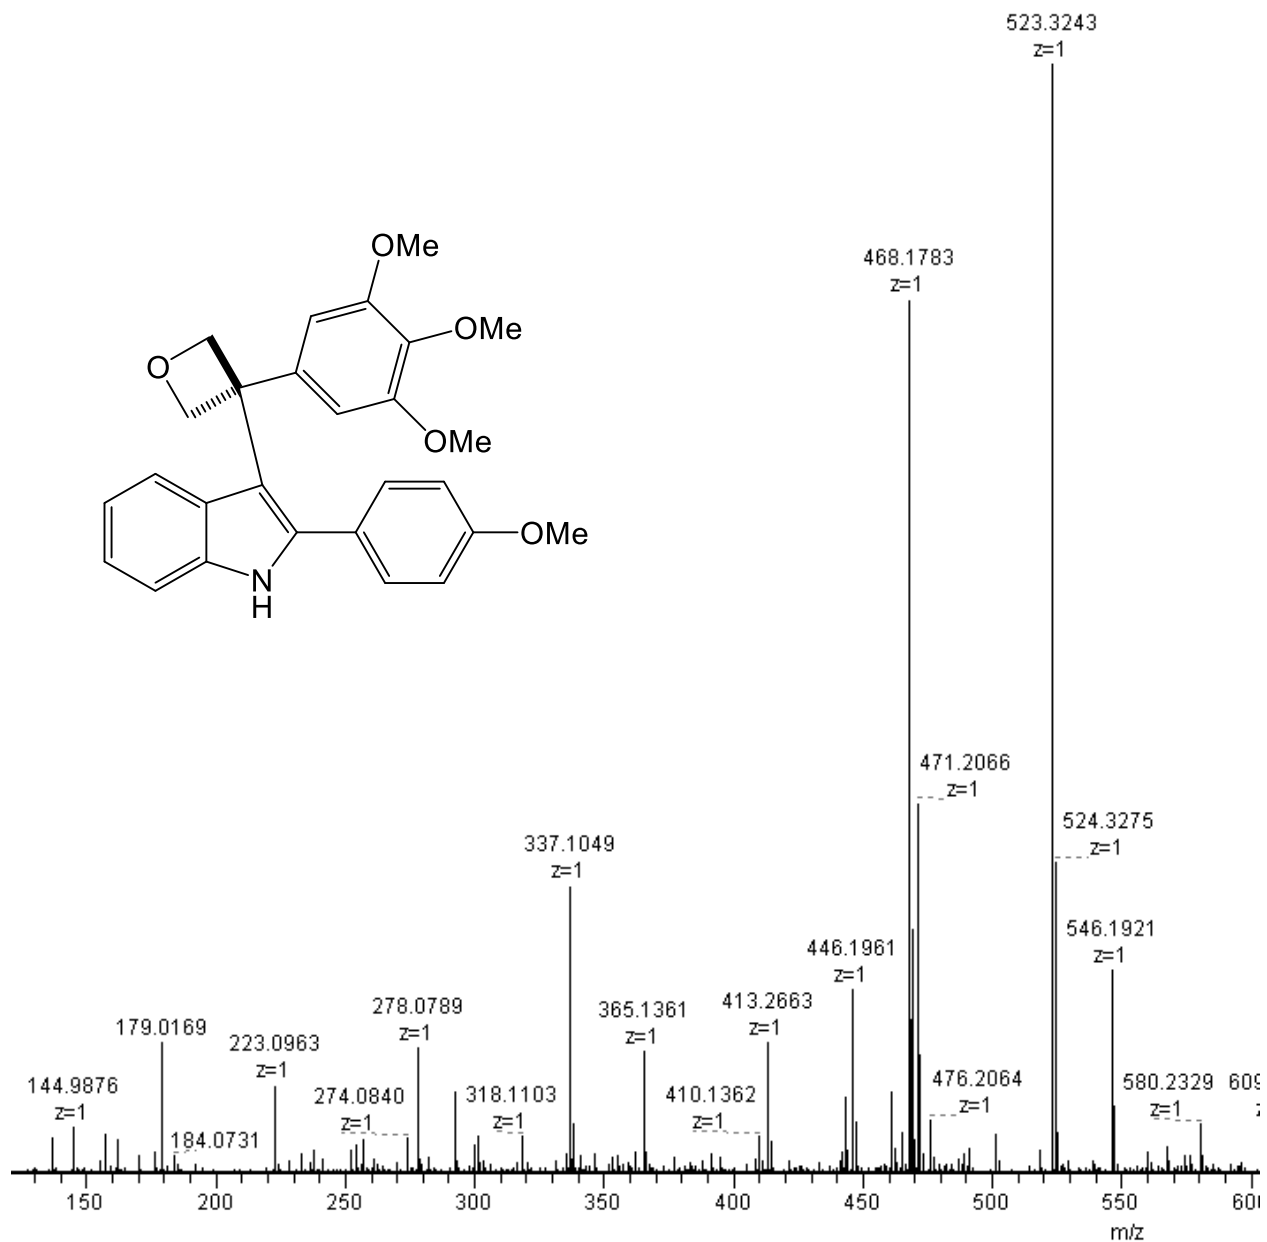



Data File C:\Chem32\1\Data\Ricardo\WR-III-50.D  
 Sample Name: wr-iii-50

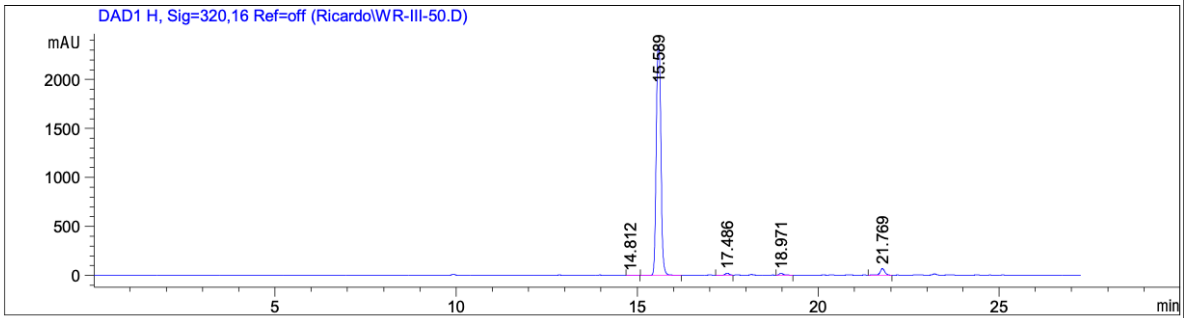

=====  
 Area Percent Report  
 =====

Sorted By : Signal  
 Multiplier : 1.0000  
 Dilution : 1.0000  
 Sample Amount : 1.00000 [ng/ul] (not used in calc.)  
 Use Multiplier & Dilution Factor with ISTDs

Signal 1: DAD1 A, Sig=254,4 Ref=off

| Peak # | RetTime [min] | Type | Width [min] | Area [mAU*s] | Height [mAU] | Area %  |
|--------|---------------|------|-------------|--------------|--------------|---------|
| 1      | 15.588        | BV   | 0.1412      | 2.69445e4    | 3045.55371   | 99.8622 |
| 2      | 16.323        | VV   | 0.1431      | 11.69677     | 1.20699      | 0.0434  |
| 3      | 17.007        | VB   | 0.1287      | 25.48516     | 2.95151      | 0.0945  |

Totals : 2.69816e4 3049.71221

Signal 2: DAD1 C, Sig=210,8 Ref=off

| Peak # | RetTime [min] | Type | Width [min] | Area [mAU*s] | Height [mAU] | Area %  |
|--------|---------------|------|-------------|--------------|--------------|---------|
| 1      | 14.811        | BB   | 0.1826      | 67.21581     | 5.00893      | 0.1499  |
| 2      | 15.576        | BV   | 0.2234      | 4.18274e4    | 3061.66992   | 93.2925 |
| 3      | 17.485        | VV   | 0.1179      | 380.36926    | 49.33554     | 0.8484  |
| 4      | 20.368        | VB   | 0.1208      | 409.29581    | 52.59023     | 0.9129  |
| 5      | 20.855        | BB   | 0.1739      | 650.81262    | 58.47007     | 1.4516  |
| 6      | 21.271        | BV   | 0.1204      | 346.76022    | 44.74298     | 0.7734  |
| 7      | 21.786        | VB   | 0.1685      | 717.54639    | 58.73730     | 1.6004  |
| 8      | 23.208        | BB   | 0.1214      | 435.27579    | 55.55922     | 0.9708  |

Totals : 4.48347e4 3386.11420



Data File C:\Chem32\1\Data\Ricardo\WR-III-50.D  
Sample Name: wr-iii-50

Signal 3: DAD1 E, Sig=280,16 Ref=off

| Peak # | RetTime [min] | Type | Width [min] | Area [mAU*s] | Height [mAU] | Area %  |
|--------|---------------|------|-------------|--------------|--------------|---------|
| 1      | 15.589        | BB   | 0.1245      | 1.96185e4    | 2474.63892   | 98.7383 |
| 2      | 21.771        | VV   | 0.1518      | 250.69673    | 24.02147     | 1.2617  |

Totals : 1.98692e4 2498.66038

Signal 4: DAD1 G, Sig=300,16 Ref=off

| Peak # | RetTime [min] | Type | Width [min] | Area [mAU*s] | Height [mAU] | Area %  |
|--------|---------------|------|-------------|--------------|--------------|---------|
| 1      | 15.588        | BV   | 0.1553      | 2.77497e4    | 2857.06152   | 97.6041 |
| 2      | 18.971        | VV   | 0.1275      | 185.84741    | 21.35965     | 0.6537  |
| 3      | 21.770        | VV   | 0.1474      | 495.32086    | 49.22616     | 1.7422  |

Totals : 2.84309e4 2927.64733

Signal 5: DAD1 H, Sig=320,16 Ref=off

| Peak # | RetTime [min] | Type | Width [min] | Area [mAU*s] | Height [mAU] | Area %  |
|--------|---------------|------|-------------|--------------|--------------|---------|
| 1      | 14.812        | VB   | 0.1156      | 17.77576     | 2.31534      | 0.0811  |
| 2      | 15.589        | BB   | 0.1417      | 2.09100e4    | 2351.58032   | 95.4370 |
| 3      | 17.486        | BV   | 0.1195      | 172.93491    | 22.04464     | 0.7893  |
| 4      | 18.971        | VV   | 0.1267      | 182.44273    | 21.14190     | 0.8327  |
| 5      | 21.769        | VV   | 0.1363      | 626.57568    | 68.79659     | 2.8598  |

Totals : 2.19097e4 2465.87879

=====  
\*\*\* End of Report \*\*\*

# Compound 5j

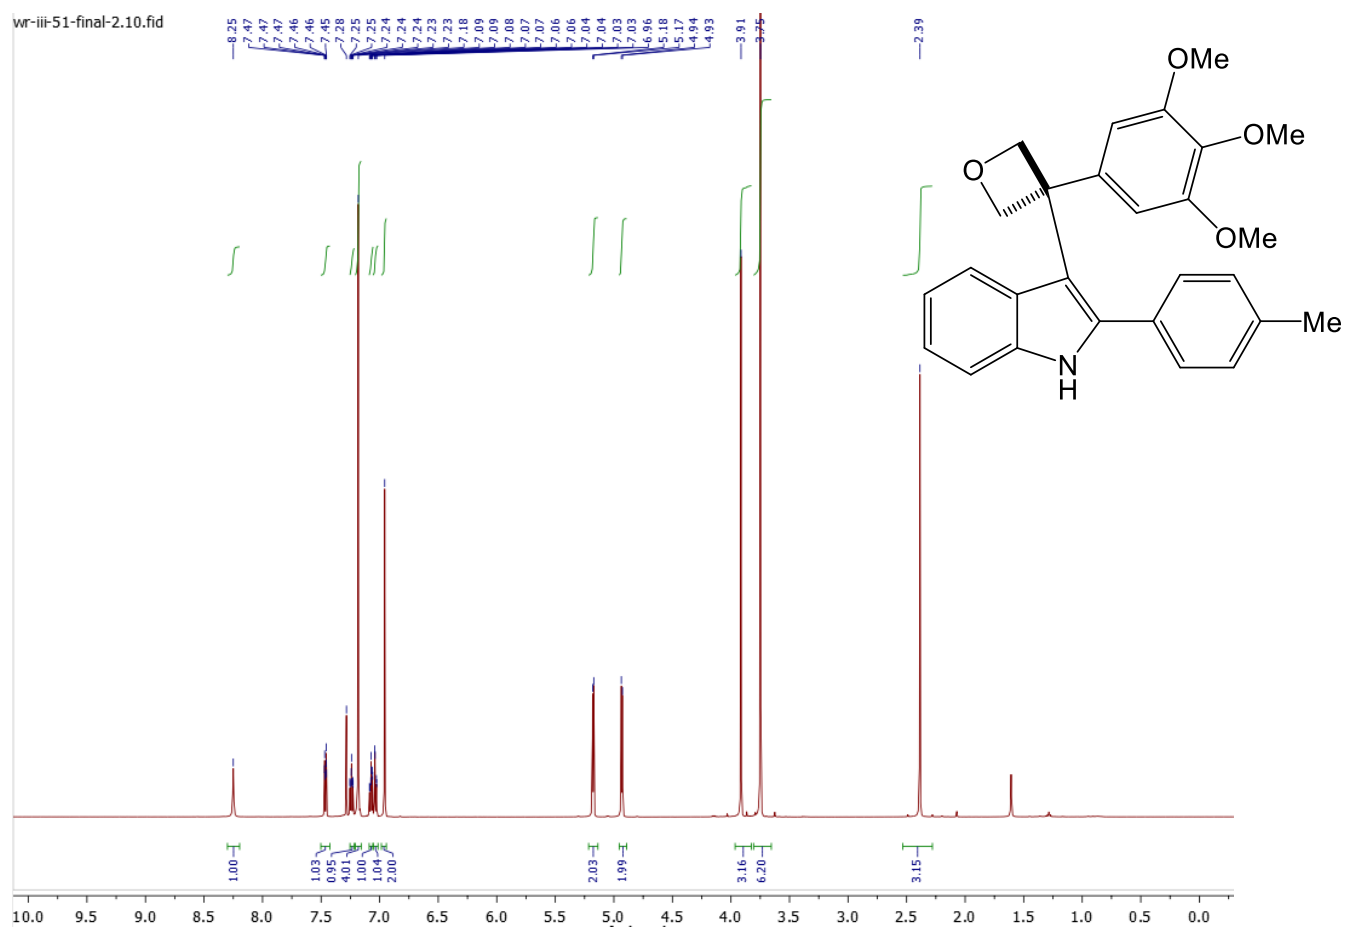

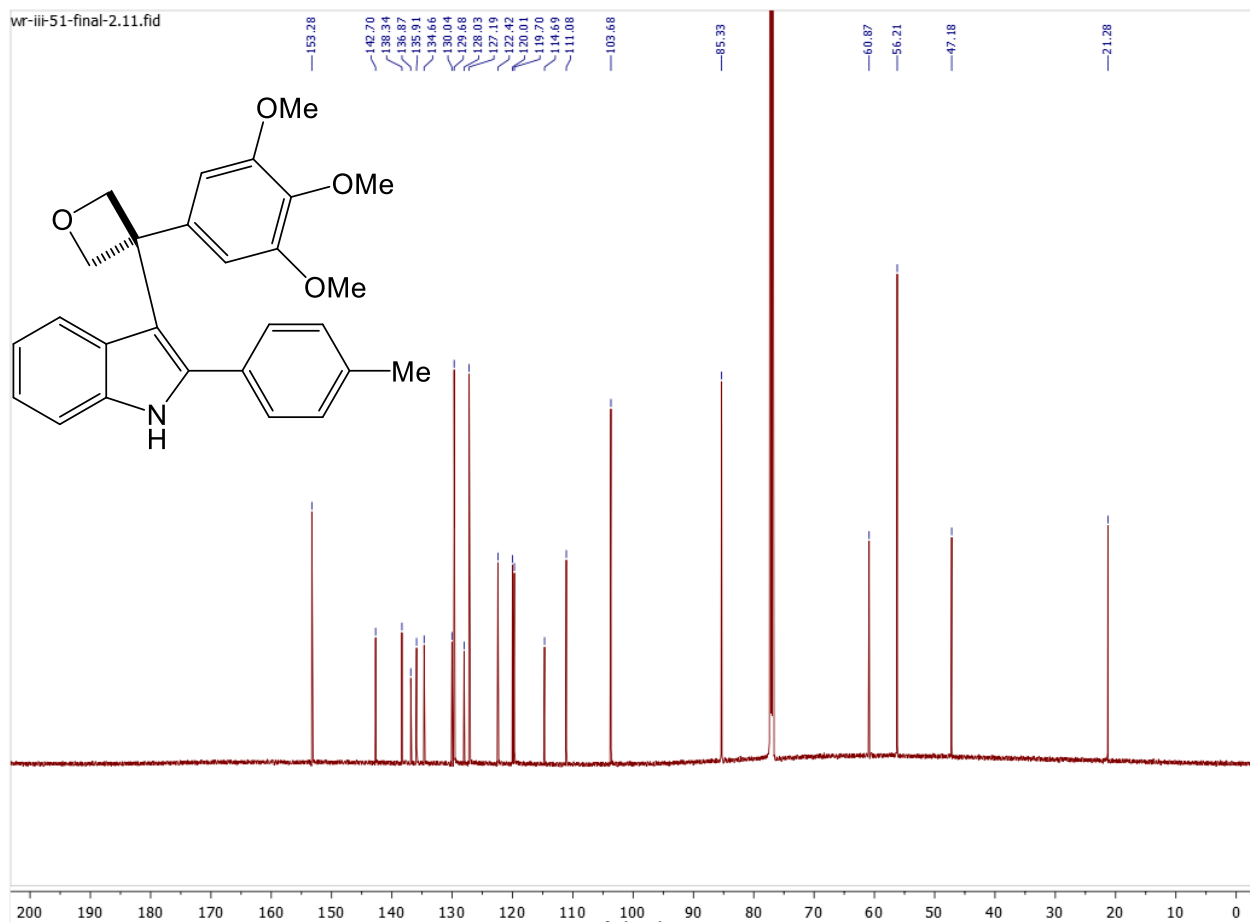

10.00]  
min TmpDiff Lock(inj391.3, 1/1, 0ppm)

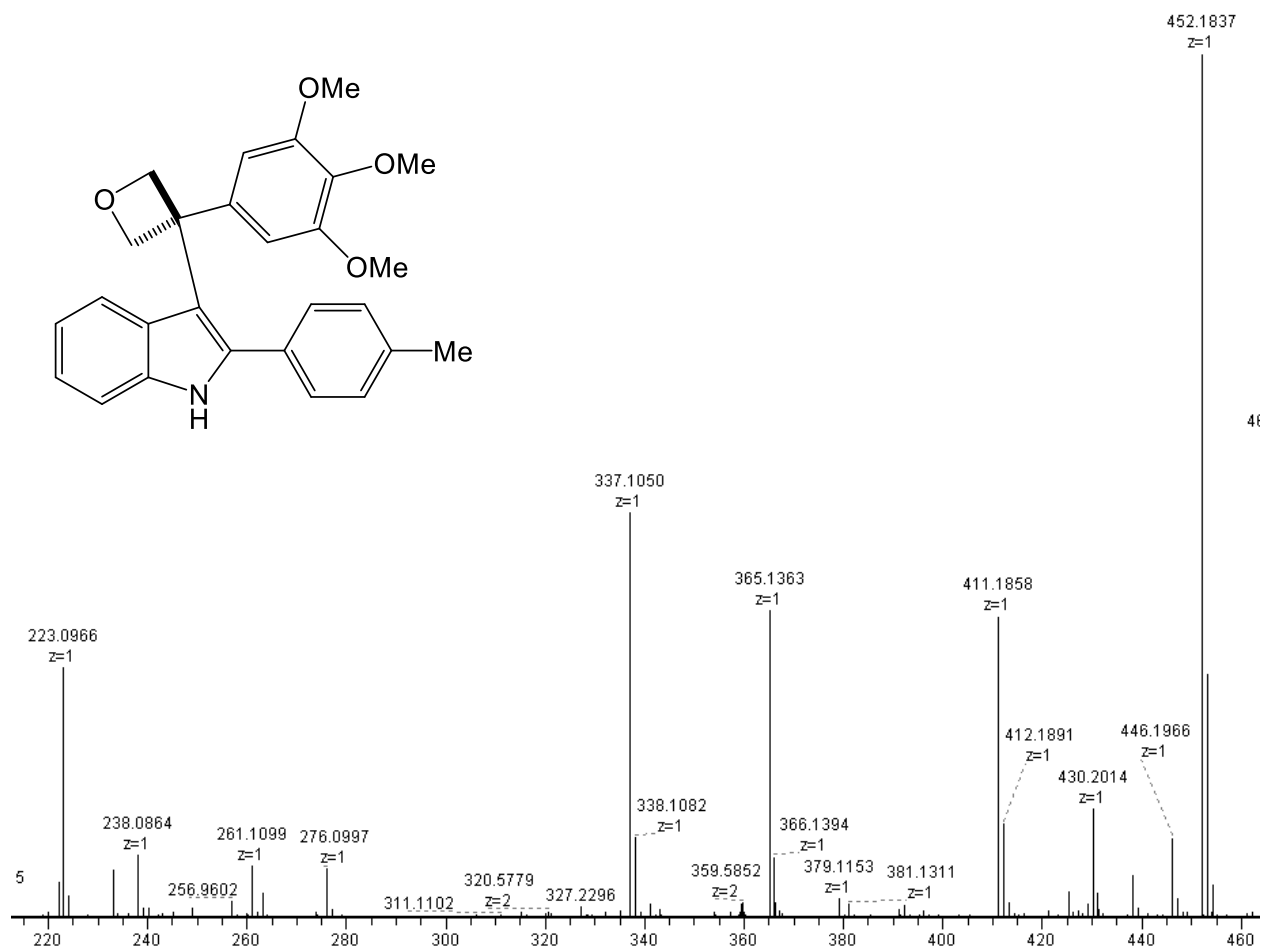

Data File C:\Chem32\1\Data\Ricardo\WR-III-51.D  
Sample Name: wr-iii-51

=====

|                 |                                          |            |          |
|-----------------|------------------------------------------|------------|----------|
| Acq. Operator   | : SYSTEM                                 |            |          |
| Sample Operator | : SYSTEM                                 |            |          |
| Acq. Instrument | : 1200 HPLC                              | Location   | : 1      |
| Injection Date  | : 3/30/2021 2:41:01 PM                   | Inj Volume | : No inj |
| Acq. Method     | : C:\Chem32\1\Methods\GRAD 2 30-90 ACN.M |            |          |
| Last changed    | : 4/2/2014 4:04:33 PM by ERICA P         |            |          |
| Analysis Method | : C:\Chem32\1\Methods\RT-ACNWASH 2.M     |            |          |
| Last changed    | : 7/9/2015 2:27:22 PM by Blake           |            |          |
| Method Info     | : General Column Wash Method             |            |          |

Sample Info : 30-90 ACN wr-iii-51

Additional Info : Peak(s) manually integrated

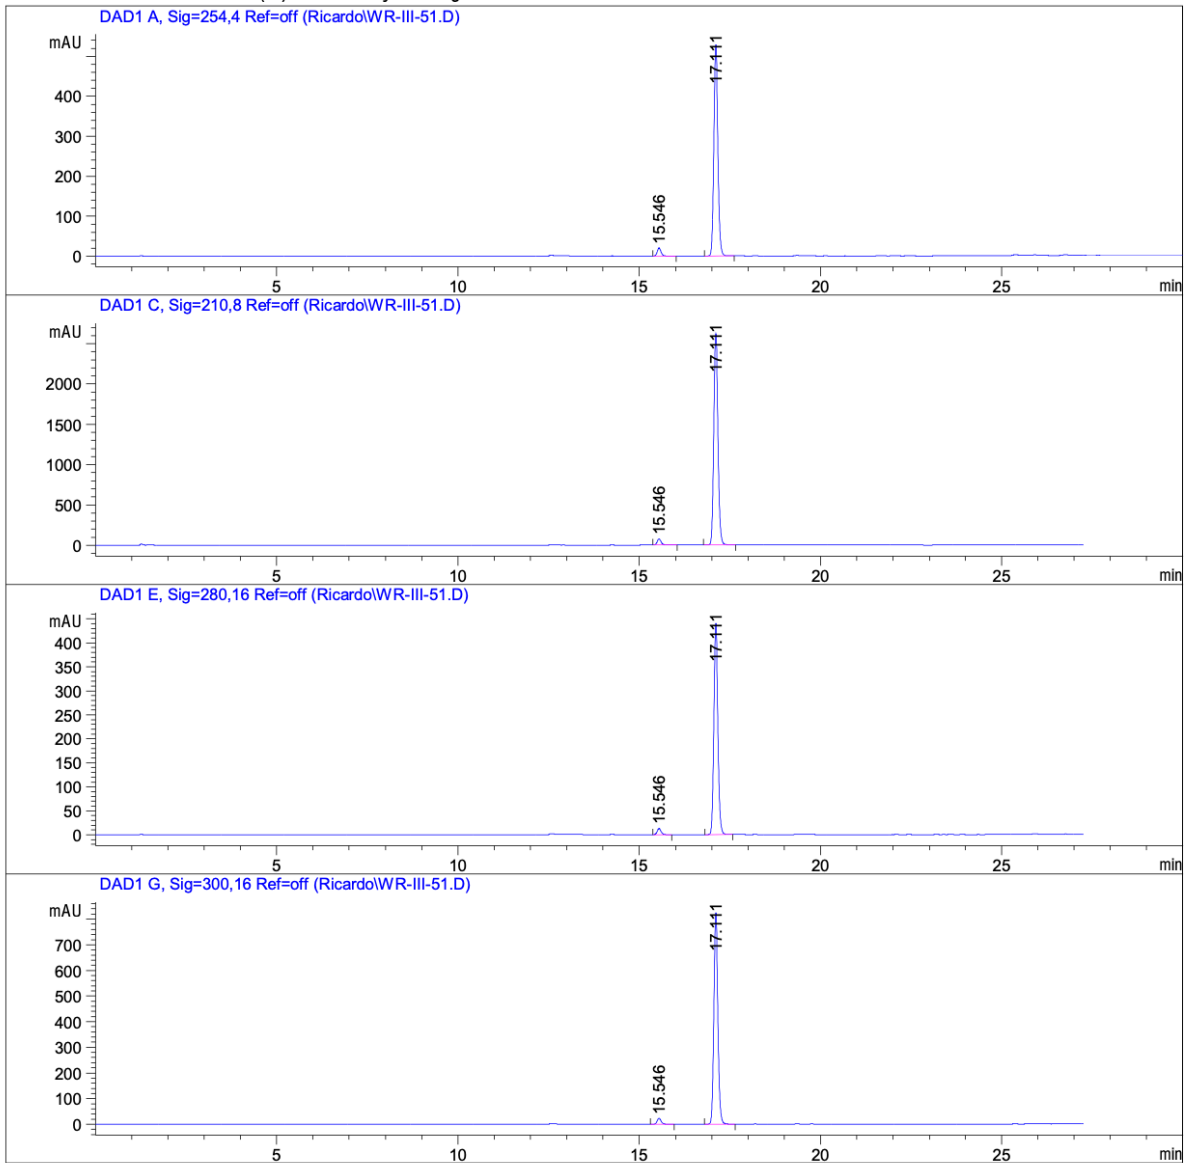

Data File C:\Chem32\1\Data\Ricardo\WR-III-51.D  
 Sample Name: wr-iii-51

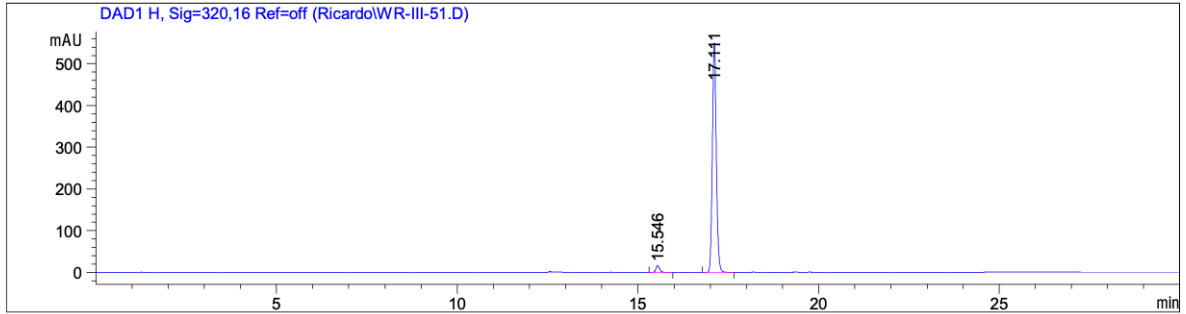

=====  
 Area Percent Report  
 =====

Sorted By : Signal  
 Multiplier : 1.0000  
 Dilution : 1.0000  
 Sample Amount : 1.00000 [ng/ul] (not used in calc.)  
 Use Multiplier & Dilution Factor with ISTDs

Signal 1: DAD1 A, Sig=254,4 Ref=off

| Peak # | RetTime [min] | Type | Width [min] | Area [mAU*s] | Height [mAU] | Area %  |
|--------|---------------|------|-------------|--------------|--------------|---------|
| 1      | 15.546        | BB   | 0.1158      | 155.17206    | 20.62951     | 3.6327  |
| 2      | 17.111        | BB   | 0.1187      | 4116.32666   | 529.73645    | 96.3673 |

Totals : 4271.49872 550.36596

Signal 2: DAD1 C, Sig=210,8 Ref=off

| Peak # | RetTime [min] | Type | Width [min] | Area [mAU*s] | Height [mAU] | Area %  |
|--------|---------------|------|-------------|--------------|--------------|---------|
| 1      | 15.546        | VV   | 0.1186      | 608.21960    | 78.34319     | 2.7868  |
| 2      | 17.111        | BB   | 0.1264      | 2.12170e4    | 2622.46924   | 97.2132 |

Totals : 2.18252e4 2700.81242

Signal 3: DAD1 E, Sig=280,16 Ref=off

| Peak # | RetTime [min] | Type | Width [min] | Area [mAU*s] | Height [mAU] | Area %  |
|--------|---------------|------|-------------|--------------|--------------|---------|
| 1      | 15.546        | BB   | 0.1156      | 99.22981     | 13.22059     | 2.8255  |
| 2      | 17.111        | BB   | 0.1182      | 3412.71826   | 441.37155    | 97.1745 |

Totals : 3511.94807 454.59215

Data File C:\Chem32\1\Data\Ricardo\WR-III-51.D  
Sample Name: wr-iii-51

Signal 4: DAD1 G, Sig=300,16 Ref=off

| Peak # | RetTime [min] | Type | Width [min] | Area [mAU*s] | Height [mAU] | Area %  |
|--------|---------------|------|-------------|--------------|--------------|---------|
| 1      | 15.546        | BB   | 0.1160      | 178.06367    | 23.61539     | 2.7060  |
| 2      | 17.111        | BB   | 0.1184      | 6402.19385   | 826.61566    | 97.2940 |

Totals :                   6580.25752  850.23105

Signal 5: DAD1 H, Sig=320,16 Ref=off

| Peak # | RetTime [min] | Type | Width [min] | Area [mAU*s] | Height [mAU] | Area %  |
|--------|---------------|------|-------------|--------------|--------------|---------|
| 1      | 15.546        | BB   | 0.1165      | 122.06917    | 16.09184     | 2.7765  |
| 2      | 17.111        | BB   | 0.1184      | 4274.45313   | 551.40344    | 97.2235 |

Totals :                   4396.52229  567.49529

=====  
\*\*\* End of Report \*\*\*

# Compound 5k

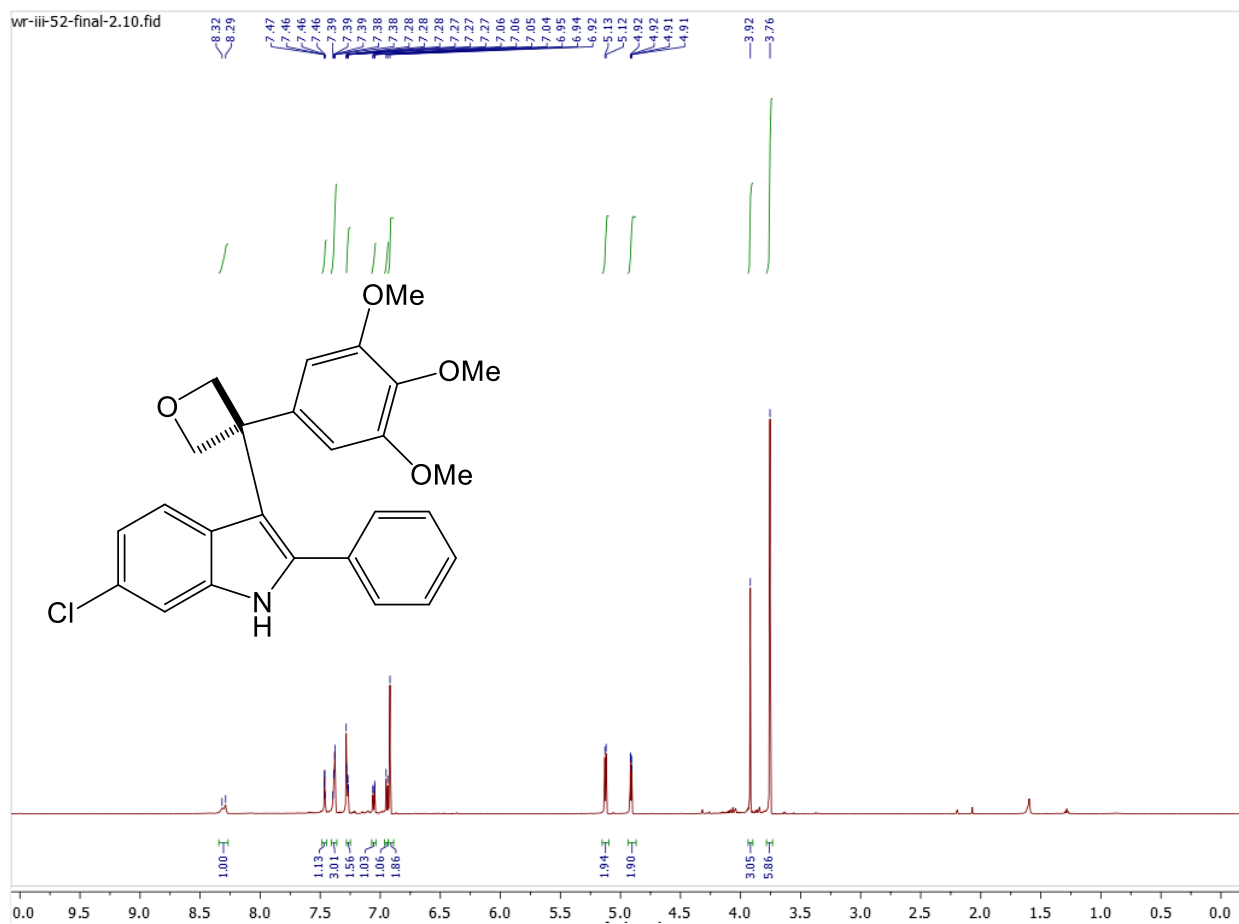



wr-iii-52-final-2.11.fid

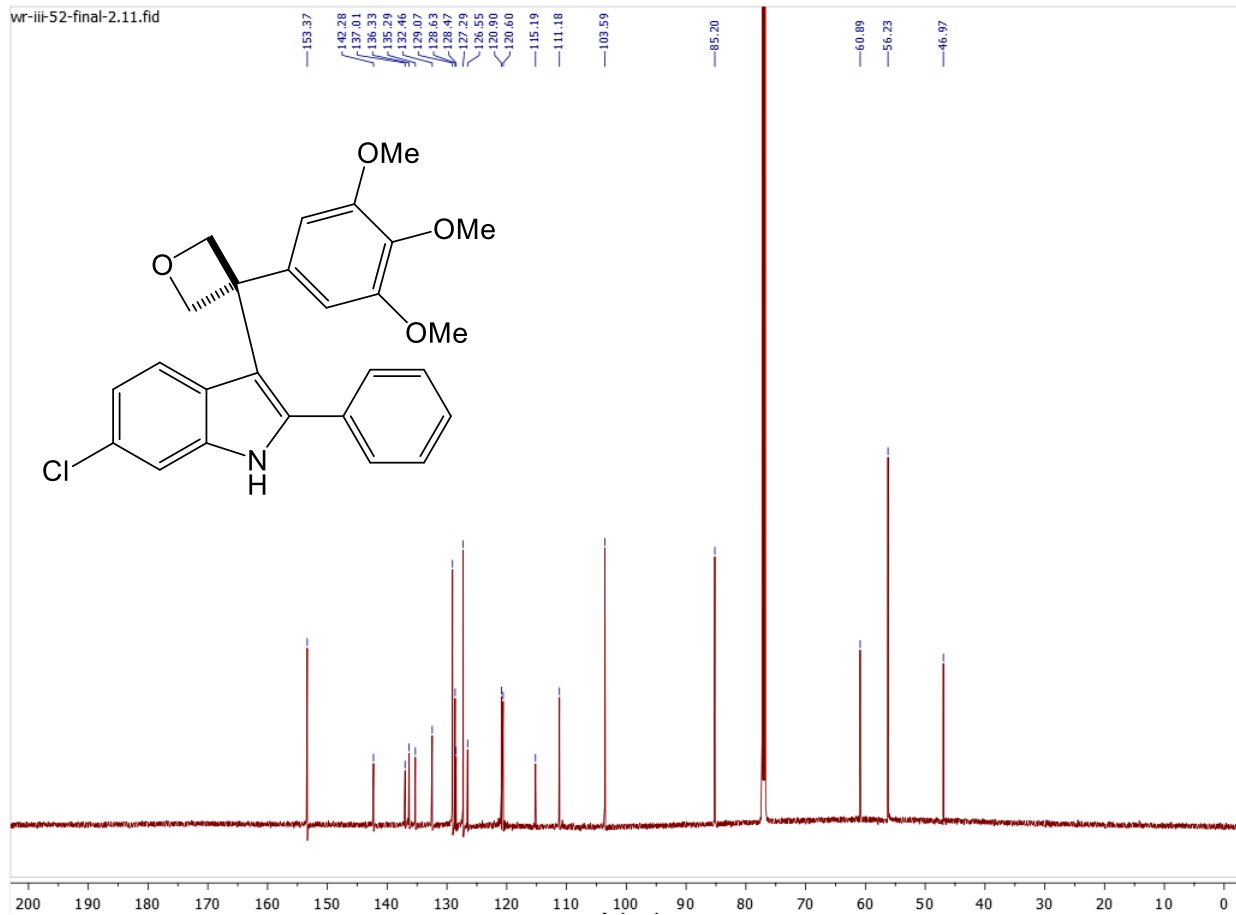

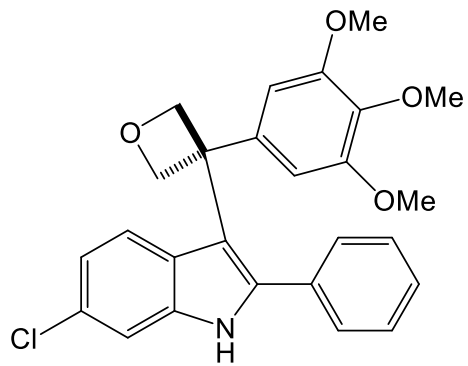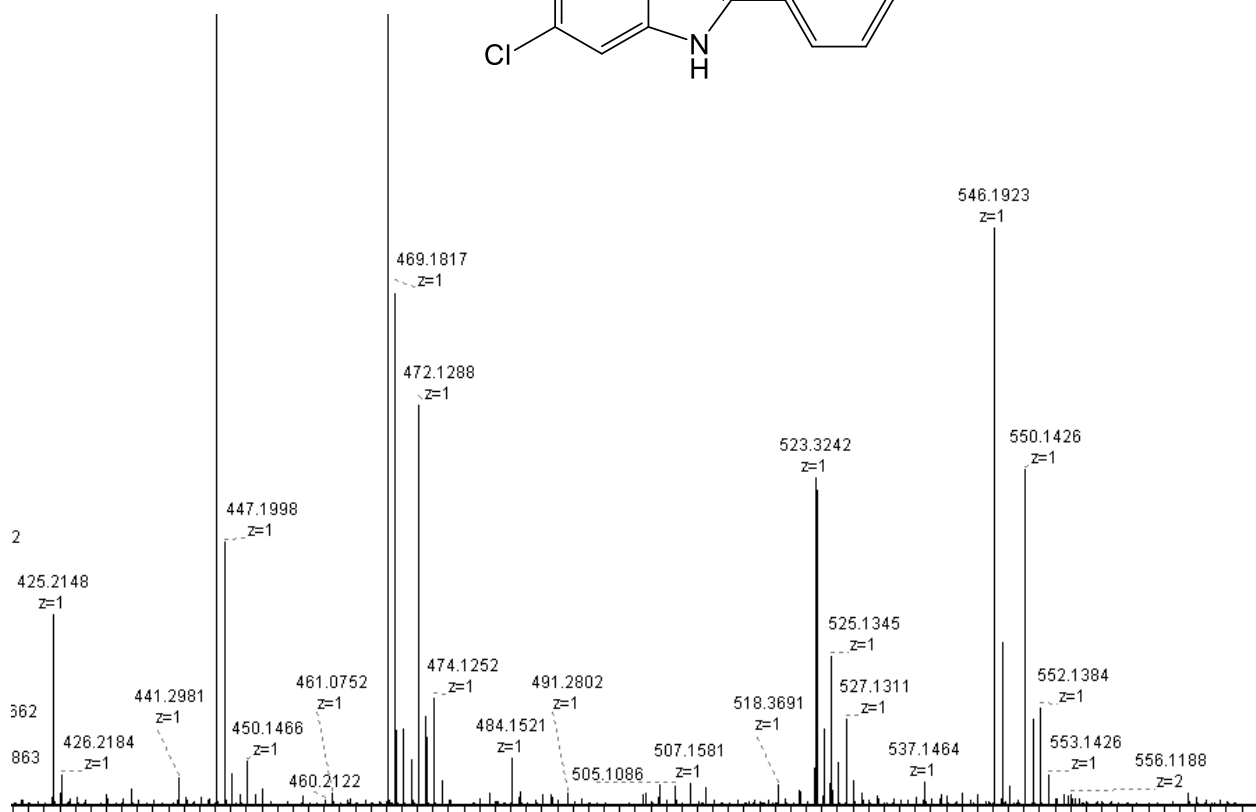



Data File C:\Chem32\1\Data\Ricardo\wr-iii-52-3.D  
 Sample Name: wr-iii-52-3

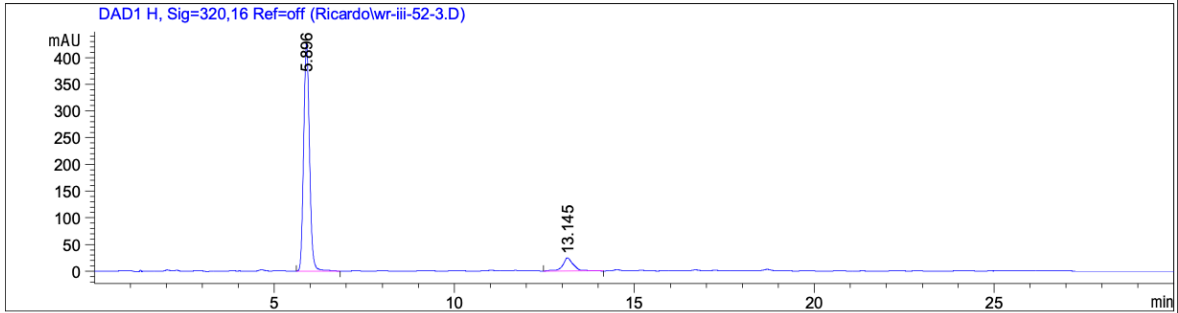

=====  
 Area Percent Report  
 =====

Sorted By : Signal  
 Multiplier : 1.0000  
 Dilution : 1.0000  
 Sample Amount: : 1.00000 [ng/ul] (not used in calc.)  
 Use Multiplier & Dilution Factor with ISTDs

Signal 1: DAD1 A, Sig=254,4 Ref=off

| Peak # | RetTime [min] | Type | Width [min] | Area [mAU*s] | Height [mAU] | Area %  |
|--------|---------------|------|-------------|--------------|--------------|---------|
| 1      | 5.896         | BB   | 0.1798      | 4894.52197   | 426.67896    | 86.7160 |
| 2      | 13.149        | VB   | 0.2784      | 749.79047    | 37.97300     | 13.2840 |

Totals : 5644.31244 464.65196

Signal 2: DAD1 C, Sig=210,8 Ref=off

| Peak # | RetTime [min] | Type | Width [min] | Area [mAU*s] | Height [mAU] | Area %  |
|--------|---------------|------|-------------|--------------|--------------|---------|
| 1      | 5.895         | BV   | 0.1802      | 2.01088e4    | 1748.11218   | 92.7887 |
| 2      | 12.718        | BV   | 0.2128      | 367.41565    | 26.00728     | 1.6954  |
| 3      | 13.142        | VV   | 0.2755      | 1066.93445   | 54.71981     | 4.9232  |
| 4      | 13.676        | VB   | 0.2697      | 128.44844    | 6.35697      | 0.5927  |

Totals : 2.16716e4 1835.19624

Signal 3: DAD1 E, Sig=280,16 Ref=off

| Peak # | RetTime [min] | Type | Width [min] | Area [mAU*s] | Height [mAU] | Area %  |
|--------|---------------|------|-------------|--------------|--------------|---------|
| 1      | 5.896         | BB   | 0.1802      | 2419.03955   | 210.26505    | 83.0804 |
| 2      | 13.291        | VB   | 0.3154      | 492.64685    | 21.17661     | 16.9196 |

Data File C:\Chem32\1\Data\Ricardo\wr-iii-52-3.D

Sample Name: wr-iii-52-3

| Peak #   | RetTime [min] | Type | Width [min] | Area [mAU*s] | Height [mAU] | Area % |
|----------|---------------|------|-------------|--------------|--------------|--------|
| Totals : |               |      |             | 2911.68640   | 231.44165    |        |

Signal 4: DAD1 G, Sig=300,16 Ref=off

| Peak #   | RetTime [min] | Type | Width [min] | Area [mAU*s] | Height [mAU] | Area %  |
|----------|---------------|------|-------------|--------------|--------------|---------|
| 1        | 5.896         | BB   | 0.1786      | 4907.32666   | 431.75131    | 89.8675 |
| 2        | 6.971         | BB   | 0.1929      | 16.49167     | 1.40543      | 0.3020  |
| 3        | 12.728        | BV   | 0.1817      | 28.02455     | 2.37365      | 0.5132  |
| 4        | 13.163        | VB   | 0.3067      | 508.77982    | 22.76542     | 9.3172  |
| Totals : |               |      |             | 5460.62270   | 458.29581    |         |

Signal 5: DAD1 H, Sig=320,16 Ref=off

| Peak #   | RetTime [min] | Type | Width [min] | Area [mAU*s] | Height [mAU] | Area %  |
|----------|---------------|------|-------------|--------------|--------------|---------|
| 1        | 5.896         | BB   | 0.1785      | 4850.44922   | 427.23105    | 90.5085 |
| 2        | 13.145        | BB   | 0.2884      | 508.65955    | 24.89326     | 9.4915  |
| Totals : |               |      |             | 5359.10876   | 452.12431    |         |

=====  
\*\*\* End of Report \*\*\*

# Compound 51

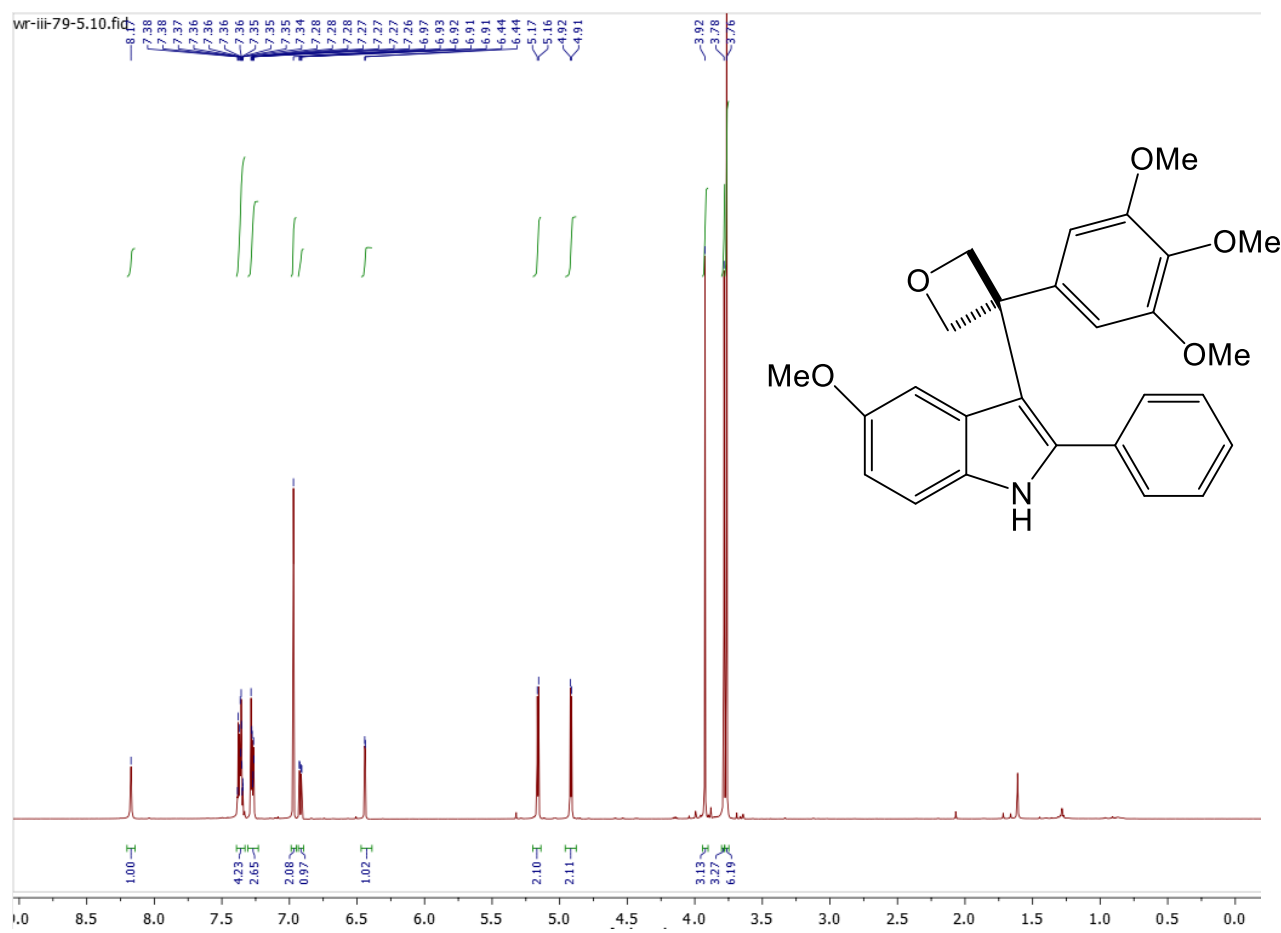

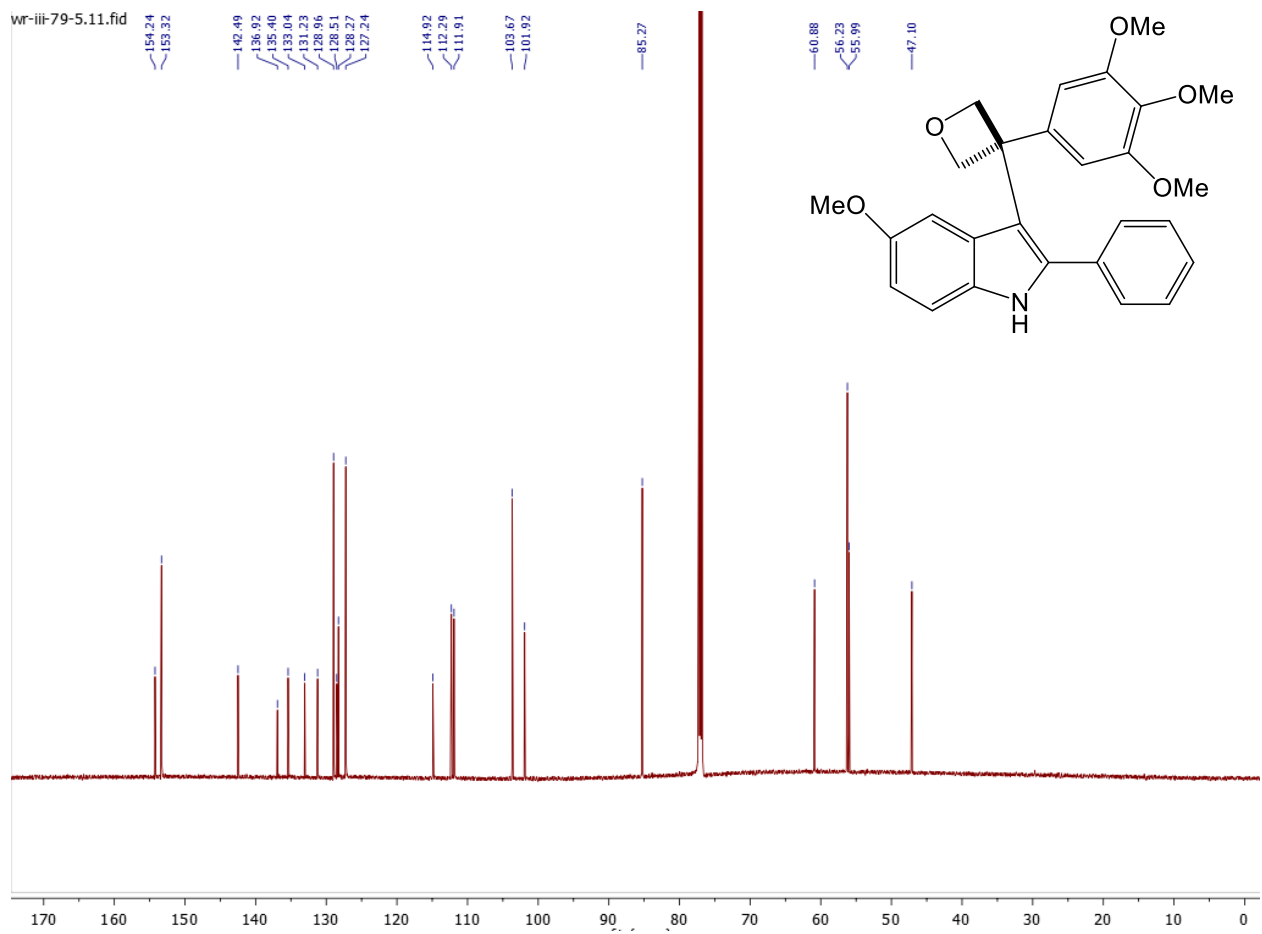

IT: 9.976 ST: 0.65 uS: 1 CS: 1 AMW: 467.17 NL: 4.08E7  
+ p ESI Full ms [200.00-600.00]  
il=3d RF=2300V TmpDiff Lock(1/1, +7ppm)

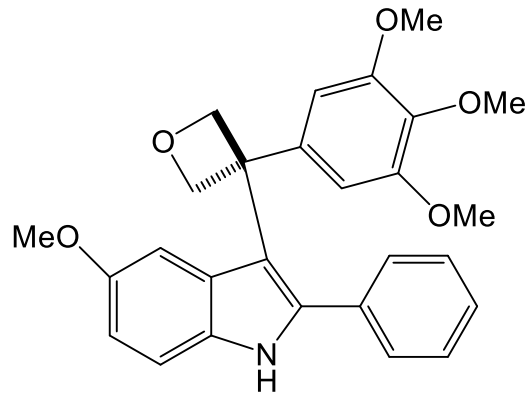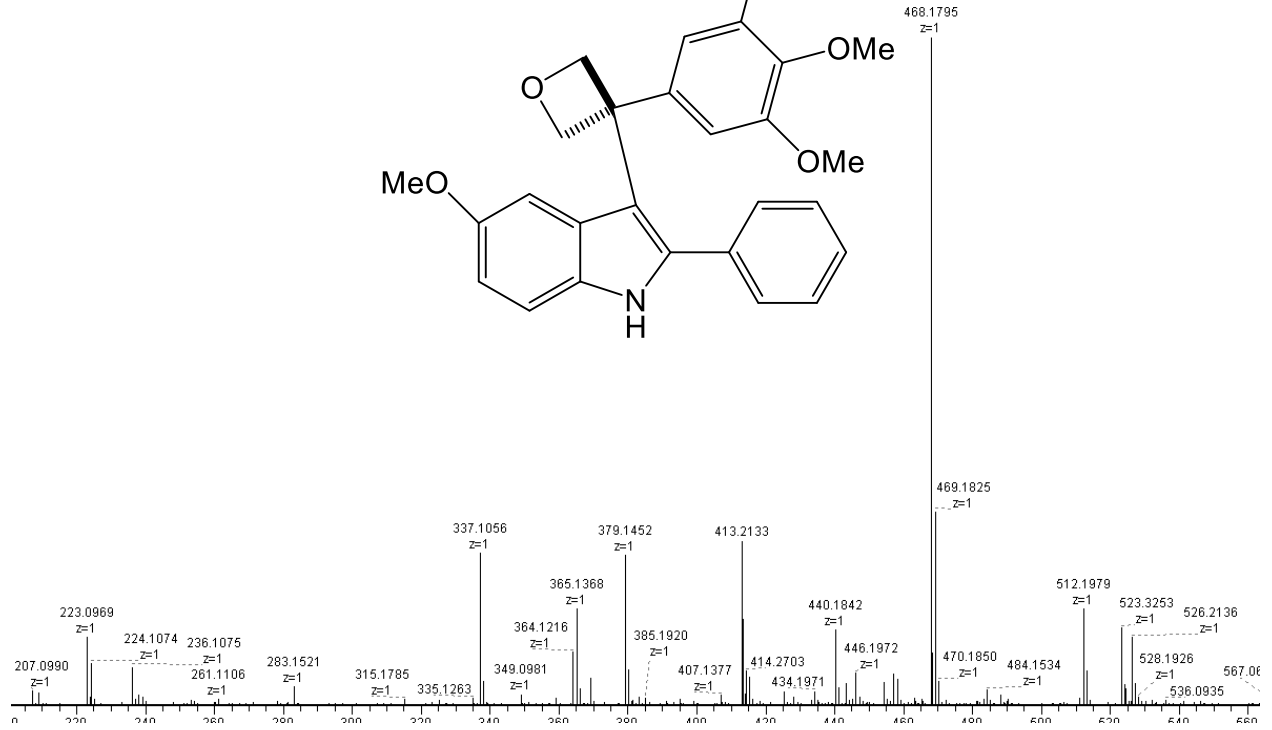





Data File C:\Chem32\1\Data\WEN\wr-iii-79-3.D  
Sample Name: wr-iii-79-3

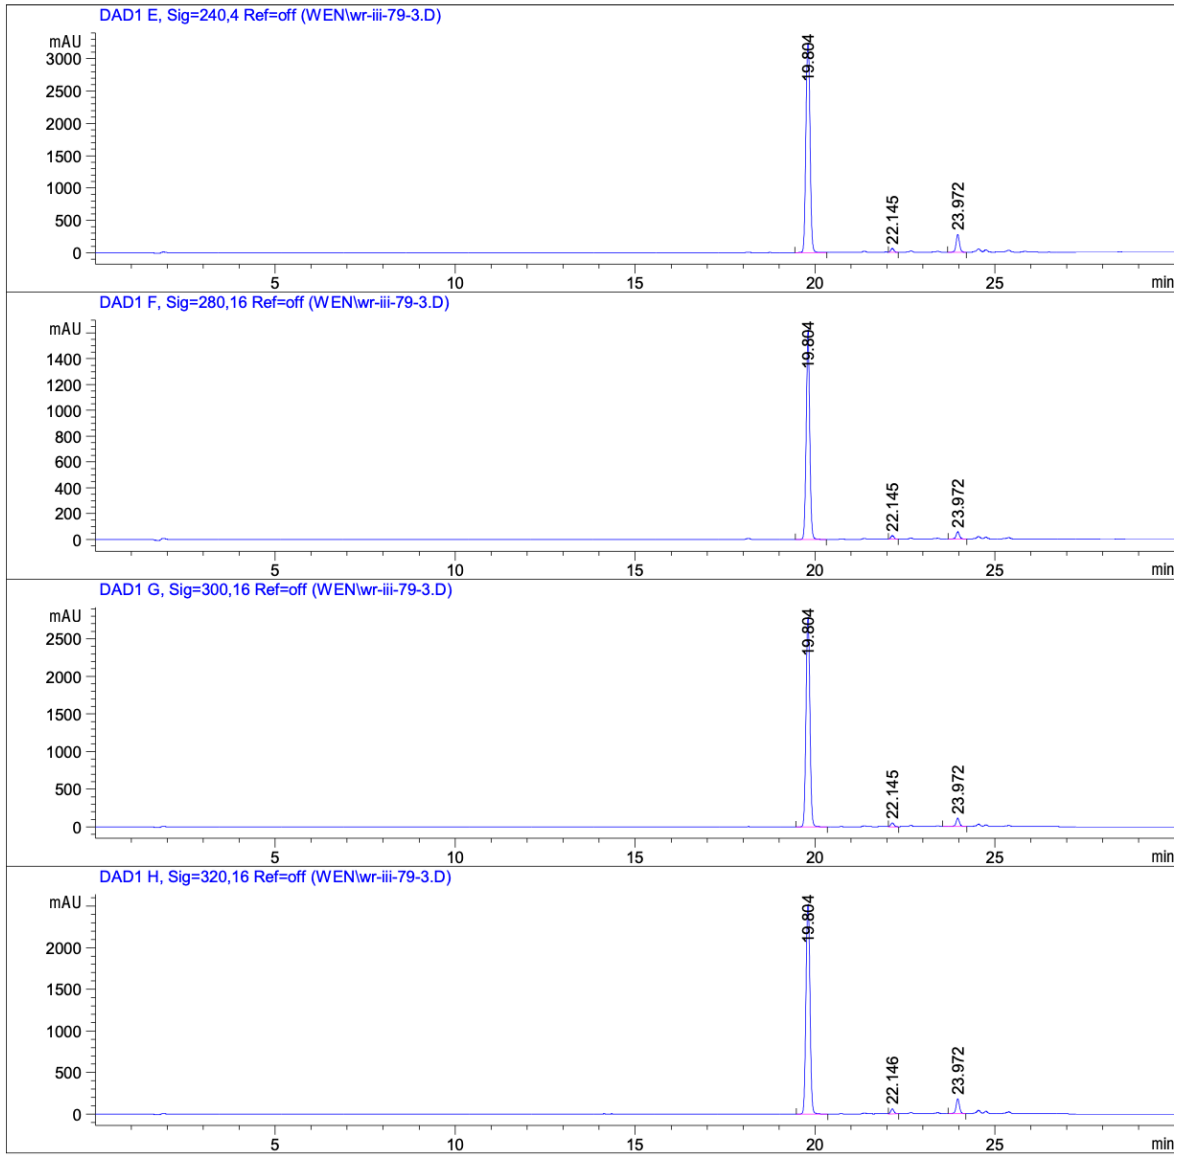

=====  
Area Percent Report  
=====

Sorted By : Signal  
Multiplier : 1.0000  
Dilution : 1.0000  
Sample Amount: : 1.00000 [ng/ul] (not used in calc.)  
Use Multiplier & Dilution Factor with ISTDs

Data File C:\Chem32\1\Data\WEN\wr-iii-79-3.D  
Sample Name: wr-iii-79-3

Signal 1: DAD1 A, Sig=254,4 Ref=off

| Peak # | RetTime [min] | Type | Width [min] | Area [mAU*s] | Height [mAU] | Area %  |
|--------|---------------|------|-------------|--------------|--------------|---------|
| 1      | 19.804        | BB   | 0.1070      | 1.19571e4    | 1721.52454   | 91.4717 |
| 2      | 22.145        | VB   | 0.0945      | 256.08728    | 42.38355     | 1.9591  |
| 3      | 23.972        | BB   | 0.0984      | 604.16827    | 94.75039     | 4.6219  |
| 4      | 24.549        | BV   | 0.1110      | 254.55943    | 34.14898     | 1.9474  |

Totals : 1.30719e4 1892.80745

Signal 2: DAD1 B, Sig=254,16 Ref=off

| Peak # | RetTime [min] | Type | Width [min] | Area [mAU*s] | Height [mAU] | Area %  |
|--------|---------------|------|-------------|--------------|--------------|---------|
| 1      | 19.804        | BB   | 0.1081      | 1.31459e4    | 1867.05139   | 94.9395 |
| 2      | 23.972        | VB   | 0.0989      | 700.70874    | 109.17844    | 5.0605  |

Totals : 1.38466e4 1976.22983

Signal 3: DAD1 C, Sig=210,8 Ref=off

| Peak # | RetTime [min] | Type | Width [min] | Area [mAU*s] | Height [mAU] | Area %  |
|--------|---------------|------|-------------|--------------|--------------|---------|
| 1      | 19.807        | VV   | 0.1839      | 3.70037e4    | 3272.19019   | 85.3839 |
| 2      | 22.145        | VB   | 0.0941      | 521.38971    | 86.75980     | 1.2031  |
| 3      | 23.972        | BB   | 0.0973      | 4413.84863   | 702.31647    | 10.1847 |
| 4      | 24.548        | VV   | 0.1136      | 727.65814    | 94.72643     | 1.6790  |
| 5      | 25.385        | VB   | 0.1249      | 671.43762    | 80.85714     | 1.5493  |

Totals : 4.33380e4 4236.85002

Signal 4: DAD1 D, Sig=230,16 Ref=off

| Peak # | RetTime [min] | Type | Width [min] | Area [mAU*s] | Height [mAU] | Area %  |
|--------|---------------|------|-------------|--------------|--------------|---------|
| 1      | 19.804        | VV   | 0.1505      | 3.11274e4    | 3345.63794   | 93.2722 |
| 2      | 23.972        | BV   | 0.0978      | 2245.23389   | 354.75153    | 6.7278  |

Totals : 3.33727e4 3700.38947

Data File C:\Chem32\1\Data\WEN\wr-iii-79-3.D  
Sample Name: wr-iii-79-3

Signal 5: DAD1 E, Sig=240,4 Ref=off

| Peak # | RetTime [min] | Type | Width [min] | Area [mAU*s] | Height [mAU] | Area %  |
|--------|---------------|------|-------------|--------------|--------------|---------|
| 1      | 19.804        | BV   | 0.1316      | 2.65419e4    | 3240.31958   | 92.6386 |
| 2      | 22.145        | VB   | 0.0944      | 370.58215    | 61.39384     | 1.2934  |
| 3      | 23.972        | BB   | 0.0977      | 1738.52783   | 275.15390    | 6.0679  |

Totals : 2.86510e4 3576.86732

Signal 6: DAD1 F, Sig=280,16 Ref=off

| Peak # | RetTime [min] | Type | Width [min] | Area [mAU*s] | Height [mAU] | Area %  |
|--------|---------------|------|-------------|--------------|--------------|---------|
| 1      | 19.804        | BB   | 0.1070      | 1.12664e4    | 1623.22388   | 95.5305 |
| 2      | 22.145        | VB   | 0.0945      | 167.03540    | 27.64040     | 1.4163  |
| 3      | 23.972        | BB   | 0.0998      | 360.07422    | 55.39006     | 3.0531  |

Totals : 1.17935e4 1706.25433

Signal 7: DAD1 G, Sig=300,16 Ref=off

| Peak # | RetTime [min] | Type | Width [min] | Area [mAU*s] | Height [mAU] | Area %  |
|--------|---------------|------|-------------|--------------|--------------|---------|
| 1      | 19.804        | BV   | 0.1219      | 2.14595e4    | 2785.30298   | 95.3193 |
| 2      | 22.145        | VB   | 0.0948      | 312.22397    | 51.46977     | 1.3868  |
| 3      | 23.972        | VB   | 0.1019      | 741.56122    | 111.10456    | 3.2939  |

Totals : 2.25133e4 2947.87731

Signal 8: DAD1 H, Sig=320,16 Ref=off

| Peak # | RetTime [min] | Type | Width [min] | Area [mAU*s] | Height [mAU] | Area %  |
|--------|---------------|------|-------------|--------------|--------------|---------|
| 1      | 19.804        | BV   | 0.1271      | 2.01174e4    | 2520.65381   | 92.9423 |
| 2      | 22.146        | VB   | 0.0947      | 366.05951    | 60.38461     | 1.6912  |
| 3      | 23.972        | VB   | 0.0990      | 1161.58008   | 180.74988    | 5.3665  |

Totals : 2.16451e4 2761.78830

=====  
\*\*\* End of Report \*\*\*

# Compound 5m

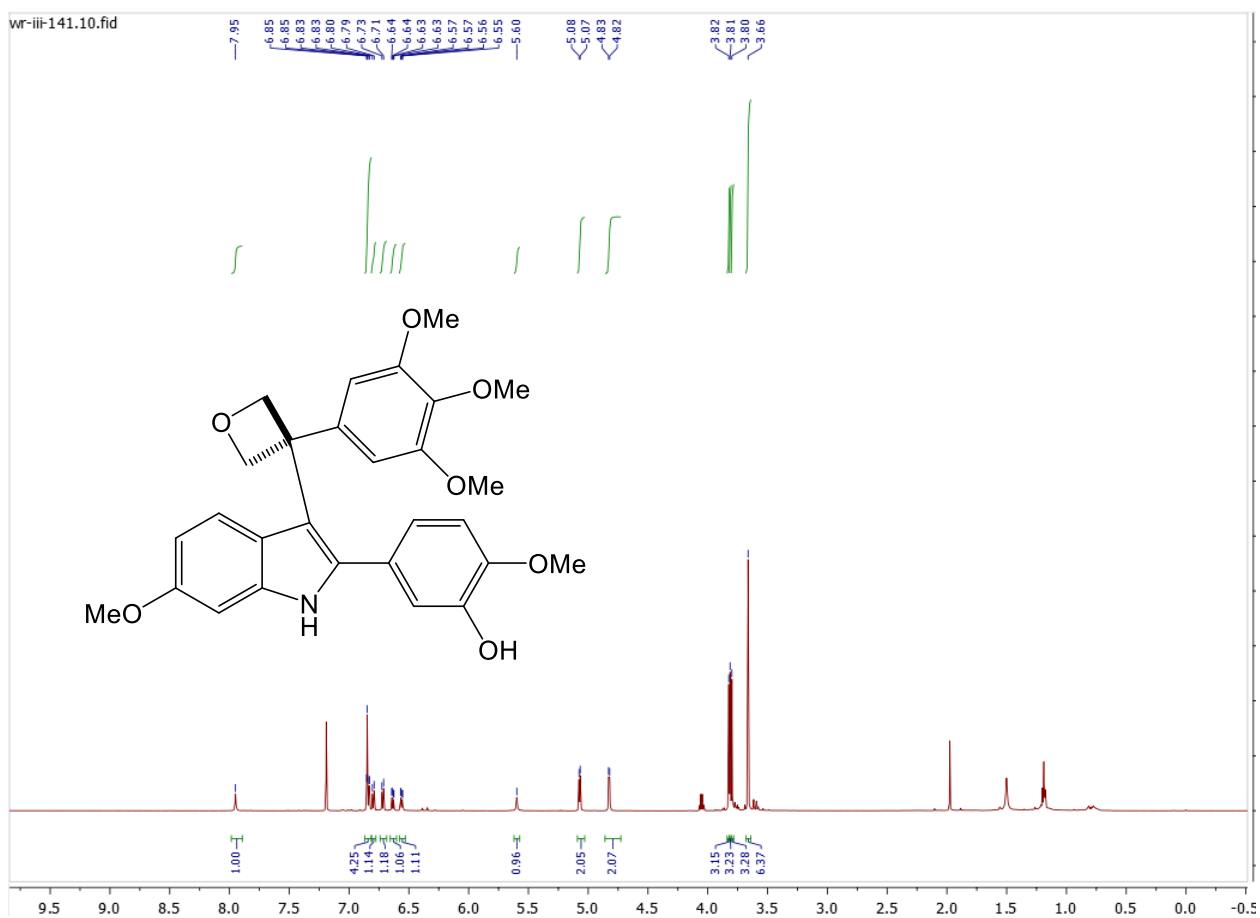

wr-iii-141-2.11.fid

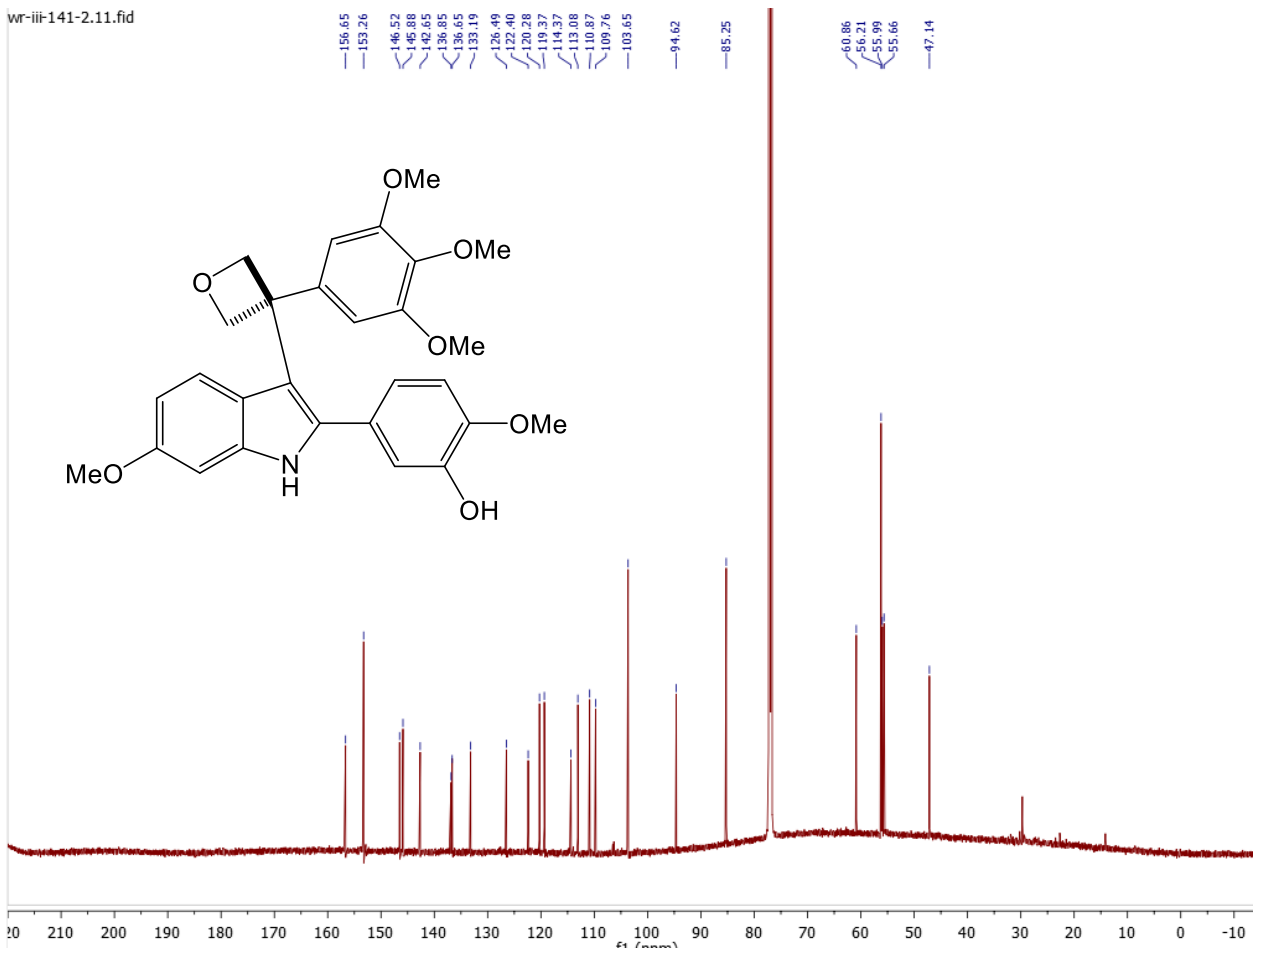

#1800 AV: 3 IT: 400.000 ST: 1.04 uS: 1 NL: 1.12E6  
F: FTMS + p ESI Full ms [50.00-750.00]  
Info: Ufill=0.01 RF=600V

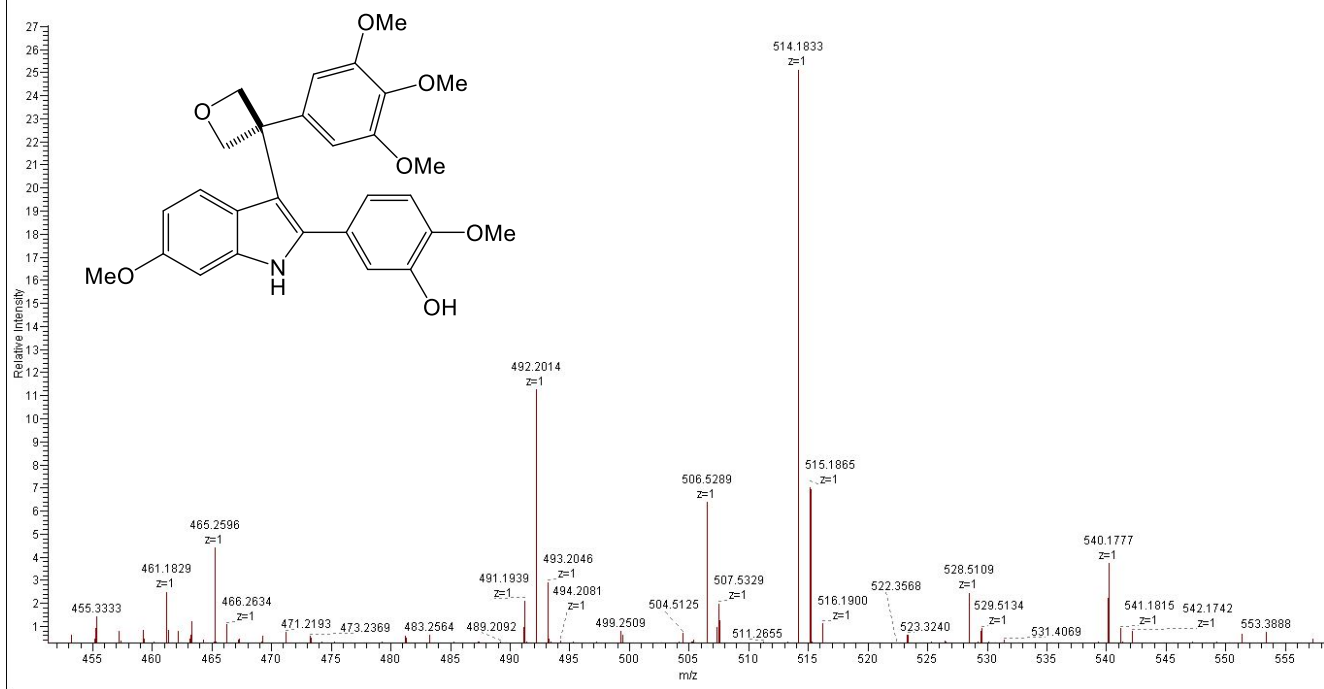

Data File C:\Chem32\1\Data\Ricardo\WR-III-137.D  
Sample Name: WR-III-137

=====

Acq. Operator : SYSTEM  
Sample Operator : SYSTEM  
Acq. Instrument : 1200 HPLC                      Location : 1  
Injection Date : 3/29/2021 2:11:46 PM                      Inj Volume : No inj

Acq. Method : C:\Chem32\1\Methods\GRAD 2 30-90 ACN.M  
Last changed : 4/2/2014 4:04:33 PM by ERICA P  
Analysis Method : C:\Chem32\1\Methods\RT-ACNWASH 2.M  
Last changed : 7/9/2015 2:27:22 PM by Blake  
Method Info : General Column Wash Method

Sample Info : WR-III-137 OXi8006 oxetane 30-90 ACN

Additional Info : Peak(s) manually integrated

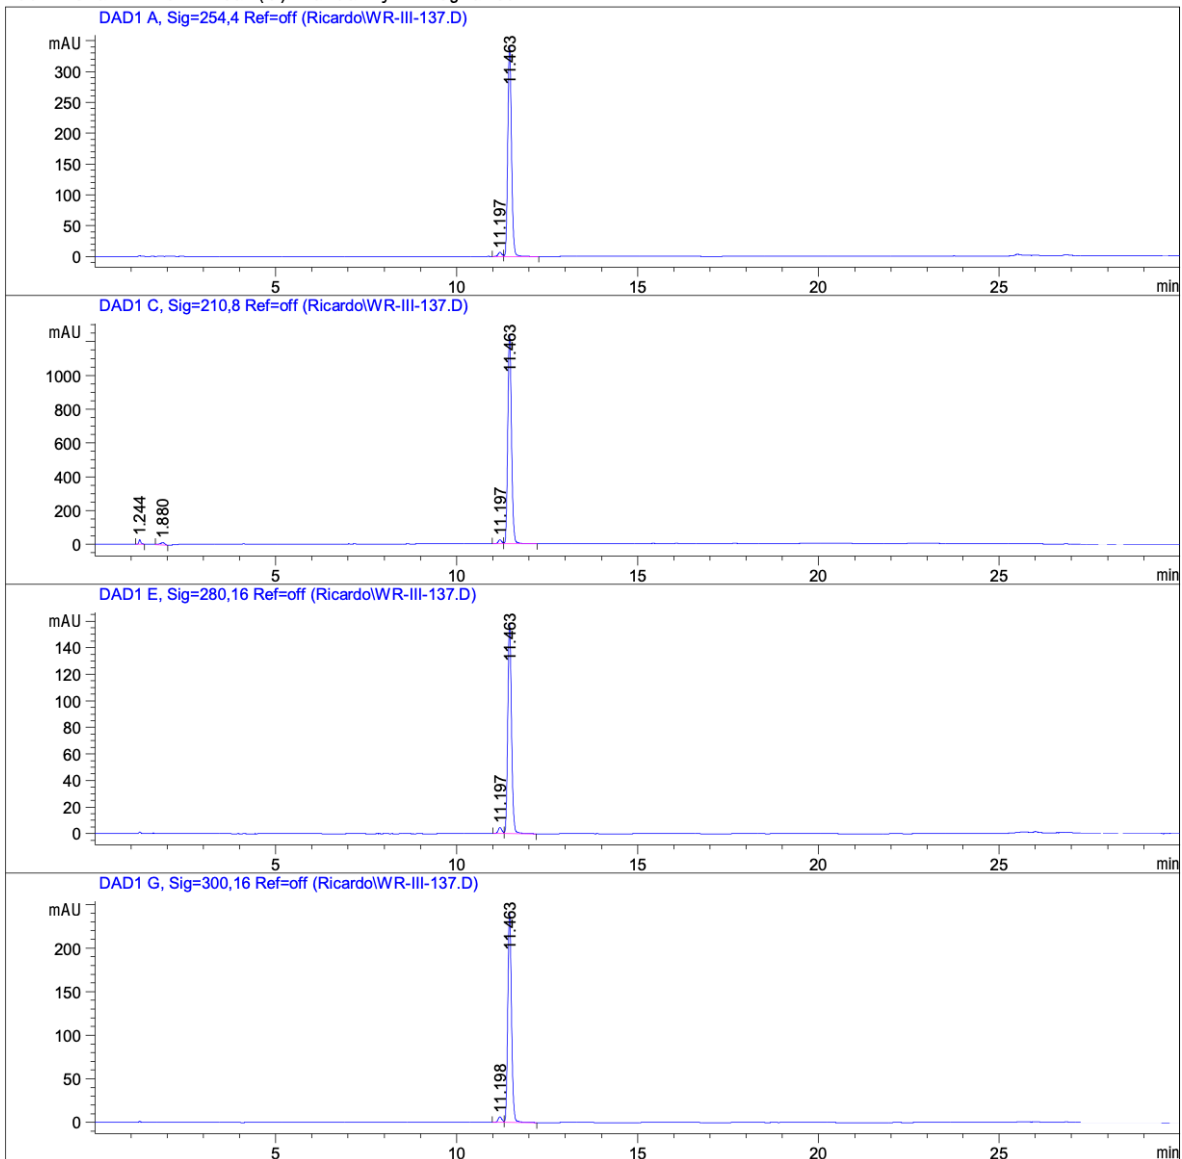



Data File C:\Chem32\1\Data\Ricardo\WR-III-137.D  
 Sample Name: WR-III-137

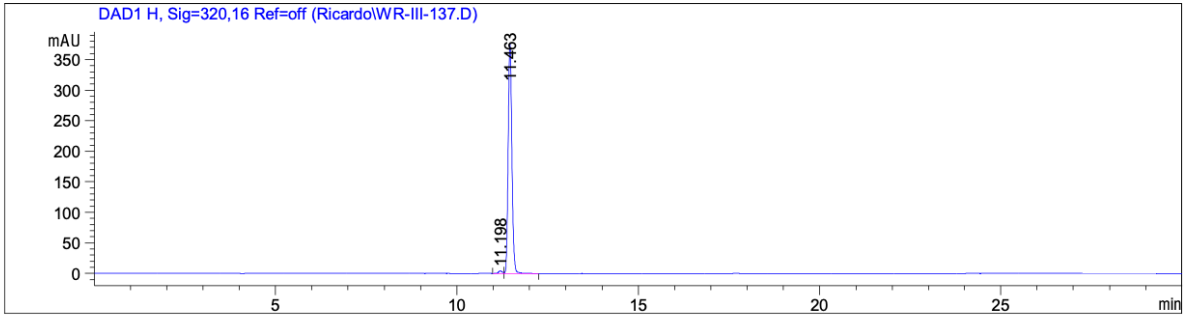

=====  
 Area Percent Report  
 =====

Sorted By : Signal  
 Multiplier : 1.0000  
 Dilution : 1.0000  
 Sample Amount : 1.00000 [ng/ul] (not used in calc.)  
 Use Multiplier & Dilution Factor with ISTDs

Signal 1: DAD1 A, Sig=254,4 Ref=off

| Peak # | RetTime [min] | Type | Width [min] | Area [mAU*s] | Height [mAU] | Area %  |
|--------|---------------|------|-------------|--------------|--------------|---------|
| 1      | 11.197        | BV   | 0.1088      | 49.06672     | 6.90990      | 2.0152  |
| 2      | 11.463        | VB   | 0.1073      | 2385.76221   | 342.48453    | 97.9848 |

Totals : 2434.82893 349.39443

Signal 2: DAD1 C, Sig=210,8 Ref=off

| Peak # | RetTime [min] | Type | Width [min] | Area [mAU*s] | Height [mAU] | Area %  |
|--------|---------------|------|-------------|--------------|--------------|---------|
| 1      | 1.244         | BV   | 0.0587      | 104.28168    | 27.23908     | 1.1478  |
| 2      | 1.880         | VB   | 0.1357      | 137.16713    | 14.85493     | 1.5097  |
| 3      | 11.197        | BV   | 0.1062      | 163.59390    | 23.78542     | 1.8006  |
| 4      | 11.463        | VB   | 0.1074      | 8680.57520   | 1243.79224   | 95.5419 |

Totals : 9085.61790 1309.67167

Signal 3: DAD1 E, Sig=280,16 Ref=off

| Peak # | RetTime [min] | Type | Width [min] | Area [mAU*s] | Height [mAU] | Area %  |
|--------|---------------|------|-------------|--------------|--------------|---------|
| 1      | 11.197        | BV   | 0.1088      | 32.96772     | 4.64467      | 2.8806  |
| 2      | 11.463        | VB   | 0.1076      | 1111.49072   | 158.95779    | 97.1194 |

Data File C:\Chem32\1\Data\Ricardo\WR-III-137.D  
Sample Name: WR-III-137

| Peak #                                    | RetTime [min] | Type | Width [min] | Area [mAU*s] | Height [mAU] | Area % |
|-------------------------------------------|---------------|------|-------------|--------------|--------------|--------|
| ----- ----- ----- ----- ----- ----- ----- |               |      |             |              |              |        |
| Totals :                                  |               |      |             | 1144.45844   | 163.60246    |        |

Signal 4: DAD1 G, Sig=300,16 Ref=off

| Peak #                                    | RetTime [min] | Type | Width [min] | Area [mAU*s] | Height [mAU] | Area %  |
|-------------------------------------------|---------------|------|-------------|--------------|--------------|---------|
| ----- ----- ----- ----- ----- ----- ----- |               |      |             |              |              |         |
| 1                                         | 11.198        | BV   | 0.1081      | 46.57622     | 6.61492      | 2.6848  |
| 2                                         | 11.463        | VB   | 0.1073      | 1688.24109   | 242.20956    | 97.3152 |
| ----- ----- ----- ----- ----- ----- ----- |               |      |             |              |              |         |
| Totals :                                  |               |      |             | 1734.81731   | 248.82448    |         |

Signal 5: DAD1 H, Sig=320,16 Ref=off

| Peak #                                    | RetTime [min] | Type | Width [min] | Area [mAU*s] | Height [mAU] | Area %  |
|-------------------------------------------|---------------|------|-------------|--------------|--------------|---------|
| ----- ----- ----- ----- ----- ----- ----- |               |      |             |              |              |         |
| 1                                         | 11.198        | BV   | 0.1103      | 30.92123     | 4.27715      | 1.1633  |
| 2                                         | 11.463        | VB   | 0.1072      | 2627.15112   | 377.55621    | 98.8367 |
| ----- ----- ----- ----- ----- ----- ----- |               |      |             |              |              |         |
| Totals :                                  |               |      |             | 2658.07236   | 381.83337    |         |

=====  
\*\*\* End of Report \*\*\*

# Compound 5n

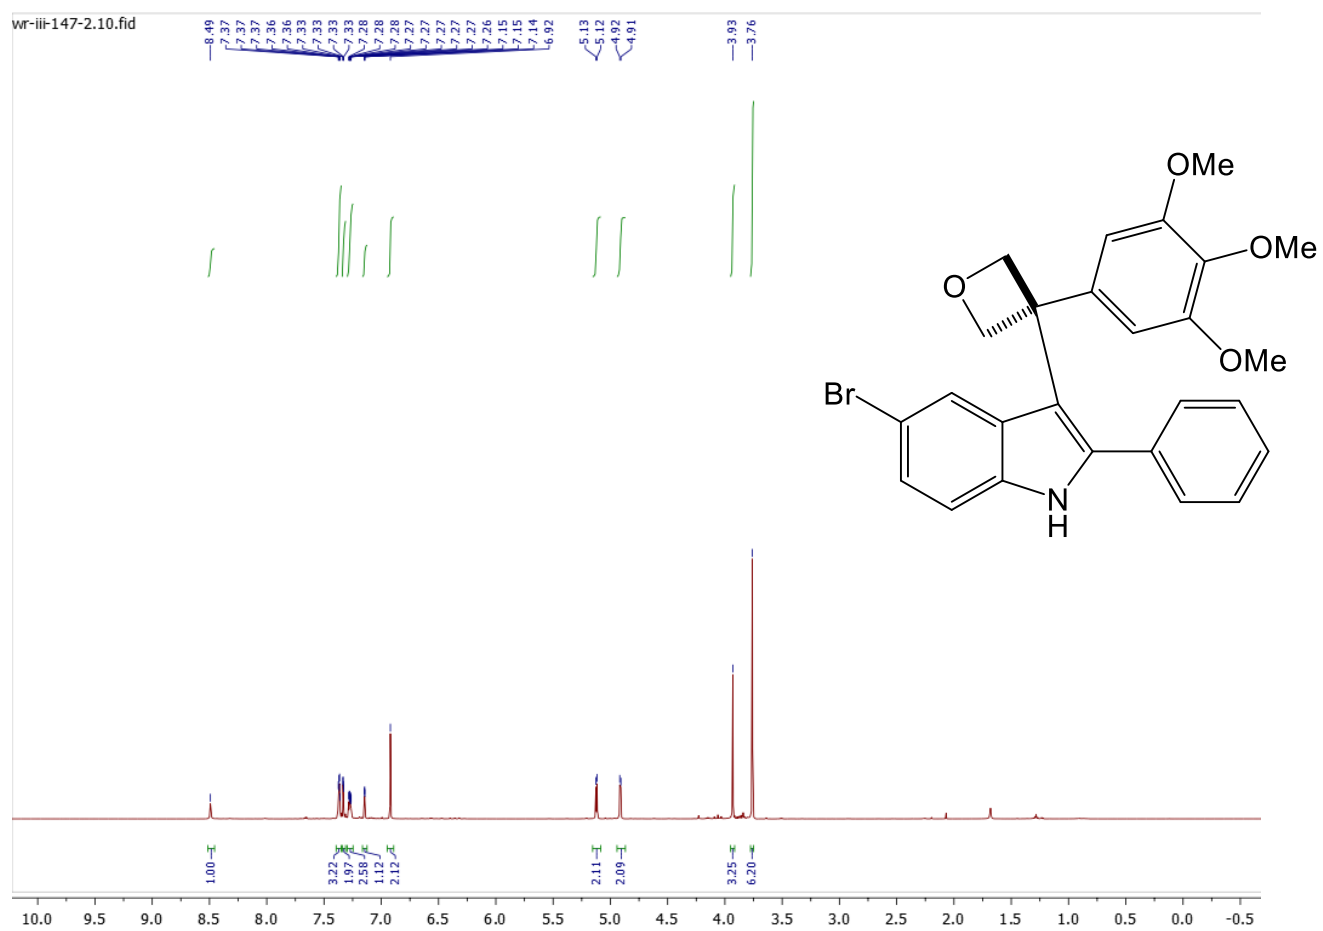

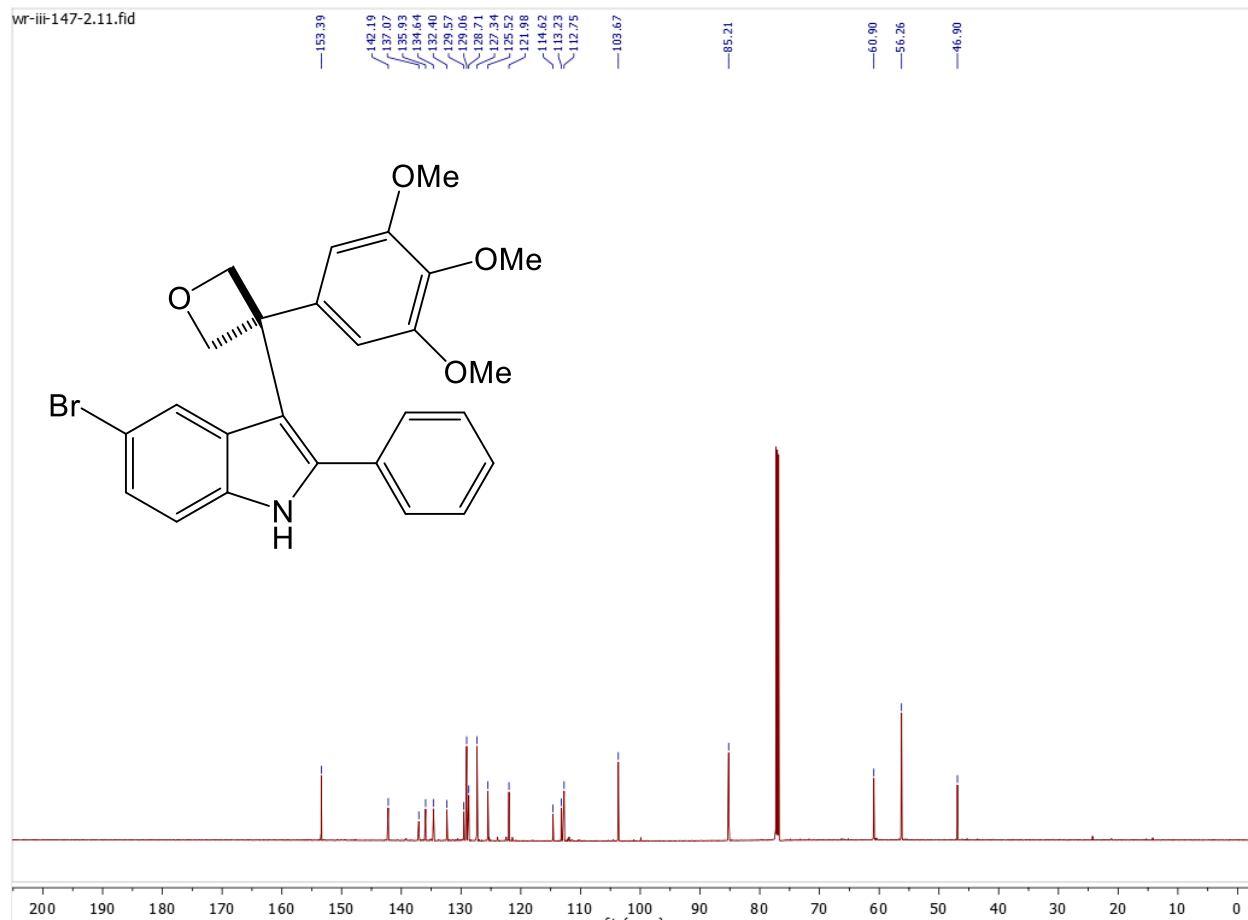

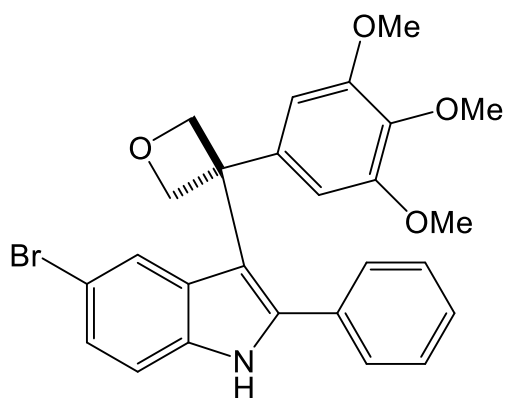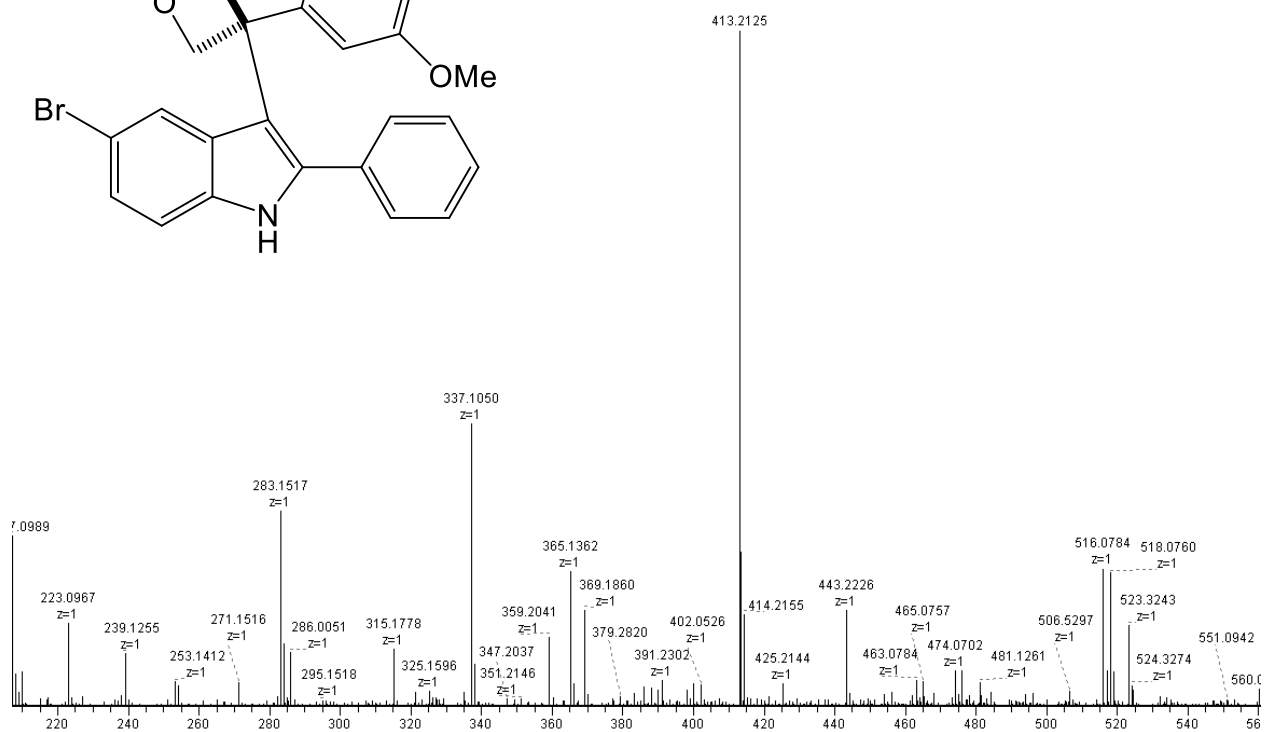

Data File C:\Chem32\1\Data\Ricardo\wr-iii-147-2.D  
Sample Name: wr-iii-147-2

=====

|                 |                                          |            |          |
|-----------------|------------------------------------------|------------|----------|
| Acq. Operator   | : SYSTEM                                 |            |          |
| Sample Operator | : SYSTEM                                 |            |          |
| Acq. Instrument | : 1200 HPLC                              | Location   | : 1      |
| Injection Date  | : 4/8/2021 1:38:05 PM                    | Inj Volume | : No inj |
| Acq. Method     | : C:\Chem32\1\Methods\GRAD 2 30-90 ACN.M |            |          |
| Last changed    | : 4/2/2014 4:04:33 PM by ERICA P         |            |          |
| Analysis Method | : C:\Chem32\1\Methods\RT-ACNWASH 2.M     |            |          |
| Last changed    | : 7/9/2015 2:27:22 PM by Blake           |            |          |
| Method Info     | : General Column Wash Method             |            |          |

Sample Info : wr-iii-147-2 ACN 30:90

Additional Info : Peak(s) manually integrated

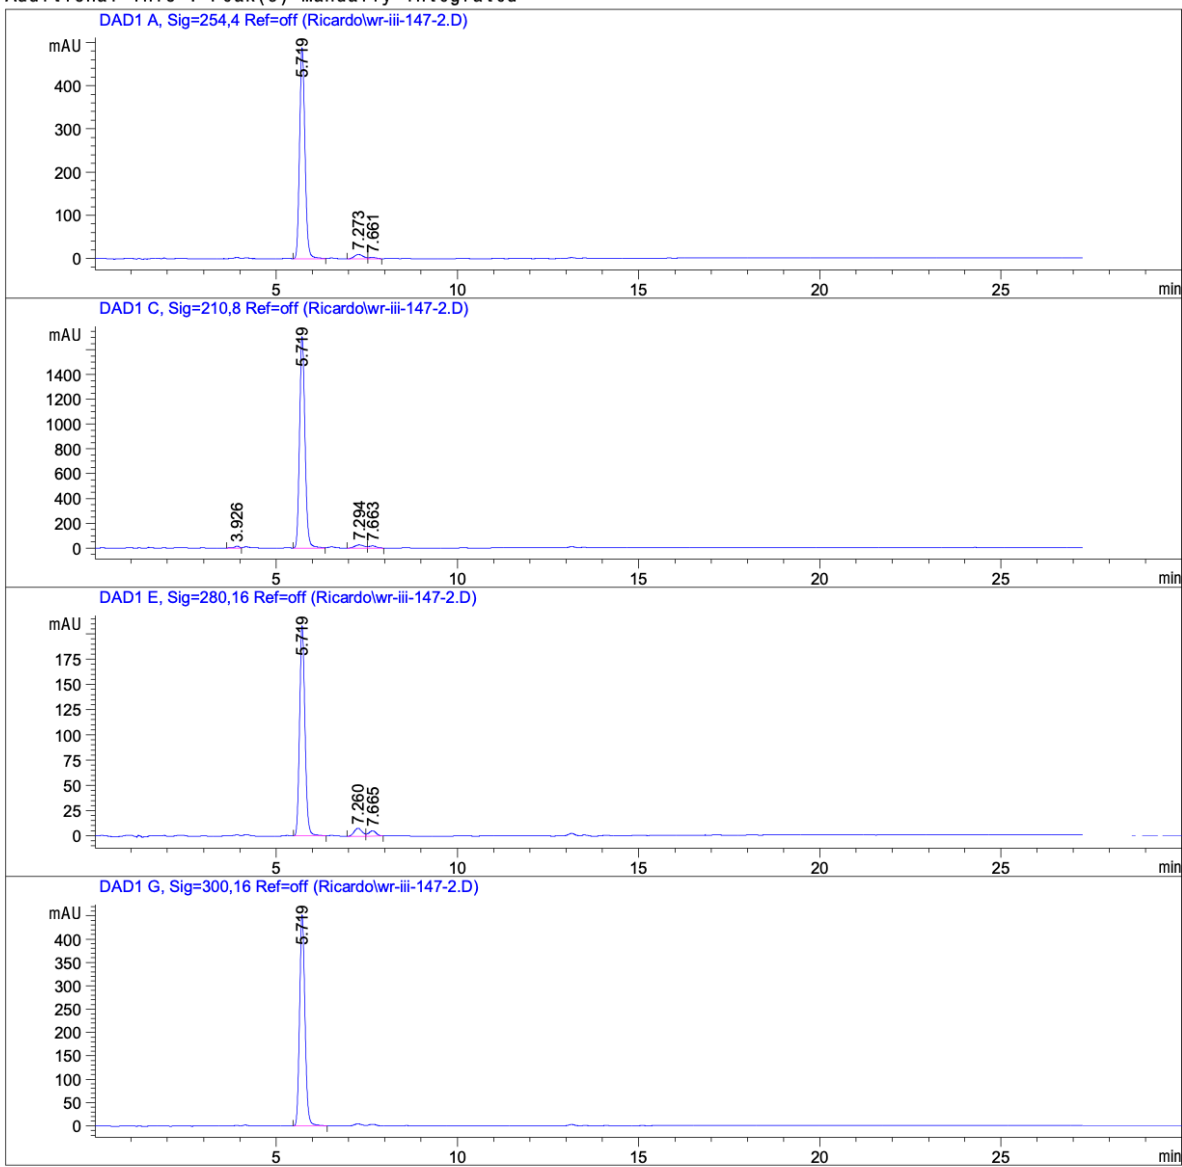

Data File C:\Chem32\1\Data\Ricardo\wr-iii-147-2.D  
 Sample Name: wr-iii-147-2

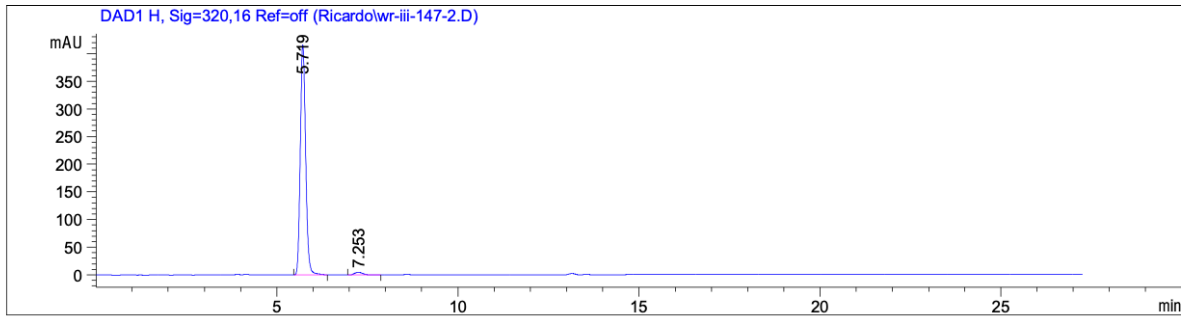

=====  
 Area Percent Report  
 =====

Sorted By : Signal  
 Multiplier : 1.0000  
 Dilution : 1.0000  
 Sample Amount : 1.00000 [ng/ul] (not used in calc.)  
 Use Multiplier & Dilution Factor with ISTDs

Signal 1: DAD1 A, Sig=254,4 Ref=off

| Peak # | RetTime [min] | Type | Width [min] | Area [mAU*s] | Height [mAU] | Area %  |
|--------|---------------|------|-------------|--------------|--------------|---------|
| 1      | 5.719         | VV   | 0.1646      | 5127.97217   | 488.12402    | 96.0488 |
| 2      | 7.273         | BV   | 0.2630      | 171.96848    | 10.29084     | 3.2210  |
| 3      | 7.661         | VB   | 0.1974      | 38.98065     | 3.00408      | 0.7301  |

Totals : 5338.92130 501.41894

Signal 2: DAD1 C, Sig=210,8 Ref=off

| Peak # | RetTime [min] | Type | Width [min] | Area [mAU*s] | Height [mAU] | Area %  |
|--------|---------------|------|-------------|--------------|--------------|---------|
| 1      | 3.926         | BV   | 0.1294      | 129.58307    | 15.20400     | 0.6893  |
| 2      | 5.719         | VV   | 0.1650      | 1.79987e4    | 1706.83838   | 95.7435 |
| 3      | 7.294         | BV   | 0.2723      | 435.54669    | 25.37051     | 2.3169  |
| 4      | 7.663         | VB   | 0.2104      | 235.03928    | 17.09587     | 1.2503  |

Totals : 1.87988e4 1764.50875

Signal 3: DAD1 E, Sig=280,16 Ref=off

Data File C:\Chem32\1\Data\Ricardo\wr-iii-147-2.D  
Sample Name: wr-iii-147-2

| Peak # | RetTime [min] | Type | Width [min] | Area [mAU*s] | Height [mAU] | Area %  |
|--------|---------------|------|-------------|--------------|--------------|---------|
| 1      | 5.719         | BB   | 0.1636      | 2171.55933   | 208.29308    | 91.8229 |
| 2      | 7.260         | BV   | 0.2386      | 120.45528    | 7.87022      | 5.0934  |
| 3      | 7.665         | VB   | 0.2175      | 72.92902     | 5.20343      | 3.0838  |

Totals :                    2364.94363   221.36673

Signal 4: DAD1 G, Sig=300,16 Ref=off

| Peak # | RetTime [min] | Type | Width [min] | Area [mAU*s] | Height [mAU] | Area %   |
|--------|---------------|------|-------------|--------------|--------------|----------|
| 1      | 5.719         | BB   | 0.1637      | 4710.84229   | 451.76431    | 100.0000 |

Totals :                    4710.84229   451.76431

Signal 5: DAD1 H, Sig=320,16 Ref=off

| Peak # | RetTime [min] | Type | Width [min] | Area [mAU*s] | Height [mAU] | Area %  |
|--------|---------------|------|-------------|--------------|--------------|---------|
| 1      | 5.719         | BB   | 0.1637      | 4334.10303   | 415.48242    | 98.1501 |
| 2      | 7.253         | BB   | 0.2462      | 81.68601     | 5.11836      | 1.8499  |

Totals :                    4415.78904   420.60078

=====  
\*\*\* End of Report \*\*\*



**Table of Compound Purity by HPLC (wavelength 254 nm)**

| Compound | HPLC Purity |
|----------|-------------|
| 5a       | 96.4%       |
| 5b       | 96.3%       |
| 5c       | 95.4%       |
| 5d       | 97.7%       |
| 5e       | 95.3%       |
| 5f       | 97.2%       |
| 5g       | 95.7%       |
| 5h       | 95.8%       |
| 5i       | 99.8%       |
| 5j       | 96.4%       |
| 5k       | 86.8%       |
| 5l       | 91.5%       |
| 5m       | 97.9%       |
| 5n       | 96.1%       |
